# Supplementary material for: Altered Expression and Localization of Tumor Suppressive E3 Ubiquitin Ligase SMURF2 in Human Prostate and Breast Cancer
Source: PubMed Central journal article supplement (PMC6521037; doi:10.3390/cancers11040556), 2019-04-18
Supplement: cancers-11-00556-s001.pdf [file cancers-11-00556-s001.pdf]

# Supplementary Materials For:

## Altered expression and localization of tumor suppressive E3 ubiquitin ligase SMURF2 in human prostate and breast cancer

Andrea Emanuelli, Dhanoop Manikoth Ayyathan, Praveen Koganti, Pooja Anil Shah, Liat Apel-Sarid, Biagio Paolini, Rajesh Detroja, Milana Frenkel-Morgenstern and Michael Blank

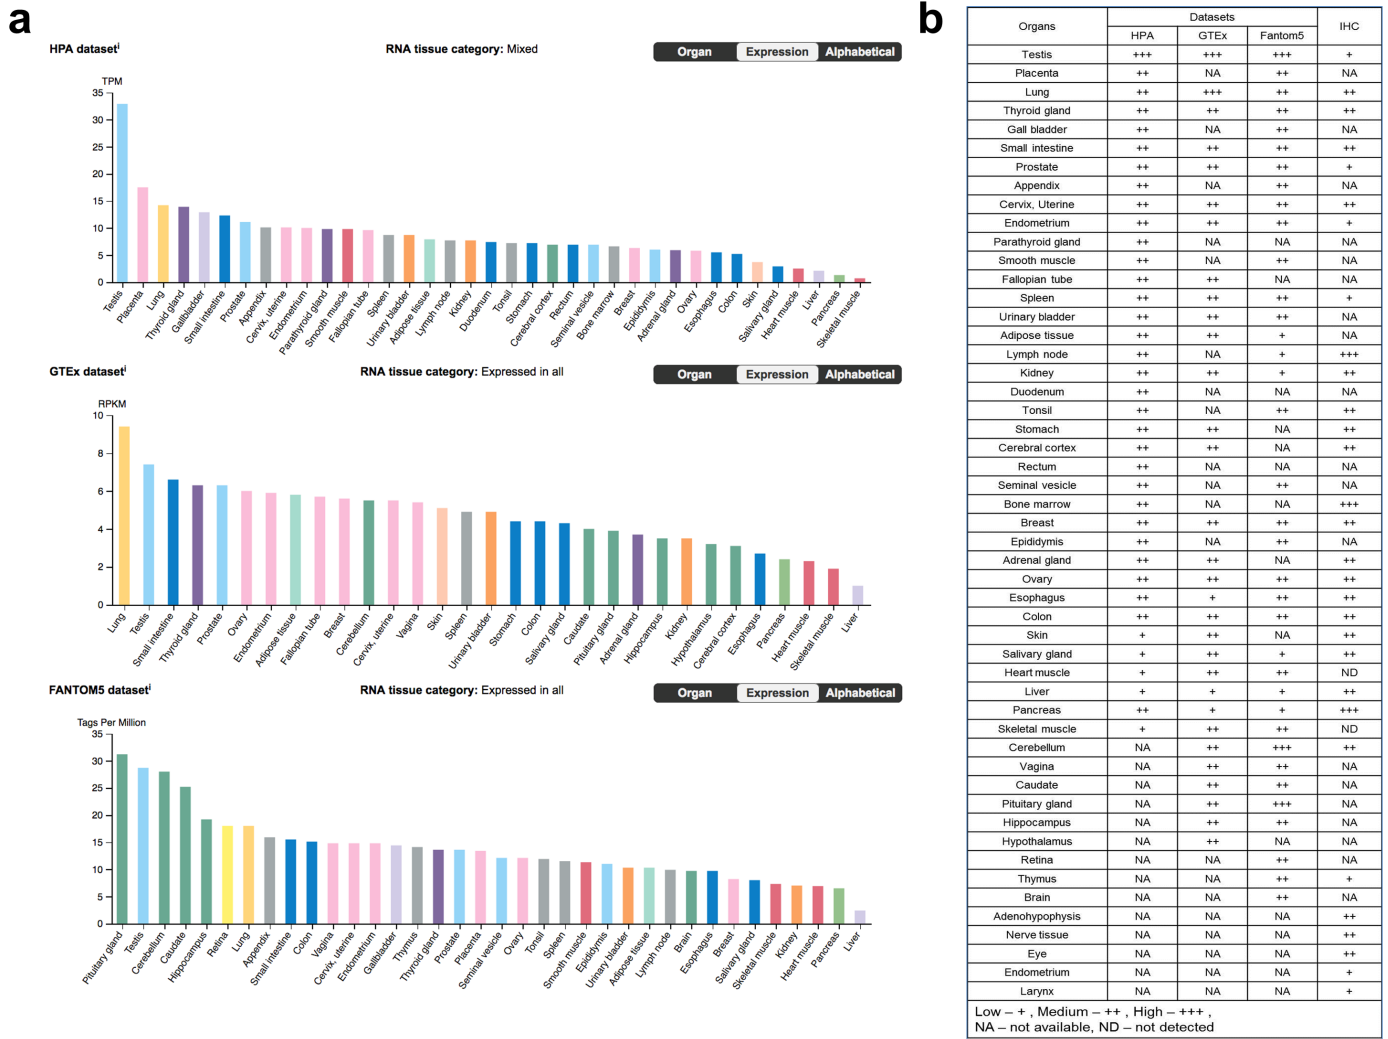

**Figure S1.** *SMURF2* gene and protein expressions in human organs and tissues. (a) The mRNA expression levels of *SMURF2* in a panel of human normal organs and tissues: HPA, GTEx and FANTOM datasets. (b) Comparative analysis of IHC-based *SMURF2* protein expression versus its gene expression.

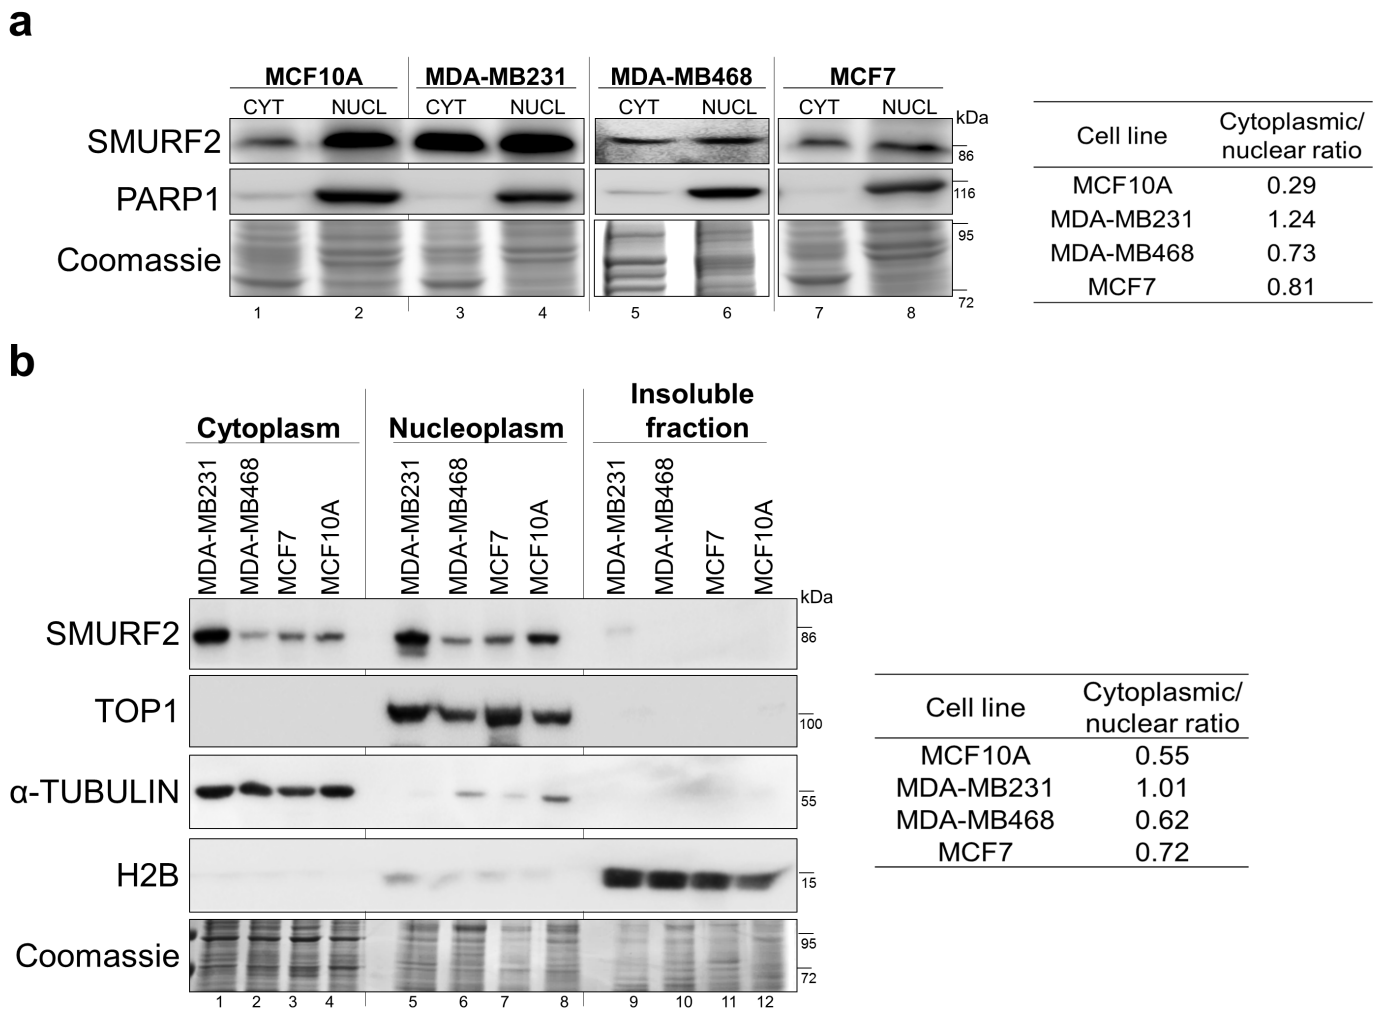

**Figure S2.** The expression and molecular localization of SMURF2 in human breast cell models. (a) Western blot analysis of SMURF2 expression in protein fractions prepared from non-tumorigenic mammary epithelial MCF10A cells and metastatic breast carcinoma cell models. Right panel shows the cytoplasm/nucleoplasm ratio of SMURF2 in the cytoplasmic (CYT) and nucleoplasmic (NUCL) compartments of the cells, normalized to coomassie staining. (b) SMURF2 expression analysis conducted as in (a), but incorporating three cellular fractions: cytoplasm, nucleoplasm and insoluble, chromatin-containing, fraction solubilized with sonication. All samples were run on the same SDS-PAGE and probed with the indicated antibodies. Coomassie gel staining was also conducted, and used for sample normalization. The quality of fractionation is demonstrated by sample probing with anti-TOP1 (nuclear marker), anti- $\alpha$ -TUBULIN (cytoplasmic marker), and anti-histone-H2B (chromatin marker) antibodies. Right panel shows the cytoplasm/nucleoplasm ratio of SMURF2 expression in untransformed and breast cancer cells normalized to coomassie.

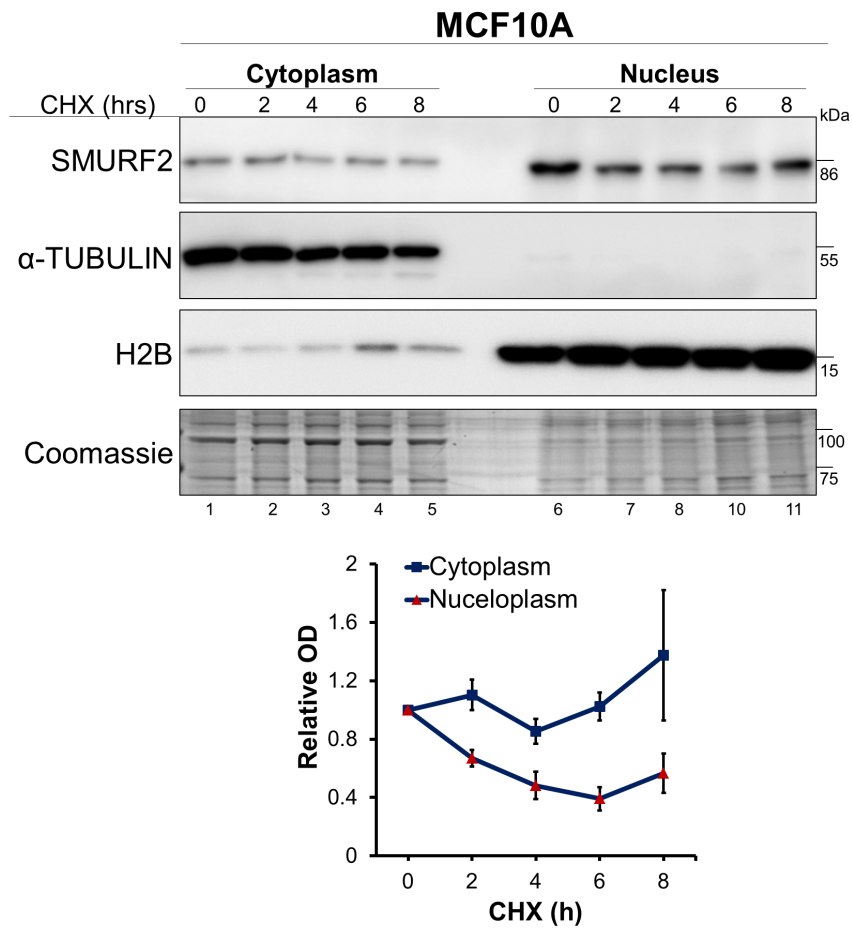

**Figure S3.** Examination of SMURF2 turnover rate in the cytoplasmic and nuclear fraction of MCF10A cells. Cells were treated with CHX and fractionated as described in Figure 5. The bottom panel shows the quantification of the data relative to the appropriate loading controls ( $\alpha$ -TUBULIN for cytoplasmic fraction and H2B for nuclear fraction) derived from two independent experiments. The data are presented as Mean $\pm$ SEM. The sample loading was also visualized with coomassie gel staining.

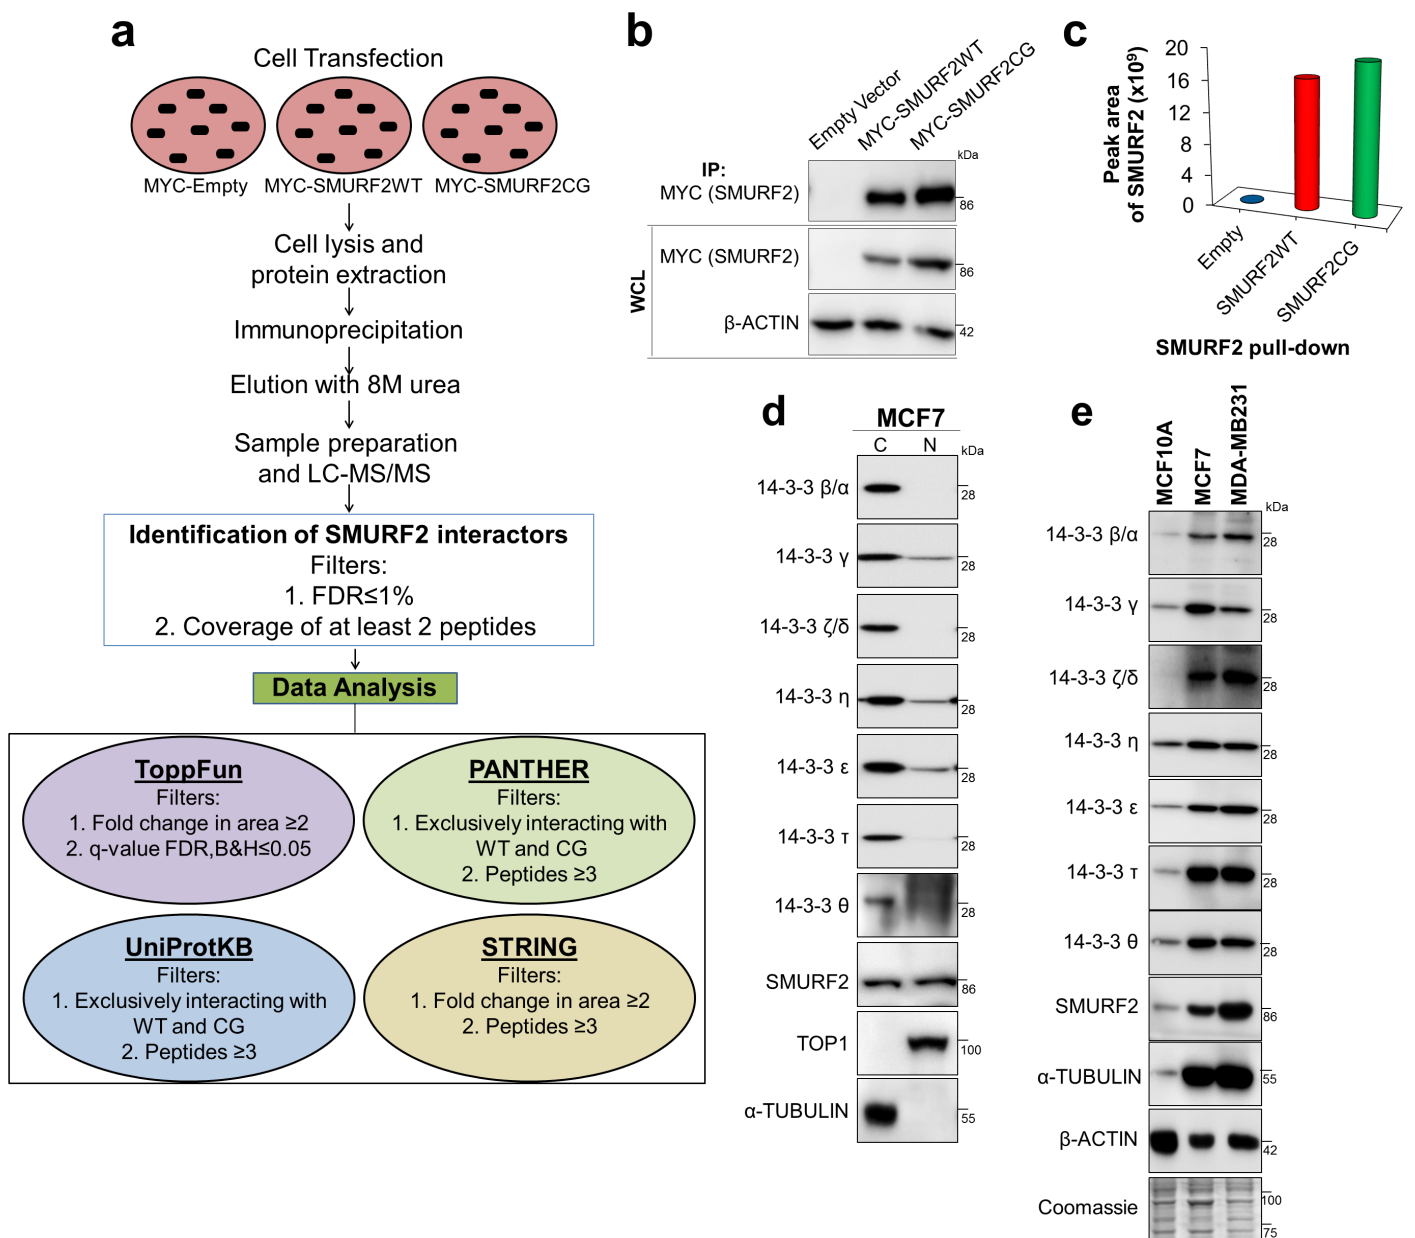

**Figure S4.** Experimental workflow and validation of SMURF2 affinity purification in immunoblots and MS analysis, and investigation of 14-3-3s in SMURF2 complexes and expression in breast cell models. (a) Schematic diagram of experimental design used for identification and characterization of the SMURF2 interactome. (b) Western blot analysis showing the efficiency of SMURF2 pull-down from HEK293T cells. (c) LC-MS/MS analysis showing the efficiency of SMURF2 pull-down from SMURF2WT and SMURF2CG expressing cells. Empty vector was used as control. Data are presented as peak area of SMURF2. (d) Subcellular localization of 14-3-3 isoforms in MCF7 cells. The quality of fractionation is demonstrated by membrane probing with cytoplasmic marker  $\alpha$ -TUBULIN, and nuclear protein marker TOP1. (e) Comparative western blot analysis of the expression levels of 14-3-3s in untransformed and breast cancer cells. Equal amount of proteins (20  $\mu$ g per lane) were resolved in SDS-PAGE and analysed in immunoblots with the indicated antibodies. Because these different cell strains differ in the expression levels of housekeeping genes (e.g.  $\alpha$ -TUBULIN and  $\beta$ -ACTIN), these samples were also subjected to coomassie staining.

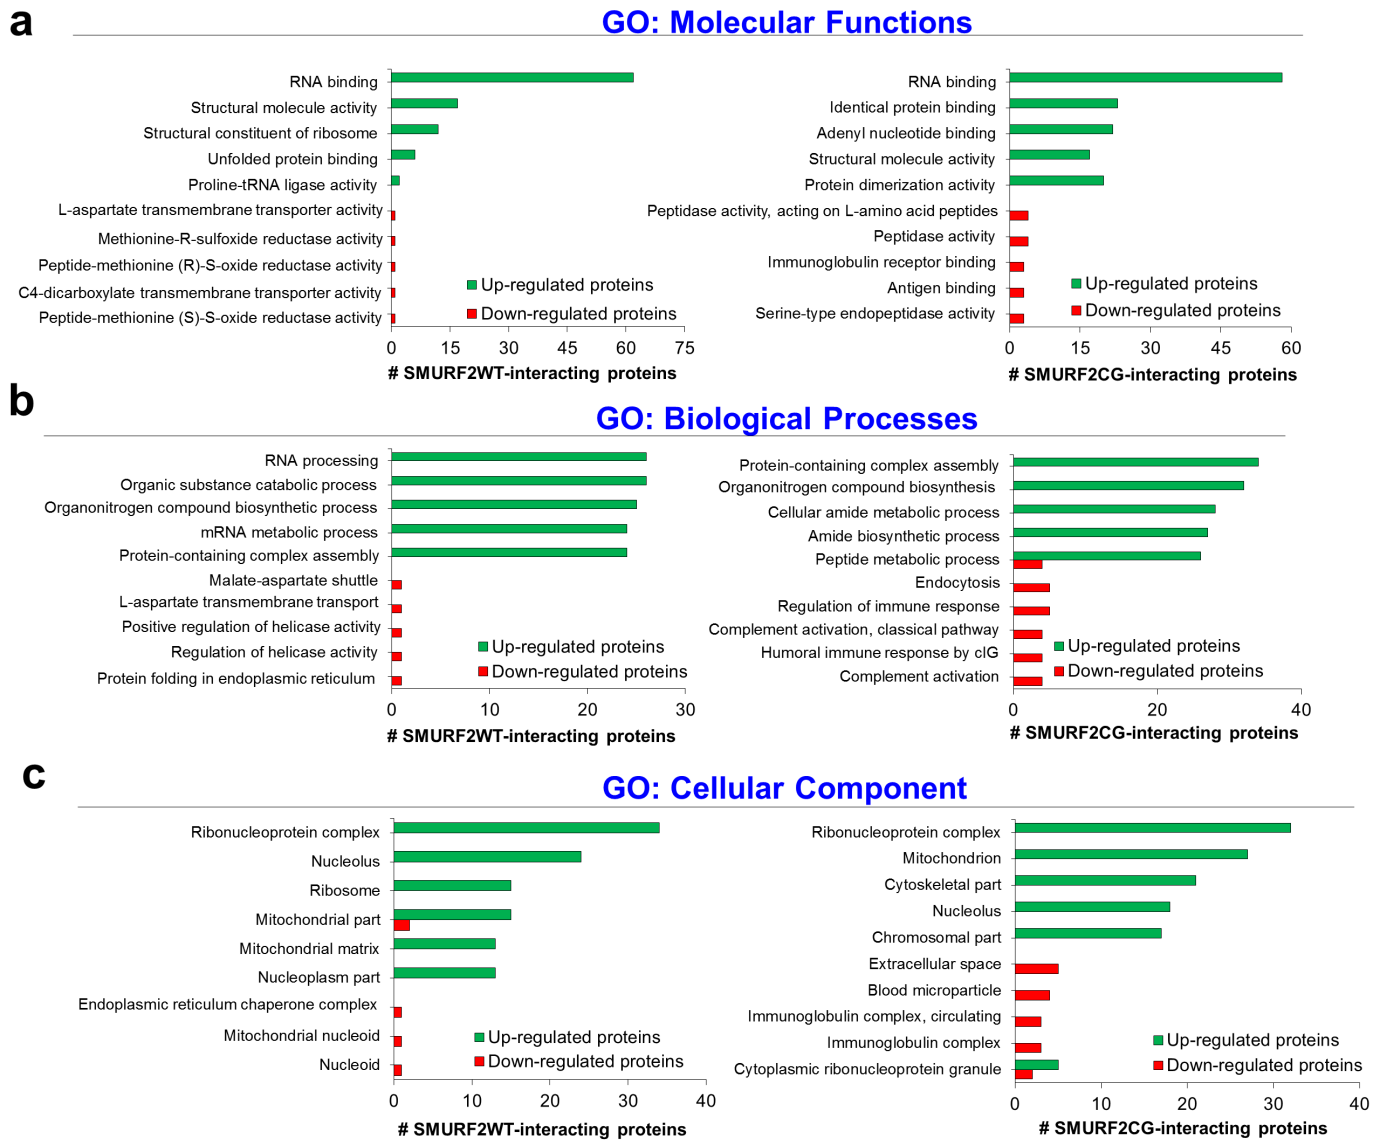

**Figure S5.** Gene Ontology analyses of the SMURF2 interactomes for SMURF2WT and E3 ligase-dead SMURF2CG. **(a-c)**, GO terms for molecular functions, biological processes and cellular components enriched in SMURF2WT and SMURF2CG samples. For statistical significance, only q-values FDR B&H  $\leq 0.05$  were considered. cIG- circulating immunoglobulin. Note, only top ten enriched functions are shown. The full list is presented in Table S2

**Table S1: Details of GO terms for SMURF2**

| <b>Increased in the presence of SMURF2 (wild-type and mutant Cys716Gly form)</b> |            |                                                                                    |                                |                                    |
|----------------------------------------------------------------------------------|------------|------------------------------------------------------------------------------------|--------------------------------|------------------------------------|
| <b>Category</b>                                                                  | <b>ID</b>  | <b>Name</b>                                                                        | <b>q-value FDR<br/>B&amp;H</b> | <b>Hit Count in<br/>Query List</b> |
| <b>Molecular Functions</b>                                                       |            |                                                                                    |                                |                                    |
| GO: Molecular Function                                                           | GO:0003723 | RNA binding                                                                        | 2.22E-217                      | 347                                |
| GO: Molecular Function                                                           | GO:0005198 | structural molecule activity                                                       | 4.784E-58                      | 131                                |
| GO: Molecular Function                                                           | GO:0019899 | enzyme binding                                                                     | 1.034E-07                      | 108                                |
| GO: Molecular Function                                                           | GO:0003735 | structural constituent of ribosome                                                 | 1.429E-100                     | 107                                |
| GO: Molecular Function                                                           | GO:0017076 | purine nucleotide binding                                                          | 0.000000341                    | 104                                |
| GO: Molecular Function                                                           | GO:0035639 | purine ribonucleoside triphosphate binding                                         | 7.577E-07                      | 100                                |
| GO: Molecular Function                                                           | GO:0032550 | purine ribonucleoside binding                                                      | 0.000001041                    | 100                                |
| GO: Molecular Function                                                           | GO:0032549 | ribonucleoside binding                                                             | 0.000001044                    | 100                                |
| GO: Molecular Function                                                           | GO:0001883 | purine nucleoside binding                                                          | 0.000001044                    | 100                                |
| GO: Molecular Function                                                           | GO:0001882 | nucleoside binding                                                                 | 0.000001217                    | 100                                |
| GO: Molecular Function                                                           | GO:0032555 | purine ribonucleotide binding                                                      | 0.000002354                    | 100                                |
| GO: Molecular Function                                                           | GO:0032553 | ribonucleotide binding                                                             | 0.000003451                    | 100                                |
| GO: Molecular Function                                                           | GO:0044877 | protein-containing complex binding                                                 | 1.294E-07                      | 95                                 |
| GO: Molecular Function                                                           | GO:0030554 | adenyl nucleotide binding                                                          | 0.0000198                      | 83                                 |
| GO: Molecular Function                                                           | GO:0042802 | identical protein binding                                                          | 3.981E-07                      | 82                                 |
| GO: Molecular Function                                                           | GO:0005524 | ATP binding                                                                        | 0.00002856                     | 80                                 |
| GO: Molecular Function                                                           | GO:0032559 | adenyl ribonucleotide binding                                                      | 0.00007844                     | 80                                 |
| GO: Molecular Function                                                           | GO:0016462 | pyrophosphatase activity                                                           | 1.88E-08                       | 62                                 |
| GO: Molecular Function                                                           | GO:0016818 | hydrolase activity, acting on acid anhydrides, in phosphorus-containing anhydrides | 1.88E-08                       | 62                                 |
| GO: Molecular Function                                                           | GO:0016817 | hydrolase activity, acting on acid anhydrides                                      | 1.88E-08                       | 62                                 |
| GO: Molecular Function                                                           | GO:0003729 | mRNA binding                                                                       | 7.706E-43                      | 60                                 |
| GO: Molecular Function                                                           | GO:0017111 | nucleoside-triphosphatase activity                                                 | 9.789E-08                      | 58                                 |
| GO: Molecular Function                                                           | GO:0019900 | kinase binding                                                                     | 0.001287                       | 41                                 |
| GO: Molecular Function                                                           | GO:0042803 | protein homodimerization activity                                                  | 0.0382                         | 40                                 |
| GO: Molecular Function                                                           | GO:0019901 | protein kinase binding                                                             | 0.001219                       | 38                                 |

|                        |            |                                          |            |    |
|------------------------|------------|------------------------------------------|------------|----|
| GO: Molecular Function | GO:0016887 | ATPase activity                          | 0.00002187 | 35 |
| GO: Molecular Function | GO:0019843 | rRNA binding                             | 3.726E-31  | 34 |
| GO: Molecular Function | GO:0003682 | chromatin binding                        | 0.005641   | 31 |
| GO: Molecular Function | GO:0008134 | transcription factor binding             | 0.03041    | 31 |
| GO: Molecular Function | GO:0042623 | ATPase activity, coupled                 | 0.0003794  | 26 |
| GO: Molecular Function | GO:0019001 | guanyl nucleotide binding                | 0.005549   | 26 |
| GO: Molecular Function | GO:0032561 | guanyl ribonucleotide binding            | 0.01121    | 25 |
| GO: Molecular Function | GO:0051082 | unfolded protein binding                 | 1.465E-12  | 24 |
| GO: Molecular Function | GO:0005525 | GTP binding                              | 0.02131    | 23 |
| GO: Molecular Function | GO:0043021 | ribonucleoprotein complex binding        | 2.518E-09  | 22 |
| GO: Molecular Function | GO:0003725 | double-stranded RNA binding              | 1.657E-13  | 21 |
| GO: Molecular Function | GO:0003924 | GTPase activity                          | 0.0003711  | 21 |
| GO: Molecular Function | GO:0031625 | ubiquitin protein ligase binding         | 0.01222    | 19 |
| GO: Molecular Function | GO:0044389 | ubiquitin-like protein ligase binding    | 0.01418    | 19 |
| GO: Molecular Function | GO:0003730 | mRNA 3'-UTR binding                      | 2.403E-11  | 17 |
| GO: Molecular Function | GO:0003727 | single-stranded RNA binding              | 3.443E-08  | 17 |
| GO: Molecular Function | GO:0004386 | helicase activity                        | 0.0005742  | 17 |
| GO: Molecular Function | GO:0070035 | purine NTP-dependent helicase activity   | 0.00001442 | 16 |
| GO: Molecular Function | GO:0008026 | ATP-dependent helicase activity          | 0.00001442 | 16 |
| GO: Molecular Function | GO:0003697 | single-stranded DNA binding              | 0.00002451 | 15 |
| GO: Molecular Function | GO:0005200 | structural constituent of cytoskeleton   | 0.00004594 | 15 |
| GO: Molecular Function | GO:0001047 | core promoter binding                    | 0.008752   | 14 |
| GO: Molecular Function | GO:0019902 | phosphatase binding                      | 0.02478    | 14 |
| GO: Molecular Function | GO:0008135 | translation factor activity, RNA binding | 0.0001053  | 13 |
| GO: Molecular Function | GO:0008186 | RNA-dependent ATPase activity            | 0.00002451 | 12 |
| GO: Molecular Function | GO:0004004 | ATP-dependent RNA helicase activity      | 0.00002451 | 12 |
| GO: Molecular Function | GO:0003724 | RNA helicase activity                    | 0.00008453 | 12 |
| GO: Molecular Function | GO:0046332 | SMAD binding                             | 0.0001053  | 12 |
| GO: Molecular Function | GO:0031072 | heat shock protein binding               | 0.001946   | 12 |
| GO: Molecular Function | GO:0042826 | histone deacetylase binding              | 0.003781   | 12 |

|                        |            |                                                               |             |    |
|------------------------|------------|---------------------------------------------------------------|-------------|----|
| GO: Molecular Function | GO:0031490 | chromatin DNA binding                                         | 0.001182    | 11 |
| GO: Molecular Function | GO:0036002 | pre-mRNA binding                                              | 1.169E-07   | 10 |
| GO: Molecular Function | GO:0035326 | enhancer binding                                              | 0.0194      | 10 |
| GO: Molecular Function | GO:0047485 | protein N-terminus binding                                    | 0.03401     | 10 |
| GO: Molecular Function | GO:0045182 | translation regulator activity                                | 0.000108    | 9  |
| GO: Molecular Function | GO:0000049 | tRNA binding                                                  | 0.0003711   | 9  |
| GO: Molecular Function | GO:0016209 | antioxidant activity                                          | 0.007895    | 9  |
| GO: Molecular Function | GO:0070180 | large ribosomal subunit rRNA binding                          | 4.124E-09   | 8  |
| GO: Molecular Function | GO:0003746 | translation elongation factor activity                        | 0.000004572 | 8  |
| GO: Molecular Function | GO:0070717 | poly-purine tract binding                                     | 0.00001976  | 8  |
| GO: Molecular Function | GO:0004722 | protein serine/threonine phosphatase activity                 | 0.01418     | 8  |
| GO: Molecular Function | GO:0002039 | p53 binding                                                   | 0.0194      | 8  |
| GO: Molecular Function | GO:0048027 | mRNA 5'-UTR binding                                           | 4.187E-07   | 7  |
| GO: Molecular Function | GO:0008187 | poly-pyrimidine tract binding                                 | 0.00007997  | 7  |
| GO: Molecular Function | GO:0042162 | telomeric DNA binding                                         | 0.0007069   | 7  |
| GO: Molecular Function | GO:0004812 | aminoacyl-tRNA ligase activity                                | 0.005549    | 7  |
| GO: Molecular Function | GO:0016875 | ligase activity, forming carbon-oxygen bonds                  | 0.005549    | 7  |
| GO: Molecular Function | GO:0043022 | ribosome binding                                              | 0.01561     | 7  |
| GO: Molecular Function | GO:0003678 | DNA helicase activity                                         | 0.03642     | 7  |
| GO: Molecular Function | GO:0000979 | RNA polymerase II core promoter sequence-specific DNA binding | 0.03805     | 7  |
| GO: Molecular Function | GO:0008097 | 5S rRNA binding                                               | 0.000000341 | 6  |
| GO: Molecular Function | GO:0008143 | poly(A) binding                                               | 0.0001805   | 6  |
| GO: Molecular Function | GO:0008266 | poly(U) RNA binding                                           | 0.0002536   | 6  |
| GO: Molecular Function | GO:0017091 | AU-rich element binding                                       | 0.001048    | 6  |
| GO: Molecular Function | GO:0043531 | ADP binding                                                   | 0.01761     | 6  |
| GO: Molecular Function | GO:0016684 | oxidoreductase activity, acting on peroxide as acceptor       | 0.03041     | 6  |
| GO: Molecular Function | GO:0004003 | ATP-dependent DNA helicase activity                           | 0.03041     | 6  |
| GO: Molecular Function | GO:0030331 | estrogen receptor binding                                     | 0.03041     | 6  |
| GO: Molecular Function | GO:0051920 | peroxiredoxin activity                                        | 0.00004049  | 5  |
| GO: Molecular Function | GO:0032552 | deoxyribonucleotide binding                                   | 0.00004049  | 5  |



|                        |            |                                                                                           |           |   |
|------------------------|------------|-------------------------------------------------------------------------------------------|-----------|---|
| GO: Molecular Function | GO:0005072 | transforming growth factor beta receptor, cytoplasmic mediator activity                   | 0.0001418 | 5 |
| GO: Molecular Function | GO:0019103 | pyrimidine nucleotide binding                                                             | 0.0002434 | 5 |
| GO: Molecular Function | GO:0060590 | ATPase regulator activity                                                                 | 0.02878   | 5 |
| GO: Molecular Function | GO:0030544 | Hsp70 protein binding                                                                     | 0.03465   | 5 |
| GO: Molecular Function | GO:0051059 | NF-kappaB binding                                                                         | 0.03764   | 5 |
| GO: Molecular Function | GO:0016814 | hydrolase activity, acting on carbon-nitrogen (but not peptide) bonds, in cyclic amidines | 0.03764   | 5 |
| GO: Molecular Function | GO:0017069 | snRNA binding                                                                             | 0.03764   | 5 |
| GO: Molecular Function | GO:0004532 | exoribonuclease activity                                                                  | 0.0415    | 5 |
| GO: Molecular Function | GO:0030618 | transforming growth factor beta receptor, pathway-specific cytoplasmic mediator activity  | 0.0001053 | 4 |
| GO: Molecular Function | GO:0050733 | RS domain binding                                                                         | 0.0005742 | 4 |
| GO: Molecular Function | GO:0070181 | small ribosomal subunit rRNA binding                                                      | 0.001048  | 4 |
| GO: Molecular Function | GO:0008494 | translation activator activity                                                            | 0.002685  | 4 |
| GO: Molecular Function | GO:0046933 | proton-transporting ATP synthase activity, rotational mechanism                           | 0.003999  | 4 |
| GO: Molecular Function | GO:0070410 | co-SMAD binding                                                                           | 0.005465  | 4 |
| GO: Molecular Function | GO:0044183 | protein binding involved in protein folding                                               | 0.01162   | 4 |
| GO: Molecular Function | GO:0023026 | MHC class II protein complex binding                                                      | 0.01424   | 4 |
| GO: Molecular Function | GO:0023023 | MHC protein complex binding                                                               | 0.026     | 4 |
| GO: Molecular Function | GO:0042288 | MHC class I protein binding                                                               | 0.0337    | 4 |
| GO: Molecular Function | GO:0090079 | translation regulator activity, nucleic acid binding                                      | 0.03764   | 4 |
| GO: Molecular Function | GO:0070412 | R-SMAD binding                                                                            | 0.04824   | 4 |
| GO: Molecular Function | GO:1990932 | 5.8S rRNA binding                                                                         | 0.0005745 | 3 |
| GO: Molecular Function | GO:0002134 | UTP binding                                                                               | 0.001913  | 3 |
| GO: Molecular Function | GO:0032551 | pyrimidine ribonucleoside binding                                                         | 0.001913  | 3 |
| GO: Molecular Function | GO:0004826 | phenylalanine-tRNA ligase activity                                                        | 0.00417   | 3 |
| GO: Molecular Function | GO:0001884 | pyrimidine nucleoside binding                                                             | 0.00417   | 3 |
| GO: Molecular Function | GO:1990446 | U1 snRNP binding                                                                          | 0.00417   | 3 |
| GO: Molecular Function | GO:0032557 | pyrimidine ribonucleotide binding                                                         | 0.00417   | 3 |
| GO: Molecular Function | GO:0008379 | thioredoxin peroxidase activity                                                           | 0.00745   | 3 |
| GO: Molecular Function | GO:0032554 | purine deoxyribonucleotide binding                                                        | 0.00745   | 3 |
| GO: Molecular Function | GO:0008312 | 7S RNA binding                                                                            | 0.01162   | 3 |

|                             |            |                                                          |            |     |
|-----------------------------|------------|----------------------------------------------------------|------------|-----|
| GO: Molecular Function      | GO:1990247 | N6-methyladenosine-containing RNA binding                | 0.01162    | 3   |
| GO: Molecular Function      | GO:0070990 | snRNP binding                                            | 0.01162    | 3   |
| GO: Molecular Function      | GO:0001094 | TFIID-class transcription factor binding                 | 0.01162    | 3   |
| GO: Molecular Function      | GO:0001091 | RNA polymerase II basal transcription factor binding     | 0.01648    | 3   |
| GO: Molecular Function      | GO:0000774 | adenyl-nucleotide exchange factor activity               | 0.02926    | 3   |
| GO: Molecular Function      | GO:0035613 | RNA stem-loop binding                                    | 0.02926    | 3   |
| GO: Molecular Function      | GO:0030235 | nitric-oxide synthase regulator activity                 | 0.02926    | 3   |
| GO: Molecular Function      | GO:0070411 | I-SMAD binding                                           | 0.03642    | 3   |
| GO: Molecular Function      | GO:0098847 | sequence-specific single stranded DNA binding            | 0.04425    | 3   |
| GO: Molecular Function      | GO:0002135 | CTP binding                                              | 0.01162    | 2   |
| GO: Molecular Function      | GO:0003938 | IMP dehydrogenase activity                               | 0.01162    | 2   |
| GO: Molecular Function      | GO:0032556 | pyrimidine deoxyribonucleotide binding                   | 0.01162    | 2   |
| GO: Molecular Function      | GO:0004487 | methylenetetrahydrofolate dehydrogenase (NAD+) activity  | 0.02794    | 2   |
| GO: Molecular Function      | GO:1990825 | sequence-specific mRNA binding                           | 0.02794    | 2   |
| GO: Molecular Function      | GO:0004827 | proline-tRNA ligase activity                             | 0.02794    | 2   |
| GO: Molecular Function      | GO:1990829 | C-rich single-stranded DNA binding                       | 0.02794    | 2   |
| GO: Molecular Function      | GO:0017098 | sulfonylurea receptor binding                            | 0.02794    | 2   |
| GO: Molecular Function      | GO:0032564 | dATP binding                                             | 0.04425    | 2   |
| GO: Molecular Function      | GO:0004477 | methenyltetrahydrofolate cyclohydrolase activity         | 0.04425    | 2   |
| GO: Molecular Function      | GO:0004329 | formate-tetrahydrofolate ligase activity                 | 0.04425    | 2   |
| GO: Molecular Function      | GO:1990715 | mRNA CDS binding                                         | 0.04425    | 2   |
| GO: Molecular Function      | GO:0004488 | methylenetetrahydrofolate dehydrogenase (NADP+) activity | 0.04425    | 2   |
| <b>Biological Processes</b> |            |                                                          |            |     |
| GO: Biological Process      | GO:1901566 | organonitrogen compound biosynthetic process             | 1.777E-83  | 208 |
| GO: Biological Process      | GO:0006396 | RNA processing                                           | 2.204E-111 | 197 |
| GO: Biological Process      | GO:0043603 | cellular amide metabolic process                         | 7.743E-95  | 190 |
| GO: Biological Process      | GO:0043604 | amide biosynthetic process                               | 1.413E-112 | 186 |
| GO: Biological Process      | GO:0006518 | peptide metabolic process                                | 1.16E-102  | 183 |
| GO: Biological Process      | GO:0006412 | translation                                              | 1.359E-120 | 182 |
| GO: Biological Process      | GO:0043043 | peptide biosynthetic process                             | 2.881E-117 | 182 |

|                        |            |                                                            |            |     |
|------------------------|------------|------------------------------------------------------------|------------|-----|
| GO: Biological Process | GO:0016071 | mRNA metabolic process                                     | 1.287E-116 | 178 |
| GO: Biological Process | GO:0044248 | cellular catabolic process                                 | 4.033E-29  | 153 |
| GO: Biological Process | GO:1901575 | organic substance catabolic process                        | 1.816E-25  | 150 |
| GO: Biological Process | GO:0070727 | cellular macromolecule localization                        | 4.168E-31  | 149 |
| GO: Biological Process | GO:0034613 | cellular protein localization                              | 1.019E-29  | 146 |
| GO: Biological Process | GO:0015031 | protein transport                                          | 1.568E-18  | 137 |
| GO: Biological Process | GO:0065003 | protein-containing complex assembly                        | 1.235E-20  | 136 |
| GO: Biological Process | GO:0009057 | macromolecule catabolic process                            | 9.338E-36  | 132 |
| GO: Biological Process | GO:0033365 | protein localization to organelle                          | 5.944E-49  | 131 |
| GO: Biological Process | GO:0022613 | ribonucleoprotein complex biogenesis                       | 2.351E-85  | 130 |
| GO: Biological Process | GO:0044419 | interspecies interaction between organisms                 | 9.075E-55  | 130 |
| GO: Biological Process | GO:0044403 | symbiont process                                           | 9.075E-55  | 130 |
| GO: Biological Process | GO:0044764 | multi-organism cellular process                            | 3.465E-56  | 129 |
| GO: Biological Process | GO:0034660 | ncRNA metabolic process                                    | 1.914E-72  | 128 |
| GO: Biological Process | GO:0016032 | viral process                                              | 3.024E-56  | 128 |
| GO: Biological Process | GO:0044265 | cellular macromolecule catabolic process                   | 7.624E-43  | 127 |
| GO: Biological Process | GO:0006886 | intracellular protein transport                            | 2.107E-32  | 120 |
| GO: Biological Process | GO:0072594 | establishment of protein localization to organelle         | 4.327E-54  | 119 |
| GO: Biological Process | GO:0034655 | nucleobase-containing compound catabolic process           | 1.919E-74  | 115 |
| GO: Biological Process | GO:0044270 | cellular nitrogen compound catabolic process               | 3.025E-69  | 115 |
| GO: Biological Process | GO:0046700 | heterocycle catabolic process                              | 4.917E-69  | 115 |
| GO: Biological Process | GO:0019439 | aromatic compound catabolic process                        | 6.108E-68  | 115 |
| GO: Biological Process | GO:1901361 | organic cyclic compound catabolic process                  | 3.371E-64  | 115 |
| GO: Biological Process | GO:0006605 | protein targeting                                          | 7.036E-45  | 112 |
| GO: Biological Process | GO:0034470 | ncRNA processing                                           | 2.537E-72  | 111 |
| GO: Biological Process | GO:0051173 | positive regulation of nitrogen compound metabolic process | 7.682E-09  | 111 |
| GO: Biological Process | GO:0061024 | membrane organization                                      | 1.891E-25  | 108 |
| GO: Biological Process | GO:0042254 | ribosome biogenesis                                        | 4.68E-76   | 105 |
| GO: Biological Process | GO:0019058 | viral life cycle                                           | 4.296E-59  | 104 |
| GO: Biological Process | GO:0051172 | negative regulation of nitrogen compound metabolic process | 9.169E-11  | 104 |

|                        |            |                                                                         |             |     |
|------------------------|------------|-------------------------------------------------------------------------|-------------|-----|
| GO: Biological Process | GO:0006401 | RNA catabolic process                                                   | 7.224E-86   | 102 |
| GO: Biological Process | GO:0010628 | positive regulation of gene expression                                  | 0.000001509 | 101 |
| GO: Biological Process | GO:0010629 | negative regulation of gene expression                                  | 3.059E-09   | 99  |
| GO: Biological Process | GO:0006402 | mRNA catabolic process                                                  | 8.669E-87   | 98  |
| GO: Biological Process | GO:0072657 | protein localization to membrane                                        | 4.033E-46   | 97  |
| GO: Biological Process | GO:0031328 | positive regulation of cellular biosynthetic process                    | 0.00005648  | 96  |
| GO: Biological Process | GO:0009891 | positive regulation of biosynthetic process                             | 0.0001241   | 96  |
| GO: Biological Process | GO:0006364 | rRNA processing                                                         | 7.725E-74   | 95  |
| GO: Biological Process | GO:0016072 | rRNA metabolic process                                                  | 1.4E-72     | 95  |
| GO: Biological Process | GO:0006413 | translational initiation                                                | 5.611E-87   | 94  |
| GO: Biological Process | GO:0000956 | nuclear-transcribed mRNA catabolic process                              | 5.987E-85   | 94  |
| GO: Biological Process | GO:0090150 | establishment of protein localization to membrane                       | 5.17E-56    | 94  |
| GO: Biological Process | GO:0034622 | cellular protein-containing complex assembly                            | 5.091E-20   | 93  |
| GO: Biological Process | GO:0051276 | chromosome organization                                                 | 9.413E-15   | 93  |
| GO: Biological Process | GO:0009890 | negative regulation of biosynthetic process                             | 3.209E-07   | 93  |
| GO: Biological Process | GO:0010557 | positive regulation of macromolecule biosynthetic process               | 0.00001272  | 93  |
| GO: Biological Process | GO:0045935 | positive regulation of nucleobase-containing compound metabolic process | 0.0001323   | 91  |
| GO: Biological Process | GO:0031327 | negative regulation of cellular biosynthetic process                    | 0.000001069 | 90  |
| GO: Biological Process | GO:0044033 | multi-organism metabolic process                                        | 1.863E-76   | 89  |
| GO: Biological Process | GO:0010558 | negative regulation of macromolecule biosynthetic process               | 3.323E-07   | 89  |
| GO: Biological Process | GO:0019080 | viral gene expression                                                   | 2.239E-78   | 87  |
| GO: Biological Process | GO:0000184 | nuclear-transcribed mRNA catabolic process, nonsense-mediated decay     | 4.251E-100  | 86  |
| GO: Biological Process | GO:0008380 | RNA splicing                                                            | 2.953E-44   | 85  |
| GO: Biological Process | GO:0006397 | mRNA processing                                                         | 4.903E-38   | 85  |
| GO: Biological Process | GO:0019083 | viral transcription                                                     | 8.866E-77   | 84  |
| GO: Biological Process | GO:2000113 | negative regulation of cellular macromolecule biosynthetic process      | 8.432E-07   | 84  |
| GO: Biological Process | GO:0006612 | protein targeting to membrane                                           | 5.632E-71   | 83  |
| GO: Biological Process | GO:0006614 | SRP-dependent cotranslational protein targeting to membrane             | 8.333E-107  | 81  |
| GO: Biological Process | GO:0006613 | cotranslational protein targeting to membrane                           | 1.147E-101  | 81  |
| GO: Biological Process | GO:0045047 | protein targeting to ER                                                 | 4.819E-101  | 81  |

|                        |            |                                                                                      |             |    |
|------------------------|------------|--------------------------------------------------------------------------------------|-------------|----|
| GO: Biological Process | GO:0072599 | establishment of protein localization to endoplasmic reticulum                       | 1.389E-98   | 81 |
| GO: Biological Process | GO:0070972 | protein localization to endoplasmic reticulum                                        | 6.724E-89   | 81 |
| GO: Biological Process | GO:0045934 | negative regulation of nucleobase-containing compound metabolic process              | 0.00002718  | 81 |
| GO: Biological Process | GO:0012501 | programmed cell death                                                                | 0.04574     | 81 |
| GO: Biological Process | GO:0007049 | cell cycle                                                                           | 0.01019     | 79 |
| GO: Biological Process | GO:0010608 | posttranscriptional regulation of gene expression                                    | 1.216E-30   | 76 |
| GO: Biological Process | GO:0033043 | regulation of organelle organization                                                 | 6.243E-08   | 76 |
| GO: Biological Process | GO:0051253 | negative regulation of RNA metabolic process                                         | 0.0000168   | 76 |
| GO: Biological Process | GO:0051254 | positive regulation of RNA metabolic process                                         | 0.003805    | 75 |
| GO: Biological Process | GO:0000375 | RNA splicing, via transesterification reactions                                      | 2.754E-42   | 74 |
| GO: Biological Process | GO:0080134 | regulation of response to stress                                                     | 0.004583    | 74 |
| GO: Biological Process | GO:0000398 | mRNA splicing, via spliceosome                                                       | 1.094E-41   | 73 |
| GO: Biological Process | GO:0000377 | RNA splicing, via transesterification reactions with bulged adenosine as nucleophile | 1.094E-41   | 73 |
| GO: Biological Process | GO:0010941 | regulation of cell death                                                             | 0.03585     | 71 |
| GO: Biological Process | GO:0022402 | cell cycle process                                                                   | 0.0008821   | 70 |
| GO: Biological Process | GO:0051247 | positive regulation of protein metabolic process                                     | 0.03139     | 70 |
| GO: Biological Process | GO:0032270 | positive regulation of cellular protein metabolic process                            | 0.01291     | 69 |
| GO: Biological Process | GO:0006259 | DNA metabolic process                                                                | 0.000000418 | 65 |
| GO: Biological Process | GO:0051130 | positive regulation of cellular component organization                               | 0.000946    | 65 |
| GO: Biological Process | GO:0007005 | mitochondrion organization                                                           | 8.852E-10   | 61 |
| GO: Biological Process | GO:0051248 | negative regulation of protein metabolic process                                     | 0.001477    | 61 |
| GO: Biological Process | GO:1902679 | negative regulation of RNA biosynthetic process                                      | 0.01716     | 61 |
| GO: Biological Process | GO:1903507 | negative regulation of nucleic acid-templated transcription                          | 0.01996     | 60 |
| GO: Biological Process | GO:0032269 | negative regulation of cellular protein metabolic process                            | 0.0009289   | 59 |
| GO: Biological Process | GO:0006417 | regulation of translation                                                            | 2.847E-23   | 57 |
| GO: Biological Process | GO:0034248 | regulation of cellular amide metabolic process                                       | 2.925E-21   | 57 |
| GO: Biological Process | GO:0000278 | mitotic cell cycle                                                                   | 0.0003045   | 57 |
| GO: Biological Process | GO:1903047 | mitotic cell cycle process                                                           | 0.00005299  | 56 |
| GO: Biological Process | GO:0045892 | negative regulation of transcription, DNA-templated                                  | 0.04663     | 56 |
| GO: Biological Process | GO:0006913 | nucleocytoplasmic transport                                                          | 1.562E-14   | 55 |

|                        |            |                                                              |            |    |
|------------------------|------------|--------------------------------------------------------------|------------|----|
| GO: Biological Process | GO:0051169 | nuclear transport                                            | 3.119E-14  | 55 |
| GO: Biological Process | GO:0022411 | cellular component disassembly                               | 5.224E-09  | 54 |
| GO: Biological Process | GO:0022618 | ribonucleoprotein complex assembly                           | 2.546E-30  | 52 |
| GO: Biological Process | GO:0071826 | ribonucleoprotein complex subunit organization               | 3.008E-29  | 52 |
| GO: Biological Process | GO:0010638 | positive regulation of organelle organization                | 2.695E-08  | 50 |
| GO: Biological Process | GO:0006325 | chromatin organization                                       | 0.00002333 | 50 |
| GO: Biological Process | GO:0080135 | regulation of cellular response to stress                    | 0.0002608  | 46 |
| GO: Biological Process | GO:0006403 | RNA localization                                             | 9.369E-23  | 45 |
| GO: Biological Process | GO:0071705 | nitrogen compound transport                                  | 0.02776    | 43 |
| GO: Biological Process | GO:0070201 | regulation of establishment of protein localization          | 0.03416    | 43 |
| GO: Biological Process | GO:0006414 | translational elongation                                     | 1.008E-28  | 42 |
| GO: Biological Process | GO:0045087 | innate immune response                                       | 0.02475    | 42 |
| GO: Biological Process | GO:1903827 | regulation of cellular protein localization                  | 0.00005699 | 41 |
| GO: Biological Process | GO:0070925 | organelle assembly                                           | 0.000396   | 41 |
| GO: Biological Process | GO:0055086 | nucleobase-containing small molecule metabolic process       | 0.008044   | 41 |
| GO: Biological Process | GO:0006974 | cellular response to DNA damage stimulus                     | 0.01726    | 41 |
| GO: Biological Process | GO:0032984 | protein-containing complex disassembly                       | 4.02E-14   | 40 |
| GO: Biological Process | GO:0044770 | cell cycle phase transition                                  | 0.00002349 | 40 |
| GO: Biological Process | GO:0044772 | mitotic cell cycle phase transition                          | 0.00004619 | 38 |
| GO: Biological Process | GO:0009894 | regulation of catabolic process                              | 0.04186    | 38 |
| GO: Biological Process | GO:0043624 | cellular protein complex disassembly                         | 1.003E-15  | 37 |
| GO: Biological Process | GO:0010942 | positive regulation of cell death                            | 0.01532    | 37 |
| GO: Biological Process | GO:1903829 | positive regulation of cellular protein localization         | 1.541E-07  | 36 |
| GO: Biological Process | GO:0007017 | microtubule-based process                                    | 0.01188    | 36 |
| GO: Biological Process | GO:0033044 | regulation of chromosome organization                        | 9.923E-10  | 35 |
| GO: Biological Process | GO:0006753 | nucleoside phosphate metabolic process                       | 0.04326    | 35 |
| GO: Biological Process | GO:0051052 | regulation of DNA metabolic process                          | 5.988E-07  | 34 |
| GO: Biological Process | GO:1904951 | positive regulation of establishment of protein localization | 0.003713   | 34 |
| GO: Biological Process | GO:0043065 | positive regulation of apoptotic process                     | 0.02686    | 34 |
| GO: Biological Process | GO:0043068 | positive regulation of programmed cell death                 | 0.02984    | 34 |

|                        |            |                                                         |             |    |
|------------------------|------------|---------------------------------------------------------|-------------|----|
| GO: Biological Process | GO:0031329 | regulation of cellular catabolic process                | 0.03416     | 34 |
| GO: Biological Process | GO:0051301 | cell division                                           | 0.03682     | 34 |
| GO: Biological Process | GO:0032386 | regulation of intracellular transport                   | 0.03897     | 34 |
| GO: Biological Process | GO:0032543 | mitochondrial translation                               | 1.854E-20   | 33 |
| GO: Biological Process | GO:0034504 | protein localization to nucleus                         | 0.000007289 | 33 |
| GO: Biological Process | GO:0071103 | DNA conformation change                                 | 1.562E-08   | 32 |
| GO: Biological Process | GO:0010564 | regulation of cell cycle process                        | 0.02596     | 32 |
| GO: Biological Process | GO:0006415 | translational termination                               | 4.856E-21   | 31 |
| GO: Biological Process | GO:0050657 | nucleic acid transport                                  | 4.215E-13   | 31 |
| GO: Biological Process | GO:0050658 | RNA transport                                           | 4.215E-13   | 31 |
| GO: Biological Process | GO:0051236 | establishment of RNA localization                       | 6.704E-13   | 31 |
| GO: Biological Process | GO:0015931 | nucleobase-containing compound transport                | 6.015E-11   | 31 |
| GO: Biological Process | GO:0006457 | protein folding                                         | 6.221E-10   | 31 |
| GO: Biological Process | GO:0006260 | DNA replication                                         | 0.000004698 | 31 |
| GO: Biological Process | GO:0016569 | covalent chromatin modification                         | 0.001114    | 31 |
| GO: Biological Process | GO:0043900 | regulation of multi-organism process                    | 0.004976    | 31 |
| GO: Biological Process | GO:0070125 | mitochondrial translational elongation                  | 4.566E-22   | 30 |
| GO: Biological Process | GO:0051168 | nuclear export                                          | 9.852E-12   | 30 |
| GO: Biological Process | GO:0016570 | histone modification                                    | 0.001412    | 30 |
| GO: Biological Process | GO:0051259 | protein complex oligomerization                         | 0.02079     | 30 |
| GO: Biological Process | GO:0071407 | cellular response to organic cyclic compound            | 0.03223     | 30 |
| GO: Biological Process | GO:0070126 | mitochondrial translational termination                 | 1.098E-20   | 29 |
| GO: Biological Process | GO:0060249 | anatomical structure homeostasis                        | 0.00058     | 29 |
| GO: Biological Process | GO:0043488 | regulation of mRNA stability                            | 4.184E-13   | 28 |
| GO: Biological Process | GO:0043487 | regulation of RNA stability                             | 8.295E-13   | 28 |
| GO: Biological Process | GO:0006281 | DNA repair                                              | 0.03483     | 28 |
| GO: Biological Process | GO:1903649 | regulation of cytoplasmic transport                     | 0.03667     | 28 |
| GO: Biological Process | GO:1903311 | regulation of mRNA metabolic process                    | 2.315E-13   | 27 |
| GO: Biological Process | GO:0017148 | negative regulation of translation                      | 3.537E-12   | 27 |
| GO: Biological Process | GO:0034249 | negative regulation of cellular amide metabolic process | 1.554E-11   | 27 |

|                        |            |                                                         |             |    |
|------------------------|------------|---------------------------------------------------------|-------------|----|
| GO: Biological Process | GO:0051170 | import into nucleus                                     | 0.00008097  | 27 |
| GO: Biological Process | GO:0018205 | peptidyl-lysine modification                            | 0.006558    | 27 |
| GO: Biological Process | GO:0040029 | regulation of gene expression, epigenetic               | 0.000007851 | 26 |
| GO: Biological Process | GO:0006520 | cellular amino acid metabolic process                   | 0.006183    | 26 |
| GO: Biological Process | GO:0009116 | nucleoside metabolic process                            | 0.008695    | 26 |
| GO: Biological Process | GO:0009615 | response to virus                                       | 0.01349     | 26 |
| GO: Biological Process | GO:1901657 | glycosyl compound metabolic process                     | 0.01651     | 26 |
| GO: Biological Process | GO:0042255 | ribosome assembly                                       | 4.299E-21   | 25 |
| GO: Biological Process | GO:0042273 | ribosomal large subunit biogenesis                      | 1.182E-20   | 25 |
| GO: Biological Process | GO:0043484 | regulation of RNA splicing                              | 2.128E-13   | 25 |
| GO: Biological Process | GO:0034250 | positive regulation of cellular amide metabolic process | 5.373E-12   | 25 |
| GO: Biological Process | GO:0032200 | telomere organization                                   | 5.069E-10   | 25 |
| GO: Biological Process | GO:0009123 | nucleoside monophosphate metabolic process              | 0.000256    | 25 |
| GO: Biological Process | GO:0002181 | cytoplasmic translation                                 | 1.961E-20   | 24 |
| GO: Biological Process | GO:0042274 | ribosomal small subunit biogenesis                      | 3.863E-18   | 24 |
| GO: Biological Process | GO:0045727 | positive regulation of translation                      | 9.564E-13   | 24 |
| GO: Biological Process | GO:0031123 | RNA 3'-end processing                                   | 1.628E-11   | 24 |
| GO: Biological Process | GO:0000723 | telomere maintenance                                    | 4.611E-10   | 24 |
| GO: Biological Process | GO:0051028 | mRNA transport                                          | 2.213E-09   | 24 |
| GO: Biological Process | GO:2001252 | positive regulation of chromosome organization          | 4.352E-09   | 24 |
| GO: Biological Process | GO:1900180 | regulation of protein localization to nucleus           | 0.00001063  | 24 |
| GO: Biological Process | GO:0032259 | methylation                                             | 0.00456     | 24 |
| GO: Biological Process | GO:0009119 | ribonucleoside metabolic process                        | 0.01726     | 24 |
| GO: Biological Process | GO:2001233 | regulation of apoptotic signaling pathway               | 0.02728     | 24 |
| GO: Biological Process | GO:0006353 | DNA-templated transcription, termination                | 3.55E-12    | 23 |
| GO: Biological Process | GO:0031647 | regulation of protein stability                         | 0.00004162  | 23 |
| GO: Biological Process | GO:0009161 | ribonucleoside monophosphate metabolic process          | 0.0008984   | 23 |
| GO: Biological Process | GO:0071824 | protein-DNA complex subunit organization                | 0.0003255   | 22 |
| GO: Biological Process | GO:0009167 | purine ribonucleoside monophosphate metabolic process   | 0.001293    | 22 |
| GO: Biological Process | GO:0009126 | purine nucleoside monophosphate metabolic process       | 0.001353    | 22 |



|                        |            |                                                        |             |    |
|------------------------|------------|--------------------------------------------------------|-------------|----|
| GO: Biological Process | GO:1901987 | regulation of cell cycle phase transition              | 0.01342     | 22 |
| GO: Biological Process | GO:0017038 | protein import                                         | 0.01971     | 22 |
| GO: Biological Process | GO:0050684 | regulation of mRNA processing                          | 1.223E-09   | 21 |
| GO: Biological Process | GO:0006405 | RNA export from nucleus                                | 5.28E-09    | 21 |
| GO: Biological Process | GO:0071426 | ribonucleoprotein complex export from nucleus          | 5.28E-09    | 21 |
| GO: Biological Process | GO:0071166 | ribonucleoprotein complex localization                 | 8.394E-09   | 21 |
| GO: Biological Process | GO:0006275 | regulation of DNA replication                          | 0.000003081 | 21 |
| GO: Biological Process | GO:0006399 | tRNA metabolic process                                 | 0.000006453 | 21 |
| GO: Biological Process | GO:0051054 | positive regulation of DNA metabolic process           | 0.00004199  | 21 |
| GO: Biological Process | GO:0044839 | cell cycle G2/M phase transition                       | 0.00004871  | 21 |
| GO: Biological Process | GO:0006323 | DNA packaging                                          | 0.00005241  | 21 |
| GO: Biological Process | GO:0071897 | DNA biosynthetic process                               | 0.0000747   | 21 |
| GO: Biological Process | GO:0065004 | protein-DNA complex assembly                           | 0.0001934   | 21 |
| GO: Biological Process | GO:0009266 | response to temperature stimulus                       | 0.0003781   | 21 |
| GO: Biological Process | GO:0043414 | macromolecule methylation                              | 0.002496    | 21 |
| GO: Biological Process | GO:0097193 | intrinsic apoptotic signaling pathway                  | 0.007922    | 21 |
| GO: Biological Process | GO:1901990 | regulation of mitotic cell cycle phase transition      | 0.01425     | 21 |
| GO: Biological Process | GO:0007059 | chromosome segregation                                 | 0.02287     | 21 |
| GO: Biological Process | GO:0010639 | negative regulation of organelle organization          | 0.02513     | 21 |
| GO: Biological Process | GO:0048024 | regulation of mRNA splicing, via spliceosome           | 1.623E-12   | 20 |
| GO: Biological Process | GO:1900182 | positive regulation of protein localization to nucleus | 3.662E-07   | 20 |
| GO: Biological Process | GO:0050821 | protein stabilization                                  | 5.907E-07   | 20 |
| GO: Biological Process | GO:0016458 | gene silencing                                         | 0.002848    | 20 |
| GO: Biological Process | GO:0006606 | protein import into nucleus                            | 0.01726     | 20 |
| GO: Biological Process | GO:0009165 | nucleotide biosynthetic process                        | 0.02984     | 20 |
| GO: Biological Process | GO:1901293 | nucleoside phosphate biosynthetic process              | 0.0319      | 20 |
| GO: Biological Process | GO:0051098 | regulation of binding                                  | 0.03897     | 20 |
| GO: Biological Process | GO:0006369 | termination of RNA polymerase II transcription         | 1.301E-12   | 19 |
| GO: Biological Process | GO:0031497 | chromatin assembly                                     | 0.00002049  | 19 |
| GO: Biological Process | GO:0006333 | chromatin assembly or disassembly                      | 0.0001667   | 19 |

|                        |            |                                                                            |             |    |
|------------------------|------------|----------------------------------------------------------------------------|-------------|----|
| GO: Biological Process | GO:0050792 | regulation of viral process                                                | 0.0001792   | 19 |
| GO: Biological Process | GO:0043903 | regulation of symbiosis, encompassing mutualism through parasitism         | 0.001213    | 19 |
| GO: Biological Process | GO:0046822 | regulation of nucleocytoplasmic transport                                  | 0.002809    | 19 |
| GO: Biological Process | GO:0000082 | G1/S transition of mitotic cell cycle                                      | 0.004709    | 19 |
| GO: Biological Process | GO:0044843 | cell cycle G1/S phase transition                                           | 0.007207    | 19 |
| GO: Biological Process | GO:0009141 | nucleoside triphosphate metabolic process                                  | 0.02717     | 19 |
| GO: Biological Process | GO:0032204 | regulation of telomere maintenance                                         | 9.169E-11   | 18 |
| GO: Biological Process | GO:0031124 | mRNA 3'-end processing                                                     | 1.584E-08   | 18 |
| GO: Biological Process | GO:1903900 | regulation of viral life cycle                                             | 0.0002404   | 18 |
| GO: Biological Process | GO:0000086 | G2/M transition of mitotic cell cycle                                      | 0.0009194   | 18 |
| GO: Biological Process | GO:0009895 | negative regulation of catabolic process                                   | 0.007288    | 18 |
| GO: Biological Process | GO:0000302 | response to reactive oxygen species                                        | 0.01333     | 18 |
| GO: Biological Process | GO:0090305 | nucleic acid phosphodiester bond hydrolysis                                | 0.02632     | 18 |
| GO: Biological Process | GO:0006839 | mitochondrial transport                                                    | 0.03465     | 18 |
| GO: Biological Process | GO:1903320 | regulation of protein modification by small protein conjugation or removal | 0.04326     | 18 |
| GO: Biological Process | GO:0010833 | telomere maintenance via telomere lengthening                              | 5.444E-10   | 17 |
| GO: Biological Process | GO:0009124 | nucleoside monophosphate biosynthetic process                              | 1.566E-07   | 17 |
| GO: Biological Process | GO:0034728 | nucleosome organization                                                    | 0.0005561   | 17 |
| GO: Biological Process | GO:0009408 | response to heat                                                           | 0.0005561   | 17 |
| GO: Biological Process | GO:0007179 | transforming growth factor beta receptor signaling pathway                 | 0.001249    | 17 |
| GO: Biological Process | GO:0001649 | osteoblast differentiation                                                 | 0.00948     | 17 |
| GO: Biological Process | GO:0071560 | cellular response to transforming growth factor beta stimulus              | 0.0129      | 17 |
| GO: Biological Process | GO:0071559 | response to transforming growth factor beta                                | 0.01424     | 17 |
| GO: Biological Process | GO:0034599 | cellular response to oxidative stress                                      | 0.02375     | 17 |
| GO: Biological Process | GO:0072331 | signal transduction by p53 class mediator                                  | 0.03764     | 17 |
| GO: Biological Process | GO:0009636 | response to toxic substance                                                | 0.04543     | 17 |
| GO: Biological Process | GO:0000245 | spliceosomal complex assembly                                              | 5.248E-10   | 16 |
| GO: Biological Process | GO:0006278 | RNA-dependent DNA biosynthetic process                                     | 4.278E-09   | 16 |
| GO: Biological Process | GO:0006406 | mRNA export from nucleus                                                   | 0.000005339 | 16 |
| GO: Biological Process | GO:0071427 | mRNA-containing ribonucleoprotein complex export from nucleus              | 0.000005339 | 16 |

|                        |            |                                                             |             |    |
|------------------------|------------|-------------------------------------------------------------|-------------|----|
| GO: Biological Process | GO:0006334 | nucleosome assembly                                         | 0.0002561   | 16 |
| GO: Biological Process | GO:0031047 | gene silencing by RNA                                       | 0.0007876   | 16 |
| GO: Biological Process | GO:0007623 | circadian rhythm                                            | 0.015       | 16 |
| GO: Biological Process | GO:0000819 | sister chromatid segregation                                | 0.02311     | 16 |
| GO: Biological Process | GO:0000075 | cell cycle checkpoint                                       | 0.03064     | 16 |
| GO: Biological Process | GO:0009156 | ribonucleoside monophosphate biosynthetic process           | 0.000001889 | 15 |
| GO: Biological Process | GO:2000278 | regulation of DNA biosynthetic process                      | 0.0000115   | 15 |
| GO: Biological Process | GO:0019079 | viral genome replication                                    | 0.0000168   | 15 |
| GO: Biological Process | GO:0051262 | protein tetramerization                                     | 0.001524    | 15 |
| GO: Biological Process | GO:2001242 | regulation of intrinsic apoptotic signaling pathway         | 0.002602    | 15 |
| GO: Biological Process | GO:0043902 | positive regulation of multi-organism process               | 0.004314    | 15 |
| GO: Biological Process | GO:0006479 | protein methylation                                         | 0.005864    | 15 |
| GO: Biological Process | GO:0008213 | protein alkylation                                          | 0.005864    | 15 |
| GO: Biological Process | GO:0070585 | protein localization to mitochondrion                       | 0.01437     | 15 |
| GO: Biological Process | GO:0010821 | regulation of mitochondrion organization                    | 0.04547     | 15 |
| GO: Biological Process | GO:1903312 | negative regulation of mRNA metabolic process               | 1.454E-09   | 14 |
| GO: Biological Process | GO:1904356 | regulation of telomere maintenance via telomere lengthening | 9.136E-09   | 14 |
| GO: Biological Process | GO:0007004 | telomere maintenance via telomerase                         | 4.45E-08    | 14 |
| GO: Biological Process | GO:0009168 | purine ribonucleoside monophosphate biosynthetic process    | 0.000001798 | 14 |
| GO: Biological Process | GO:0009127 | purine nucleoside monophosphate biosynthetic process        | 0.000001798 | 14 |
| GO: Biological Process | GO:0043331 | response to dsRNA                                           | 0.000009883 | 14 |
| GO: Biological Process | GO:0045740 | positive regulation of DNA replication                      | 0.00003229  | 14 |
| GO: Biological Process | GO:1902275 | regulation of chromatin organization                        | 0.01144     | 14 |
| GO: Biological Process | GO:0031330 | negative regulation of cellular catabolic process           | 0.02577     | 14 |
| GO: Biological Process | GO:0072655 | establishment of protein localization to mitochondrion      | 0.02678     | 14 |
| GO: Biological Process | GO:0009566 | fertilization                                               | 0.02754     | 14 |
| GO: Biological Process | GO:2001235 | positive regulation of apoptotic signaling pathway          | 0.03139     | 14 |
| GO: Biological Process | GO:0000028 | ribosomal small subunit assembly                            | 9.34E-14    | 13 |
| GO: Biological Process | GO:0033119 | negative regulation of RNA splicing                         | 1.392E-10   | 13 |
| GO: Biological Process | GO:0032210 | regulation of telomere maintenance via telomerase           | 2.519E-08   | 13 |

|                        |            |                                                                      |             |    |
|------------------------|------------|----------------------------------------------------------------------|-------------|----|
| GO: Biological Process | GO:0045069 | regulation of viral genome replication                               | 0.00002807  | 13 |
| GO: Biological Process | GO:0034605 | cellular response to heat                                            | 0.000971    | 13 |
| GO: Biological Process | GO:0009163 | nucleoside biosynthetic process                                      | 0.003929    | 13 |
| GO: Biological Process | GO:1901659 | glycosyl compound biosynthetic process                               | 0.004518    | 13 |
| GO: Biological Process | GO:0016571 | histone methylation                                                  | 0.005372    | 13 |
| GO: Biological Process | GO:0007338 | single fertilization                                                 | 0.00764     | 13 |
| GO: Biological Process | GO:0031056 | regulation of histone modification                                   | 0.008973    | 13 |
| GO: Biological Process | GO:0034614 | cellular response to reactive oxygen species                         | 0.01136     | 13 |
| GO: Biological Process | GO:0043901 | negative regulation of multi-organism process                        | 0.02475     | 13 |
| GO: Biological Process | GO:0048255 | mRNA stabilization                                                   | 1.791E-08   | 12 |
| GO: Biological Process | GO:0043489 | RNA stabilization                                                    | 2.538E-08   | 12 |
| GO: Biological Process | GO:0032206 | positive regulation of telomere maintenance                          | 4.783E-07   | 12 |
| GO: Biological Process | GO:2000573 | positive regulation of DNA biosynthetic process                      | 0.00001096  | 12 |
| GO: Biological Process | GO:1900034 | regulation of cellular response to heat                              | 0.00009238  | 12 |
| GO: Biological Process | GO:0032479 | regulation of type I interferon production                           | 0.004736    | 12 |
| GO: Biological Process | GO:0032606 | type I interferon production                                         | 0.005489    | 12 |
| GO: Biological Process | GO:0042455 | ribonucleoside biosynthetic process                                  | 0.006183    | 12 |
| GO: Biological Process | GO:1903747 | regulation of establishment of protein localization to mitochondrion | 0.01019     | 12 |
| GO: Biological Process | GO:0042177 | negative regulation of protein catabolic process                     | 0.01155     | 12 |
| GO: Biological Process | GO:0042542 | response to hydrogen peroxide                                        | 0.02446     | 12 |
| GO: Biological Process | GO:0007093 | mitotic cell cycle checkpoint                                        | 0.04585     | 12 |
| GO: Biological Process | GO:0000027 | ribosomal large subunit assembly                                     | 1.018E-09   | 11 |
| GO: Biological Process | GO:0048025 | negative regulation of mRNA splicing, via spliceosome                | 5.039E-09   | 11 |
| GO: Biological Process | GO:0032212 | positive regulation of telomere maintenance via telomerase           | 6.244E-08   | 11 |
| GO: Biological Process | GO:1904358 | positive regulation of telomere maintenance via telomere lengthening | 8.976E-08   | 11 |
| GO: Biological Process | GO:0050686 | negative regulation of mRNA processing                               | 3.375E-07   | 11 |
| GO: Biological Process | GO:0000380 | alternative mRNA splicing, via spliceosome                           | 0.00000465  | 11 |
| GO: Biological Process | GO:1903313 | positive regulation of mRNA metabolic process                        | 0.000008643 | 11 |
| GO: Biological Process | GO:0034502 | protein localization to chromosome                                   | 0.00006179  | 11 |
| GO: Biological Process | GO:0032508 | DNA duplex unwinding                                                 | 0.0004787   | 11 |

|                        |            |                                                                                     |             |    |
|------------------------|------------|-------------------------------------------------------------------------------------|-------------|----|
| GO: Biological Process | GO:0032392 | DNA geometric change                                                                | 0.0008308   | 11 |
| GO: Biological Process | GO:0031058 | positive regulation of histone modification                                         | 0.002154    | 11 |
| GO: Biological Process | GO:0048524 | positive regulation of viral process                                                | 0.002809    | 11 |
| GO: Biological Process | GO:1903844 | regulation of cellular response to transforming growth factor beta stimulus         | 0.006585    | 11 |
| GO: Biological Process | GO:0017015 | regulation of transforming growth factor beta receptor signaling pathway            | 0.006585    | 11 |
| GO: Biological Process | GO:0007062 | sister chromatid cohesion                                                           | 0.02446     | 11 |
| GO: Biological Process | GO:0008637 | apoptotic mitochondrial changes                                                     | 0.02678     | 11 |
| GO: Biological Process | GO:0031397 | negative regulation of protein ubiquitination                                       | 0.03139     | 11 |
| GO: Biological Process | GO:0016925 | protein sumoylation                                                                 | 0.04241     | 11 |
| GO: Biological Process | GO:1903321 | negative regulation of protein modification by small protein conjugation or removal | 0.04814     | 11 |
| GO: Biological Process | GO:1904874 | positive regulation of telomerase RNA localization to Cajal body                    | 1.028E-10   | 10 |
| GO: Biological Process | GO:1904872 | regulation of telomerase RNA localization to Cajal body                             | 1.028E-10   | 10 |
| GO: Biological Process | GO:0090672 | telomerase RNA localization                                                         | 2.565E-10   | 10 |
| GO: Biological Process | GO:0090670 | RNA localization to Cajal body                                                      | 2.565E-10   | 10 |
| GO: Biological Process | GO:0090671 | telomerase RNA localization to Cajal body                                           | 2.565E-10   | 10 |
| GO: Biological Process | GO:0033120 | positive regulation of RNA splicing                                                 | 0.000001233 | 10 |
| GO: Biological Process | GO:0042769 | DNA damage response, detection of DNA damage                                        | 0.000002998 | 10 |
| GO: Biological Process | GO:0000387 | spliceosomal snRNP assembly                                                         | 0.000006534 | 10 |
| GO: Biological Process | GO:0006446 | regulation of translational initiation                                              | 0.004567    | 10 |
| GO: Biological Process | GO:1903902 | positive regulation of viral life cycle                                             | 0.00585     | 10 |
| GO: Biological Process | GO:0046129 | purine ribonucleoside biosynthetic process                                          | 0.01679     | 10 |
| GO: Biological Process | GO:0042451 | purine nucleoside biosynthetic process                                              | 0.01679     | 10 |
| GO: Biological Process | GO:0098781 | ncRNA transcription                                                                 | 0.01781     | 10 |
| GO: Biological Process | GO:0007006 | mitochondrial membrane organization                                                 | 0.01781     | 10 |
| GO: Biological Process | GO:0071156 | regulation of cell cycle arrest                                                     | 0.02375     | 10 |
| GO: Biological Process | GO:0051053 | negative regulation of DNA metabolic process                                        | 0.03295     | 10 |
| GO: Biological Process | GO:1903749 | positive regulation of establishment of protein localization to mitochondrion       | 0.03457     | 10 |
| GO: Biological Process | GO:0042770 | signal transduction in response to DNA damage                                       | 0.04569     | 10 |
| GO: Biological Process | GO:0034101 | erythrocyte homeostasis                                                             | 0.04757     | 10 |
| GO: Biological Process | GO:0051340 | regulation of ligase activity                                                       | 0.04757     | 10 |

|                        |            |                                                                                          |             |   |
|------------------------|------------|------------------------------------------------------------------------------------------|-------------|---|
| GO: Biological Process | GO:0070198 | protein localization to chromosome, telomeric region                                     | 0.000002272 | 9 |
| GO: Biological Process | GO:0006376 | mRNA splice site selection                                                               | 0.000006079 | 9 |
| GO: Biological Process | GO:0000462 | maturation of SSU-rRNA from tricistronic rRNA transcript (SSU-rRNA, 5.8S rRNA, LSU-rRNA) | 0.00002349  | 9 |
| GO: Biological Process | GO:1901998 | toxin transport                                                                          | 0.0001637   | 9 |
| GO: Biological Process | GO:0030490 | maturation of SSU-rRNA                                                                   | 0.0001954   | 9 |
| GO: Biological Process | GO:0071359 | cellular response to dsRNA                                                               | 0.0003807   | 9 |
| GO: Biological Process | GO:0006418 | tRNA aminoacylation for protein translation                                              | 0.0003807   | 9 |
| GO: Biological Process | GO:0043039 | tRNA aminoacylation                                                                      | 0.0006012   | 9 |
| GO: Biological Process | GO:0043038 | amino acid activation                                                                    | 0.0006901   | 9 |
| GO: Biological Process | GO:0035195 | gene silencing by miRNA                                                                  | 0.0008966   | 9 |
| GO: Biological Process | GO:1903201 | regulation of oxidative stress-induced cell death                                        | 0.0008966   | 9 |
| GO: Biological Process | GO:0016441 | posttranscriptional gene silencing                                                       | 0.001477    | 9 |
| GO: Biological Process | GO:0035194 | posttranscriptional gene silencing by RNA                                                | 0.001477    | 9 |
| GO: Biological Process | GO:1900407 | regulation of cellular response to oxidative stress                                      | 0.004567    | 9 |
| GO: Biological Process | GO:0036473 | cell death in response to oxidative stress                                               | 0.006558    | 9 |
| GO: Biological Process | GO:1902882 | regulation of response to oxidative stress                                               | 0.007801    | 9 |
| GO: Biological Process | GO:1901607 | alpha-amino acid biosynthetic process                                                    | 0.01347     | 9 |
| GO: Biological Process | GO:0070301 | cellular response to hydrogen peroxide                                                   | 0.02326     | 9 |
| GO: Biological Process | GO:0008652 | cellular amino acid biosynthetic process                                                 | 0.03364     | 9 |
| GO: Biological Process | GO:1904869 | regulation of protein localization to Cajal body                                         | 4.497E-11   | 8 |
| GO: Biological Process | GO:1904871 | positive regulation of protein localization to Cajal body                                | 4.497E-11   | 8 |
| GO: Biological Process | GO:1990173 | protein localization to nucleoplasm                                                      | 3.395E-10   | 8 |
| GO: Biological Process | GO:1903405 | protein localization to nuclear body                                                     | 3.395E-10   | 8 |
| GO: Biological Process | GO:1904867 | protein localization to Cajal body                                                       | 3.395E-10   | 8 |
| GO: Biological Process | GO:1904816 | positive regulation of protein localization to chromosome, telomeric region              | 1.431E-08   | 8 |
| GO: Biological Process | GO:1904814 | regulation of protein localization to chromosome, telomeric region                       | 7.582E-08   | 8 |
| GO: Biological Process | GO:0070199 | establishment of protein localization to chromosome                                      | 0.000007835 | 8 |
| GO: Biological Process | GO:0000460 | maturation of 5.8S rRNA                                                                  | 0.0001098   | 8 |
| GO: Biological Process | GO:0009303 | rRNA transcription                                                                       | 0.000139    | 8 |

|                        |            |                                                                          |             |   |
|------------------------|------------|--------------------------------------------------------------------------|-------------|---|
| GO: Biological Process | GO:0000381 | regulation of alternative mRNA splicing, via spliceosome                 | 0.0002652   | 8 |
| GO: Biological Process | GO:0007339 | binding of sperm to zona pellucida                                       | 0.0003234   | 8 |
| GO: Biological Process | GO:0009112 | nucleobase metabolic process                                             | 0.0005634   | 8 |
| GO: Biological Process | GO:0010501 | RNA secondary structure unwinding                                        | 0.001232    | 8 |
| GO: Biological Process | GO:0035036 | sperm-egg recognition                                                    | 0.002172    | 8 |
| GO: Biological Process | GO:0051568 | histone H3-K4 methylation                                                | 0.004179    | 8 |
| GO: Biological Process | GO:0006360 | transcription by RNA polymerase I                                        | 0.008485    | 8 |
| GO: Biological Process | GO:0072401 | signal transduction involved in DNA integrity checkpoint                 | 0.01331     | 8 |
| GO: Biological Process | GO:0072422 | signal transduction involved in DNA damage checkpoint                    | 0.01331     | 8 |
| GO: Biological Process | GO:0009988 | cell-cell recognition                                                    | 0.01429     | 8 |
| GO: Biological Process | GO:0072395 | signal transduction involved in cell cycle checkpoint                    | 0.01429     | 8 |
| GO: Biological Process | GO:0032481 | positive regulation of type I interferon production                      | 0.02112     | 8 |
| GO: Biological Process | GO:0031571 | mitotic G1 DNA damage checkpoint                                         | 0.02292     | 8 |
| GO: Biological Process | GO:0044819 | mitotic G1/S transition checkpoint                                       | 0.02292     | 8 |
| GO: Biological Process | GO:0044783 | G1 DNA damage checkpoint                                                 | 0.02446     | 8 |
| GO: Biological Process | GO:0072527 | pyrimidine-containing compound metabolic process                         | 0.03465     | 8 |
| GO: Biological Process | GO:0051444 | negative regulation of ubiquitin-protein transferase activity            | 0.03639     | 8 |
| GO: Biological Process | GO:0045815 | positive regulation of gene expression, epigenetic                       | 0.03639     | 8 |
| GO: Biological Process | GO:0051352 | negative regulation of ligase activity                                   | 0.04114     | 8 |
| GO: Biological Process | GO:1903363 | negative regulation of cellular protein catabolic process                | 0.04367     | 8 |
| GO: Biological Process | GO:0071158 | positive regulation of cell cycle arrest                                 | 0.0463      | 8 |
| GO: Biological Process | GO:1904851 | positive regulation of establishment of protein localization to telomere | 3.38E-08    | 7 |
| GO: Biological Process | GO:0070203 | regulation of establishment of protein localization to telomere          | 1.051E-07   | 7 |
| GO: Biological Process | GO:0070202 | regulation of establishment of protein localization to chromosome        | 2.755E-07   | 7 |
| GO: Biological Process | GO:0070200 | establishment of protein localization to telomere                        | 0.000004267 | 7 |
| GO: Biological Process | GO:0046112 | nucleobase biosynthetic process                                          | 0.00001745  | 7 |
| GO: Biological Process | GO:0042026 | protein refolding                                                        | 0.0001049   | 7 |
| GO: Biological Process | GO:0008334 | histone mRNA metabolic process                                           | 0.0003947   | 7 |
| GO: Biological Process | GO:0071353 | cellular response to interleukin-4                                       | 0.0004977   | 7 |
| GO: Biological Process | GO:0045070 | positive regulation of viral genome replication                          | 0.0006087   | 7 |

|                        |            |                                                                                                              |            |   |
|------------------------|------------|--------------------------------------------------------------------------------------------------------------|------------|---|
| GO: Biological Process | GO:0035196 | production of miRNAs involved in gene silencing by miRNA                                                     | 0.000759   | 7 |
| GO: Biological Process | GO:0031050 | dsRNA fragmentation                                                                                          | 0.0008984  | 7 |
| GO: Biological Process | GO:0070918 | production of small RNA involved in gene silencing by RNA                                                    | 0.0008984  | 7 |
| GO: Biological Process | GO:0070670 | response to interleukin-4                                                                                    | 0.001305   | 7 |
| GO: Biological Process | GO:0050685 | positive regulation of mRNA processing                                                                       | 0.00219    | 7 |
| GO: Biological Process | GO:1903146 | regulation of autophagy of mitochondrion                                                                     | 0.006717   | 7 |
| GO: Biological Process | GO:0061077 | chaperone-mediated protein folding                                                                           | 0.01428    | 7 |
| GO: Biological Process | GO:2001244 | positive regulation of intrinsic apoptotic signaling pathway                                                 | 0.02984    | 7 |
| GO: Biological Process | GO:0006977 | DNA damage response, signal transduction by p53 class mediator resulting in cell cycle arrest                | 0.03172    | 7 |
| GO: Biological Process | GO:1902400 | intracellular signal transduction involved in G1 DNA damage checkpoint                                       | 0.03416    | 7 |
| GO: Biological Process | GO:0072431 | signal transduction involved in mitotic G1 DNA damage checkpoint                                             | 0.03416    | 7 |
| GO: Biological Process | GO:1902403 | signal transduction involved in mitotic DNA integrity checkpoint                                             | 0.03618    | 7 |
| GO: Biological Process | GO:0072413 | signal transduction involved in mitotic cell cycle checkpoint                                                | 0.03618    | 7 |
| GO: Biological Process | GO:0006611 | protein export from nucleus                                                                                  | 0.03618    | 7 |
| GO: Biological Process | GO:1902402 | signal transduction involved in mitotic DNA damage checkpoint                                                | 0.03618    | 7 |
| GO: Biological Process | GO:0009201 | ribonucleoside triphosphate biosynthetic process                                                             | 0.03897    | 7 |
| GO: Biological Process | GO:0043462 | regulation of ATPase activity                                                                                | 0.04152    | 7 |
| GO: Biological Process | GO:1901983 | regulation of protein acetylation                                                                            | 0.04754    | 7 |
| GO: Biological Process | GO:1903845 | negative regulation of cellular response to transforming growth factor beta stimulus                         | 0.0495     | 7 |
| GO: Biological Process | GO:0030512 | negative regulation of transforming growth factor beta receptor signaling pathway                            | 0.0495     | 7 |
| GO: Biological Process | GO:0009113 | purine nucleobase biosynthetic process                                                                       | 0.00001871 | 6 |
| GO: Biological Process | GO:0070935 | 3'-UTR-mediated mRNA stabilization                                                                           | 0.00005361 | 6 |
| GO: Biological Process | GO:0048026 | positive regulation of mRNA splicing, via spliceosome                                                        | 0.000266   | 6 |
| GO: Biological Process | GO:0006144 | purine nucleobase metabolic process                                                                          | 0.0008577  | 6 |
| GO: Biological Process | GO:0000470 | maturation of LSU-rRNA                                                                                       | 0.0008577  | 6 |
| GO: Biological Process | GO:0032205 | negative regulation of telomere maintenance                                                                  | 0.002118   | 6 |
| GO: Biological Process | GO:1903205 | regulation of hydrogen peroxide-induced cell death                                                           | 0.002597   | 6 |
| GO: Biological Process | GO:0036474 | cell death in response to hydrogen peroxide                                                                  | 0.003858   | 6 |
| GO: Biological Process | GO:1900740 | positive regulation of protein insertion into mitochondrial membrane involved in apoptotic signaling pathway | 0.004567   | 6 |



|                        |            |                                                                                                              |           |   |
|------------------------|------------|--------------------------------------------------------------------------------------------------------------|-----------|---|
| GO: Biological Process | GO:1902175 | regulation of oxidative stress-induced intrinsic apoptotic signaling pathway                                 | 0.004567  | 6 |
| GO: Biological Process | GO:1900739 | regulation of protein insertion into mitochondrial membrane involved in apoptotic signaling pathway          | 0.004567  | 6 |
| GO: Biological Process | GO:0001844 | protein insertion into mitochondrial membrane involved in apoptotic signaling pathway                        | 0.006183  | 6 |
| GO: Biological Process | GO:0051204 | protein insertion into mitochondrial membrane                                                                | 0.007207  | 6 |
| GO: Biological Process | GO:1901030 | positive regulation of mitochondrial outer membrane permeabilization involved in apoptotic signaling pathway | 0.01253   | 6 |
| GO: Biological Process | GO:1903202 | negative regulation of oxidative stress-induced cell death                                                   | 0.01387   | 6 |
| GO: Biological Process | GO:1902883 | negative regulation of response to oxidative stress                                                          | 0.01927   | 6 |
| GO: Biological Process | GO:1900408 | negative regulation of cellular response to oxidative stress                                                 | 0.01927   | 6 |
| GO: Biological Process | GO:1901031 | regulation of response to reactive oxygen species                                                            | 0.02375   | 6 |
| GO: Biological Process | GO:0051972 | regulation of telomerase activity                                                                            | 0.02375   | 6 |
| GO: Biological Process | GO:0032781 | positive regulation of ATPase activity                                                                       | 0.02596   | 6 |
| GO: Biological Process | GO:1901028 | regulation of mitochondrial outer membrane permeabilization involved in apoptotic signaling pathway          | 0.02825   | 6 |
| GO: Biological Process | GO:0008631 | intrinsic apoptotic signaling pathway in response to oxidative stress                                        | 0.03585   | 6 |
| GO: Biological Process | GO:0043330 | response to exogenous dsRNA                                                                                  | 0.03585   | 6 |
| GO: Biological Process | GO:0051205 | protein insertion into membrane                                                                              | 0.03585   | 6 |
| GO: Biological Process | GO:0045071 | negative regulation of viral genome replication                                                              | 0.04876   | 6 |
| GO: Biological Process | GO:0006188 | IMP biosynthetic process                                                                                     | 0.000256  | 5 |
| GO: Biological Process | GO:0071428 | rRNA-containing ribonucleoprotein complex export from nucleus                                                | 0.0004022 | 5 |
| GO: Biological Process | GO:0031125 | rRNA 3'-end processing                                                                                       | 0.0006087 | 5 |
| GO: Biological Process | GO:0007183 | SMAD protein complex assembly                                                                                | 0.0008858 | 5 |
| GO: Biological Process | GO:0046040 | IMP metabolic process                                                                                        | 0.0008858 | 5 |
| GO: Biological Process | GO:0071025 | RNA surveillance                                                                                             | 0.0008858 | 5 |
| GO: Biological Process | GO:0002190 | cap-independent translational initiation                                                                     | 0.001232  | 5 |
| GO: Biological Process | GO:0002183 | cytoplasmic translational initiation                                                                         | 0.002259  | 5 |
| GO: Biological Process | GO:0000466 | maturation of 5.8S rRNA from tricistronic rRNA transcript (SSU-rRNA, 5.8S rRNA, LSU-rRNA)                    | 0.005949  | 5 |
| GO: Biological Process | GO:1903206 | negative regulation of hydrogen peroxide-induced cell death                                                  | 0.005949  | 5 |
| GO: Biological Process | GO:1901032 | negative regulation of response to reactive oxygen species                                                   | 0.008695  | 5 |
| GO: Biological Process | GO:0061014 | positive regulation of mRNA catabolic process                                                                | 0.008695  | 5 |
| GO: Biological Process | GO:0043628 | ncRNA 3'-end processing                                                                                      | 0.008695  | 5 |

|                        |            |                                                                      |           |   |
|------------------------|------------|----------------------------------------------------------------------|-----------|---|
| GO: Biological Process | GO:0002227 | innate immune response in mucosa                                     | 0.01049   | 5 |
| GO: Biological Process | GO:0034661 | ncRNA catabolic process                                              | 0.01253   | 5 |
| GO: Biological Process | GO:0006541 | glutamine metabolic process                                          | 0.01253   | 5 |
| GO: Biological Process | GO:0061013 | regulation of mRNA catabolic process                                 | 0.01429   | 5 |
| GO: Biological Process | GO:0051973 | positive regulation of telomerase activity                           | 0.01908   | 5 |
| GO: Biological Process | GO:0009651 | response to salt stress                                              | 0.01908   | 5 |
| GO: Biological Process | GO:0006221 | pyrimidine nucleotide biosynthetic process                           | 0.02749   | 5 |
| GO: Biological Process | GO:0002832 | negative regulation of response to biotic stimulus                   | 0.03385   | 5 |
| GO: Biological Process | GO:0000002 | mitochondrial genome maintenance                                     | 0.04111   | 5 |
| GO: Biological Process | GO:0002385 | mucosal immune response                                              | 0.04557   | 5 |
| GO: Biological Process | GO:0006296 | nucleotide-excision repair, DNA incision, 5'-to lesion               | 0.0488    | 5 |
| GO: Biological Process | GO:0046825 | regulation of protein export from nucleus                            | 0.0488    | 5 |
| GO: Biological Process | GO:0070934 | CRD-mediated mRNA stabilization                                      | 0.0001075 | 4 |
| GO: Biological Process | GO:0006189 | 'de novo' IMP biosynthetic process                                   | 0.0002908 | 4 |
| GO: Biological Process | GO:1903608 | protein localization to cytoplasmic stress granule                   | 0.0006087 | 4 |
| GO: Biological Process | GO:0051029 | rRNA transport                                                       | 0.0006087 | 4 |
| GO: Biological Process | GO:0071027 | nuclear RNA surveillance                                             | 0.00585   | 4 |
| GO: Biological Process | GO:0071028 | nuclear mRNA surveillance                                            | 0.00585   | 4 |
| GO: Biological Process | GO:0002192 | IRES-dependent translational initiation of linear mRNA               | 0.00585   | 4 |
| GO: Biological Process | GO:0000244 | spliceosomal tri-snRNP complex assembly                              | 0.007801  | 4 |
| GO: Biological Process | GO:1903203 | regulation of oxidative stress-induced neuron death                  | 0.01019   | 4 |
| GO: Biological Process | GO:0031054 | pre-miRNA processing                                                 | 0.01019   | 4 |
| GO: Biological Process | GO:0036475 | neuron death in response to oxidative stress                         | 0.01301   | 4 |
| GO: Biological Process | GO:0051131 | chaperone-mediated protein complex assembly                          | 0.01301   | 4 |
| GO: Biological Process | GO:0045793 | positive regulation of cell size                                     | 0.01927   | 4 |
| GO: Biological Process | GO:1904357 | negative regulation of telomere maintenance via telomere lengthening | 0.01927   | 4 |
| GO: Biological Process | GO:0042776 | mitochondrial ATP synthesis coupled proton transport                 | 0.01927   | 4 |
| GO: Biological Process | GO:0051084 | 'de novo' posttranslational protein folding                          | 0.02354   | 4 |
| GO: Biological Process | GO:0016075 | rRNA catabolic process                                               | 0.02354   | 4 |
| GO: Biological Process | GO:0042276 | error-prone translesion synthesis                                    | 0.02728   | 4 |

|                        |            |                                                                                                                                                     |          |   |
|------------------------|------------|-----------------------------------------------------------------------------------------------------------------------------------------------------|----------|---|
| GO: Biological Process | GO:0043153 | entrainment of circadian clock by photoperiod                                                                                                       | 0.02728  | 4 |
| GO: Biological Process | GO:0050687 | negative regulation of defense response to virus                                                                                                    | 0.02728  | 4 |
| GO: Biological Process | GO:0070987 | error-free translesion synthesis                                                                                                                    | 0.02728  | 4 |
| GO: Biological Process | GO:1902176 | negative regulation of oxidative stress-induced intrinsic apoptotic signaling pathway                                                               | 0.036    | 4 |
| GO: Biological Process | GO:0010661 | positive regulation of muscle cell apoptotic process                                                                                                | 0.036    | 4 |
| GO: Biological Process | GO:0033145 | positive regulation of intracellular steroid hormone receptor signaling pathway                                                                     | 0.036    | 4 |
| GO: Biological Process | GO:0006458 | 'de novo' protein folding                                                                                                                           | 0.0412   | 4 |
| GO: Biological Process | GO:1903427 | negative regulation of reactive oxygen species biosynthetic process                                                                                 | 0.04721  | 4 |
| GO: Biological Process | GO:0046653 | tetrahydrofolate metabolic process                                                                                                                  | 0.04721  | 4 |
| GO: Biological Process | GO:0006407 | rRNA export from nucleus                                                                                                                            | 0.00205  | 3 |
| GO: Biological Process | GO:0090666 | scaRNA localization to Cajal body                                                                                                                   | 0.00205  | 3 |
| GO: Biological Process | GO:1903751 | negative regulation of intrinsic apoptotic signaling pathway in response to hydrogen peroxide                                                       | 0.00205  | 3 |
| GO: Biological Process | GO:1903750 | regulation of intrinsic apoptotic signaling pathway in response to hydrogen peroxide                                                                | 0.00205  | 3 |
| GO: Biological Process | GO:0006177 | GMP biosynthetic process                                                                                                                            | 0.004567 | 3 |
| GO: Biological Process | GO:2000767 | positive regulation of cytoplasmic translation                                                                                                      | 0.004567 | 3 |
| GO: Biological Process | GO:0006432 | phenylalanyl-tRNA aminoacylation                                                                                                                    | 0.004567 | 3 |
| GO: Biological Process | GO:0042791 | 5S class rRNA transcription by RNA polymerase III                                                                                                   | 0.00806  | 3 |
| GO: Biological Process | GO:0036481 | intrinsic apoptotic signaling pathway in response to hydrogen peroxide                                                                              | 0.00806  | 3 |
| GO: Biological Process | GO:0042797 | tRNA transcription by RNA polymerase III                                                                                                            | 0.00806  | 3 |
| GO: Biological Process | GO:0075522 | IRES-dependent viral translational initiation                                                                                                       | 0.01291  | 3 |
| GO: Biological Process | GO:0009304 | tRNA transcription                                                                                                                                  | 0.01291  | 3 |
| GO: Biological Process | GO:0016584 | nucleosome positioning                                                                                                                              | 0.01823  | 3 |
| GO: Biological Process | GO:0034475 | U4 snRNA 3'-end processing                                                                                                                          | 0.01823  | 3 |
| GO: Biological Process | GO:1903376 | regulation of oxidative stress-induced neuron intrinsic apoptotic signaling pathway                                                                 | 0.01823  | 3 |
| GO: Biological Process | GO:0032070 | regulation of deoxyribonuclease activity                                                                                                            | 0.01823  | 3 |
| GO: Biological Process | GO:0000447 | endonucleolytic cleavage in ITS1 to separate SSU-rRNA from 5.8S rRNA and LSU-rRNA from tricistronic rRNA transcript (SSU-rRNA, 5.8S rRNA, LSU-rRNA) | 0.01823  | 3 |
| GO: Biological Process | GO:0046826 | negative regulation of protein export from nucleus                                                                                                  | 0.01823  | 3 |
| GO: Biological Process | GO:0075713 | establishment of integrated proviral latency                                                                                                        | 0.01823  | 3 |
| GO: Biological Process | GO:0036480 | neuron intrinsic apoptotic signaling pathway in response to oxidative stress                                                                        | 0.01823  | 3 |

|                        |            |                                                                                                     |         |   |
|------------------------|------------|-----------------------------------------------------------------------------------------------------|---------|---|
| GO: Biological Process | GO:1901299 | negative regulation of hydrogen peroxide-mediated programmed cell death                             | 0.01823 | 3 |
| GO: Biological Process | GO:0033750 | ribosome localization                                                                               | 0.02475 | 3 |
| GO: Biological Process | GO:0031053 | primary miRNA processing                                                                            | 0.02475 | 3 |
| GO: Biological Process | GO:0034427 | nuclear-transcribed mRNA catabolic process, exonucleolytic, 3'-5'                                   | 0.02475 | 3 |
| GO: Biological Process | GO:0009048 | dosage compensation by inactivation of X chromosome                                                 | 0.02475 | 3 |
| GO: Biological Process | GO:0000054 | ribosomal subunit export from nucleus                                                               | 0.02475 | 3 |
| GO: Biological Process | GO:0034063 | stress granule assembly                                                                             | 0.03139 | 3 |
| GO: Biological Process | GO:0019081 | viral translation                                                                                   | 0.03139 | 3 |
| GO: Biological Process | GO:0019043 | establishment of viral latency                                                                      | 0.03139 | 3 |
| GO: Biological Process | GO:0034472 | snRNA 3'-end processing                                                                             | 0.03139 | 3 |
| GO: Biological Process | GO:0000463 | maturation of LSU-rRNA from tricistronic rRNA transcript (SSU-rRNA, 5.8S rRNA, LSU-rRNA)            | 0.03139 | 3 |
| GO: Biological Process | GO:1903204 | negative regulation of oxidative stress-induced neuron death                                        | 0.03139 | 3 |
| GO: Biological Process | GO:0071474 | cellular hyperosmotic response                                                                      | 0.03139 | 3 |
| GO: Biological Process | GO:0061684 | chaperone-mediated autophagy                                                                        | 0.03139 | 3 |
| GO: Biological Process | GO:0042473 | outer ear morphogenesis                                                                             | 0.03139 | 3 |
| GO: Biological Process | GO:0008298 | intracellular mRNA localization                                                                     | 0.03897 | 3 |
| GO: Biological Process | GO:0010826 | negative regulation of centrosome duplication                                                       | 0.03897 | 3 |
| GO: Biological Process | GO:0046606 | negative regulation of centrosome cycle                                                             | 0.03897 | 3 |
| GO: Biological Process | GO:0019042 | viral latency                                                                                       | 0.03897 | 3 |
| GO: Biological Process | GO:0045472 | response to ether                                                                                   | 0.03897 | 3 |
| GO: Biological Process | GO:0007549 | dosage compensation                                                                                 | 0.03897 | 3 |
| GO: Biological Process | GO:0032211 | negative regulation of telomere maintenance via telomerase                                          | 0.04825 | 3 |
| GO: Biological Process | GO:1901298 | regulation of hydrogen peroxide-mediated programmed cell death                                      | 0.04825 | 3 |
| GO: Biological Process | GO:0033148 | positive regulation of intracellular estrogen receptor signaling pathway                            | 0.04825 | 3 |
| GO: Biological Process | GO:0051085 | chaperone cofactor-dependent protein refolding                                                      | 0.04825 | 3 |
| GO: Biological Process | GO:1901355 | response to rapamycin                                                                               | 0.01324 | 2 |
| GO: Biological Process | GO:0000461 | endonucleolytic cleavage to generate mature 3'-end of SSU-rRNA from (SSU-rRNA, 5.8S rRNA, LSU-rRNA) | 0.01324 | 2 |
| GO: Biological Process | GO:0003365 | establishment of cell polarity involved in ameboidal cell migration                                 | 0.01324 | 2 |
| GO: Biological Process | GO:0071475 | cellular hyperosmotic salinity response                                                             | 0.02984 | 2 |

|                           |            |                                                                                      |            |     |
|---------------------------|------------|--------------------------------------------------------------------------------------|------------|-----|
| GO: Biological Process    | GO:0009177 | pyrimidine deoxyribonucleoside monophosphate biosynthetic process                    | 0.02984    | 2   |
| GO: Biological Process    | GO:0090367 | negative regulation of mRNA modification                                             | 0.02984    | 2   |
| GO: Biological Process    | GO:0044413 | avoidance of host defenses                                                           | 0.02984    | 2   |
| GO: Biological Process    | GO:0014076 | response to fluoxetine                                                               | 0.02984    | 2   |
| GO: Biological Process    | GO:0051834 | evasion or tolerance of defenses of other organism involved in symbiotic interaction | 0.02984    | 2   |
| GO: Biological Process    | GO:0019049 | evasion or tolerance of host defenses by virus                                       | 0.02984    | 2   |
| GO: Biological Process    | GO:0006433 | prolyl-tRNA aminoacylation                                                           | 0.02984    | 2   |
| GO: Biological Process    | GO:0044415 | evasion or tolerance of host defenses                                                | 0.02984    | 2   |
| GO: Biological Process    | GO:0051832 | avoidance of defenses of other organism involved in symbiotic interaction            | 0.02984    | 2   |
| GO: Biological Process    | GO:0090170 | regulation of Golgi inheritance                                                      | 0.0488     | 2   |
| GO: Biological Process    | GO:0006015 | 5-phosphoribose 1-diphosphate biosynthetic process                                   | 0.0488     | 2   |
| GO: Biological Process    | GO:0046391 | 5-phosphoribose 1-diphosphate metabolic process                                      | 0.0488     | 2   |
| GO: Biological Process    | GO:0070966 | nuclear-transcribed mRNA catabolic process, no-go decay                              | 0.0488     | 2   |
| GO: Biological Process    | GO:0032077 | positive regulation of deoxyribonuclease activity                                    | 0.0488     | 2   |
| GO: Biological Process    | GO:0046083 | adenine metabolic process                                                            | 0.0488     | 2   |
| GO: Biological Process    | GO:0090365 | regulation of mRNA modification                                                      | 0.0488     | 2   |
| GO: Biological Process    | GO:0046084 | adenine biosynthetic process                                                         | 0.0488     | 2   |
| GO: Biological Process    | GO:0009176 | pyrimidine deoxyribonucleoside monophosphate metabolic process                       | 0.0488     | 2   |
| GO: Biological Process    | GO:0097167 | circadian regulation of translation                                                  | 0.0488     | 2   |
| <b>Cellular Component</b> |            |                                                                                      |            |     |
| GO: Cellular Component    | GO:1990904 | ribonucleoprotein complex                                                            | 4.289E-161 | 221 |
| GO: Cellular Component    | GO:0005730 | nucleolus                                                                            | 4.492E-48  | 127 |
| GO: Cellular Component    | GO:0005840 | ribosome                                                                             | 1.604E-118 | 121 |
| GO: Cellular Component    | GO:0044391 | ribosomal subunit                                                                    | 1.087E-120 | 110 |
| GO: Cellular Component    | GO:0005739 | mitochondrion                                                                        | 3.032E-10  | 106 |
| GO: Cellular Component    | GO:0044445 | cytosolic part                                                                       | 2.792E-82  | 97  |
| GO: Cellular Component    | GO:0022626 | cytosolic ribosome                                                                   | 4E-100     | 85  |
| GO: Cellular Component    | GO:0030054 | cell junction                                                                        | 6.882E-11  | 83  |
| GO: Cellular Component    | GO:0044430 | cytoskeletal part                                                                    | 0.0004784  | 74  |
| GO: Cellular Component    | GO:0031975 | envelope                                                                             | 2.474E-07  | 72  |

|                        |            |                                   |           |    |
|------------------------|------------|-----------------------------------|-----------|----|
| GO: Cellular Component | GO:0031967 | organelle envelope                | 4.238E-07 | 71 |
| GO: Cellular Component | GO:0005694 | chromosome                        | 2.444E-09 | 67 |
| GO: Cellular Component | GO:0044427 | chromosomal part                  | 5.968E-11 | 66 |
| GO: Cellular Component | GO:0044429 | mitochondrial part                | 3.964E-08 | 66 |
| GO: Cellular Component | GO:0070161 | anchoring junction                | 2.503E-21 | 65 |
| GO: Cellular Component | GO:0005912 | adherens junction                 | 1.771E-21 | 64 |
| GO: Cellular Component | GO:0005925 | focal adhesion                    | 1.161E-25 | 63 |
| GO: Cellular Component | GO:0005924 | cell-substrate adherens junction  | 2.199E-25 | 63 |
| GO: Cellular Component | GO:0030055 | cell-substrate junction           | 4.147E-25 | 63 |
| GO: Cellular Component | GO:0015934 | large ribosomal subunit           | 4.093E-61 | 60 |
| GO: Cellular Component | GO:0015630 | microtubule cytoskeleton          | 0.0003956 | 59 |
| GO: Cellular Component | GO:0044451 | nucleoplasm part                  | 8.527E-10 | 58 |
| GO: Cellular Component | GO:0043005 | neuron projection                 | 0.01045   | 55 |
| GO: Cellular Component | GO:0019866 | organelle inner membrane          | 1.253E-11 | 53 |
| GO: Cellular Component | GO:0005740 | mitochondrial envelope            | 1.358E-07 | 53 |
| GO: Cellular Component | GO:0015935 | small ribosomal subunit           | 5.203E-61 | 52 |
| GO: Cellular Component | GO:0031966 | mitochondrial membrane            | 5.08E-08  | 52 |
| GO: Cellular Component | GO:1902494 | catalytic complex                 | 0.008851  | 51 |
| GO: Cellular Component | GO:0022625 | cytosolic large ribosomal subunit | 6.66E-60  | 50 |
| GO: Cellular Component | GO:0005759 | mitochondrial matrix              | 2.128E-13 | 48 |
| GO: Cellular Component | GO:0005743 | mitochondrial inner membrane      | 1.145E-10 | 48 |
| GO: Cellular Component | GO:0000785 | chromatin                         | 1.043E-08 | 43 |
| GO: Cellular Component | GO:0000228 | nuclear chromosome                | 7.835E-07 | 43 |
| GO: Cellular Component | GO:0099513 | polymeric cytoskeletal fiber      | 0.0002007 | 43 |
| GO: Cellular Component | GO:0099512 | supramolecular fiber              | 0.0002562 | 43 |
| GO: Cellular Component | GO:0016604 | nuclear body                      | 4.516E-12 | 42 |
| GO: Cellular Component | GO:0044454 | nuclear chromosome part           | 3.365E-07 | 42 |
| GO: Cellular Component | GO:0005681 | spliceosomal complex              | 3.327E-22 | 40 |
| GO: Cellular Component | GO:0036477 | somatodendritic compartment       | 0.03335   | 40 |
| GO: Cellular Component | GO:0035770 | ribonucleoprotein granule         | 2.126E-21 | 37 |

|                        |            |                                         |            |    |
|------------------------|------------|-----------------------------------------|------------|----|
| GO: Cellular Component | GO:0044297 | cell body                               | 0.005395   | 37 |
| GO: Cellular Component | GO:0048471 | perinuclear region of cytoplasm         | 0.01045    | 37 |
| GO: Cellular Component | GO:0022627 | cytosolic small ribosomal subunit       | 1.375E-45  | 36 |
| GO: Cellular Component | GO:1990234 | transferase complex                     | 0.04191    | 34 |
| GO: Cellular Component | GO:0036464 | cytoplasmic ribonucleoprotein granule   | 2.841E-17  | 32 |
| GO: Cellular Component | GO:0005874 | microtubule                             | 0.00003644 | 32 |
| GO: Cellular Component | GO:0016607 | nuclear speck                           | 3.461E-12  | 31 |
| GO: Cellular Component | GO:0043209 | myelin sheath                           | 3.825E-12  | 31 |
| GO: Cellular Component | GO:0030425 | dendrite                                | 0.01483    | 31 |
| GO: Cellular Component | GO:0000790 | nuclear chromatin                       | 0.00003171 | 27 |
| GO: Cellular Component | GO:0000313 | organellar ribosome                     | 1.216E-18  | 26 |
| GO: Cellular Component | GO:0005761 | mitochondrial ribosome                  | 1.216E-18  | 26 |
| GO: Cellular Component | GO:0071013 | catalytic step 2 spliceosome            | 4.477E-17  | 26 |
| GO: Cellular Component | GO:0098687 | chromosomal region                      | 0.0002329  | 26 |
| GO: Cellular Component | GO:0005667 | transcription factor complex            | 0.006731   | 23 |
| GO: Cellular Component | GO:0032993 | protein-DNA complex                     | 0.00001086 | 20 |
| GO: Cellular Component | GO:0034399 | nuclear periphery                       | 4.238E-07  | 19 |
| GO: Cellular Component | GO:0016363 | nuclear matrix                          | 2.856E-07  | 17 |
| GO: Cellular Component | GO:0000781 | chromosome, telomeric region            | 0.0001044  | 17 |
| GO: Cellular Component | GO:0005763 | mitochondrial small ribosomal subunit   | 1.361E-14  | 15 |
| GO: Cellular Component | GO:0000314 | organellar small ribosomal subunit      | 1.361E-14  | 15 |
| GO: Cellular Component | GO:0010494 | cytoplasmic stress granule              | 5.229E-13  | 15 |
| GO: Cellular Component | GO:0005844 | polysome                                | 2.125E-10  | 15 |
| GO: Cellular Component | GO:0097525 | spliceosomal snRNP complex              | 9.052E-10  | 15 |
| GO: Cellular Component | GO:0030532 | small nuclear ribonucleoprotein complex | 5.599E-09  | 15 |
| GO: Cellular Component | GO:0000784 | nuclear chromosome, telomeric region    | 0.0001394  | 15 |
| GO: Cellular Component | GO:0034708 | methyltransferase complex               | 0.00004648 | 13 |
| GO: Cellular Component | GO:0000786 | nucleosome                              | 0.0007171  | 12 |
| GO: Cellular Component | GO:0044815 | DNA packaging complex                   | 0.001172   | 12 |
| GO: Cellular Component | GO:0042470 | melanosome                              | 0.002681   | 11 |

|                        |            |                                       |             |    |
|------------------------|------------|---------------------------------------|-------------|----|
| GO: Cellular Component | GO:0048770 | pigment granule                       | 0.002681    | 11 |
| GO: Cellular Component | GO:0044798 | nuclear transcription factor complex  | 0.01483     | 11 |
| GO: Cellular Component | GO:0005685 | U1 snRNP                              | 2.174E-10   | 10 |
| GO: Cellular Component | GO:0005689 | U12-type spliceosomal complex         | 3.673E-08   | 10 |
| GO: Cellular Component | GO:0005684 | U2-type spliceosomal complex          | 2.445E-07   | 10 |
| GO: Cellular Component | GO:0030684 | preribosome                           | 0.0004332   | 10 |
| GO: Cellular Component | GO:0005762 | mitochondrial large ribosomal subunit | 0.000014    | 9  |
| GO: Cellular Component | GO:0000315 | organellar large ribosomal subunit    | 0.000014    | 9  |
| GO: Cellular Component | GO:0005884 | actin filament                        | 0.0129      | 9  |
| GO: Cellular Component | GO:0030863 | cortical cytoskeleton                 | 0.01525     | 9  |
| GO: Cellular Component | GO:0005832 | chaperonin-containing T-complex       | 1.361E-10   | 8  |
| GO: Cellular Component | GO:0002199 | zona pellucida receptor complex       | 1.998E-09   | 8  |
| GO: Cellular Component | GO:0005686 | U2 snRNP                              | 0.000000521 | 8  |
| GO: Cellular Component | GO:0071011 | pre-catalytic spliceosome             | 0.000002873 | 8  |
| GO: Cellular Component | GO:0030687 | preribosome, large subunit precursor  | 0.0000058   | 8  |
| GO: Cellular Component | GO:0042645 | mitochondrial nucleoid                | 0.000551    | 8  |
| GO: Cellular Component | GO:0009295 | nucleoid                              | 0.0007376   | 8  |
| GO: Cellular Component | GO:0072686 | mitotic spindle                       | 0.004751    | 8  |
| GO: Cellular Component | GO:0044452 | nucleolar part                        | 0.007866    | 8  |
| GO: Cellular Component | GO:0035097 | histone methyltransferase complex     | 0.009817    | 8  |
| GO: Cellular Component | GO:0034719 | SMN-Sm protein complex                | 0.000004222 | 7  |
| GO: Cellular Component | GO:0071010 | prespliceosome                        | 0.00002057  | 7  |
| GO: Cellular Component | GO:0008180 | COP9 signalosome                      | 0.0005133   | 7  |
| GO: Cellular Component | GO:0000791 | euchromatin                           | 0.0014      | 7  |
| GO: Cellular Component | GO:0000932 | P-body                                | 0.02965     | 7  |
| GO: Cellular Component | GO:0042382 | paraspeckles                          | 1.318E-08   | 6  |
| GO: Cellular Component | GO:0071141 | SMAD protein complex                  | 2.856E-07   | 6  |
| GO: Cellular Component | GO:0071004 | U2-type prespliceosome                | 0.00004885  | 6  |
| GO: Cellular Component | GO:0000178 | exosome (RNase complex)               | 0.0002562   | 6  |
| GO: Cellular Component | GO:0035145 | exon-exon junction complex            | 0.0004332   | 6  |



|                        |            |                                                              |             |   |
|------------------------|------------|--------------------------------------------------------------|-------------|---|
| GO: Cellular Component | GO:0005719 | nuclear euchromatin                                          | 0.001839    | 6 |
| GO: Cellular Component | GO:0031672 | A band                                                       | 0.01044     | 6 |
| GO: Cellular Component | GO:1903293 | phosphatase complex                                          | 0.0202      | 6 |
| GO: Cellular Component | GO:0008287 | protein serine/threonine phosphatase complex                 | 0.0202      | 6 |
| GO: Cellular Component | GO:0005871 | kinesin complex                                              | 0.02975     | 6 |
| GO: Cellular Component | GO:0070937 | CRD-mediated mRNA stability complex                          | 0.000001837 | 5 |
| GO: Cellular Component | GO:0005687 | U4 snRNP                                                     | 0.00005664  | 5 |
| GO: Cellular Component | GO:0034709 | methylosome                                                  | 0.0001599   | 5 |
| GO: Cellular Component | GO:0000176 | nuclear exosome (RNase complex)                              | 0.0004945   | 5 |
| GO: Cellular Component | GO:0005697 | telomerase holoenzyme complex                                | 0.001561    | 5 |
| GO: Cellular Component | GO:0002102 | podosome                                                     | 0.006187    | 5 |
| GO: Cellular Component | GO:0097526 | spliceosomal tri-snRNP complex                               | 0.008335    | 5 |
| GO: Cellular Component | GO:0000788 | nuclear nucleosome                                           | 0.03847     | 5 |
| GO: Cellular Component | GO:0097452 | GAIT complex                                                 | 0.000009873 | 4 |
| GO: Cellular Component | GO:0034715 | pICln-Sm protein complex                                     | 0.0001156   | 4 |
| GO: Cellular Component | GO:1990124 | messenger ribonucleoprotein complex                          | 0.001172    | 4 |
| GO: Cellular Component | GO:0000177 | cytoplasmic exosome (RNase complex)                          | 0.005564    | 4 |
| GO: Cellular Component | GO:0005682 | U5 snRNP                                                     | 0.006982    | 4 |
| GO: Cellular Component | GO:0071682 | endocytic vesicle lumen                                      | 0.008531    | 4 |
| GO: Cellular Component | GO:0035327 | transcriptionally active chromatin                           | 0.01726     | 4 |
| GO: Cellular Component | GO:0005753 | mitochondrial proton-transporting ATP synthase complex       | 0.01726     | 4 |
| GO: Cellular Component | GO:0045259 | proton-transporting ATP synthase complex                     | 0.02344     | 4 |
| GO: Cellular Component | GO:0046540 | U4/U6 x U5 tri-snRNP complex                                 | 0.02344     | 4 |
| GO: Cellular Component | GO:0009328 | phenylalanine-tRNA ligase complex                            | 0.0002544   | 3 |
| GO: Cellular Component | GO:0005853 | eukaryotic translation elongation factor 1 complex           | 0.000833    | 3 |
| GO: Cellular Component | GO:0070552 | BRISC complex                                                | 0.001906    | 3 |
| GO: Cellular Component | GO:0005786 | signal recognition particle, endoplasmic reticulum targeting | 0.003434    | 3 |
| GO: Cellular Component | GO:0048500 | signal recognition particle                                  | 0.003434    | 3 |
| GO: Cellular Component | GO:0017101 | aminoacyl-tRNA synthetase multienzyme complex                | 0.003434    | 3 |
| GO: Cellular Component | GO:0000127 | transcription factor TFIIC complex                           | 0.003434    | 3 |

|                        |            |                                                                             |          |   |
|------------------------|------------|-----------------------------------------------------------------------------|----------|---|
| GO: Cellular Component | GO:0000275 | mitochondrial proton-transporting ATP synthase complex, catalytic core F(1) | 0.003434 | 3 |
| GO: Cellular Component | GO:0045261 | proton-transporting ATP synthase complex, catalytic core F(1)               | 0.003434 | 3 |
| GO: Cellular Component | GO:0072357 | PTW/PP1 phosphatase complex                                                 | 0.005564 | 3 |
| GO: Cellular Component | GO:0000243 | commitment complex                                                          | 0.005564 | 3 |
| GO: Cellular Component | GO:0005683 | U7 snRNP                                                                    | 0.005564 | 3 |
| GO: Cellular Component | GO:0090576 | RNA polymerase III transcription factor complex                             | 0.008151 | 3 |
| GO: Cellular Component | GO:0072669 | tRNA-splicing ligase complex                                                | 0.008151 | 3 |
| GO: Cellular Component | GO:0001650 | fibrillar center                                                            | 0.01118  | 3 |
| GO: Cellular Component | GO:0048188 | Set1C/COMPASS complex                                                       | 0.0194   | 3 |
| GO: Cellular Component | GO:0000782 | telomere cap complex                                                        | 0.02947  | 3 |
| GO: Cellular Component | GO:0031616 | spindle pole centrosome                                                     | 0.02947  | 3 |
| GO: Cellular Component | GO:0032797 | SMN complex                                                                 | 0.02947  | 3 |
| GO: Cellular Component | GO:0000783 | nuclear telomere cap complex                                                | 0.02947  | 3 |
| GO: Cellular Component | GO:0031011 | Ino80 complex                                                               | 0.03568  | 3 |
| GO: Cellular Component | GO:0033202 | DNA helicase complex                                                        | 0.04191  | 3 |
| GO: Cellular Component | GO:0071144 | heteromeric SMAD protein complex                                            | 0.005782 | 2 |
| GO: Cellular Component | GO:0043564 | Ku70:Ku80 complex                                                           | 0.01414  | 2 |
| GO: Cellular Component | GO:0032444 | activin responsive factor complex                                           | 0.01414  | 2 |
| GO: Cellular Component | GO:0044530 | supraspliceosomal complex                                                   | 0.01414  | 2 |
| GO: Cellular Component | GO:0097524 | sperm plasma membrane                                                       | 0.02496  | 2 |
| GO: Cellular Component | GO:0035061 | interchromatin granule                                                      | 0.02496  | 2 |
| GO: Cellular Component | GO:0035985 | senescence-associated heterochromatin focus                                 | 0.02496  | 2 |
| GO: Cellular Component | GO:0002189 | ribose phosphate diphosphokinase complex                                    | 0.02496  | 2 |
| GO: Cellular Component | GO:0001651 | dense fibrillar component                                                   | 0.03783  | 2 |
| GO: Cellular Component | GO:0045298 | tubulin complex                                                             | 0.03783  | 2 |
| GO: Cellular Component | GO:0097255 | R2TP complex                                                                | 0.03783  | 2 |

| <b>Decreased in the presence of SMURF2 (wild-type and mutant Cys716Gly form)</b> |            |                                                          |           |    |
|----------------------------------------------------------------------------------|------------|----------------------------------------------------------|-----------|----|
| <b>Molecular Functions</b>                                                       |            |                                                          |           |    |
| GO: Molecular Function                                                           | GO:0003723 | RNA binding                                              | 0.004098  | 14 |
| GO: Molecular Function                                                           | GO:0042802 | identical protein binding                                | 0.0182    | 11 |
| GO: Molecular Function                                                           | GO:0016491 | oxidoreductase activity                                  | 0.04969   | 7  |
| GO: Molecular Function                                                           | GO:0042623 | ATPase activity, coupled                                 | 0.0382    | 5  |
| GO: Molecular Function                                                           | GO:0000146 | microfilament motor activity                             | 0.0001103 | 4  |
| GO: Molecular Function                                                           | GO:0051015 | actin filament binding                                   | 0.0122    | 4  |
| GO: Molecular Function                                                           | GO:0003774 | motor activity                                           | 0.0122    | 4  |
| GO: Molecular Function                                                           | GO:0005516 | calmodulin binding                                       | 0.03655   | 4  |
| GO: Molecular Function                                                           | GO:0030898 | actin-dependent ATPase activity                          | 0.0007356 | 3  |
| GO: Molecular Function                                                           | GO:0034987 | immunoglobulin receptor binding                          | 0.004098  | 3  |
| GO: Molecular Function                                                           | GO:0043531 | ADP binding                                              | 0.006509  | 3  |
| GO: Molecular Function                                                           | GO:0051087 | chaperone binding                                        | 0.03343   | 3  |
| GO: Molecular Function                                                           | GO:0003697 | single-stranded DNA binding                              | 0.04268   | 3  |
| GO: Molecular Function                                                           | GO:0004738 | pyruvate dehydrogenase activity                          | 0.006189  | 2  |
| GO: Molecular Function                                                           | GO:0034604 | pyruvate dehydrogenase (NAD+) activity                   | 0.006189  | 2  |
| GO: Molecular Function                                                           | GO:0034603 | pyruvate dehydrogenase [NAD(P)+] activity                | 0.006189  | 2  |
| GO: Molecular Function                                                           | GO:0015130 | mevalonate transmembrane transporter activity            | 0.04268   | 1  |
| GO: Molecular Function                                                           | GO:0004148 | dihydrolipoyl dehydrogenase activity                     | 0.04268   | 1  |
| GO: Molecular Function                                                           | GO:0043544 | lipoamide binding                                        | 0.04268   | 1  |
| GO: Molecular Function                                                           | GO:0004149 | dihydrolipoyllysine-residue succinyltransferase activity | 0.04268   | 1  |
| <b>Biological processes</b>                                                      |            |                                                          |           |    |
| GO: Biological Process                                                           | GO:0044248 | cellular catabolic process                               | 0.02007   | 14 |
| GO: Biological Process                                                           | GO:1901575 | organic substance catabolic process                      | 0.04769   | 13 |
| GO: Biological Process                                                           | GO:0006508 | proteolysis                                              | 0.04923   | 12 |
| GO: Biological Process                                                           | GO:0006897 | endocytosis                                              | 0.0124    | 9  |
| GO: Biological Process                                                           | GO:0055114 | oxidation-reduction process                              | 0.04667   | 9  |

|                        |            |                                                                         |          |   |
|------------------------|------------|-------------------------------------------------------------------------|----------|---|
| GO: Biological Process | GO:0006091 | generation of precursor metabolites and energy                          | 0.01262  | 7 |
| GO: Biological Process | GO:0030048 | actin filament-based movement                                           | 0.001584 | 6 |
| GO: Biological Process | GO:0006909 | phagocytosis                                                            | 0.0124   | 6 |
| GO: Biological Process | GO:0015980 | energy derivation by oxidation of organic compounds                     | 0.01262  | 6 |
| GO: Biological Process | GO:0045333 | cellular respiration                                                    | 0.01262  | 5 |
| GO: Biological Process | GO:0006898 | receptor-mediated endocytosis                                           | 0.04923  | 5 |
| GO: Biological Process | GO:0006958 | complement activation, classical pathway                                | 0.0124   | 4 |
| GO: Biological Process | GO:0009060 | aerobic respiration                                                     | 0.0124   | 4 |
| GO: Biological Process | GO:0002455 | humoral immune response mediated by circulating immunoglobulin          | 0.0124   | 4 |
| GO: Biological Process | GO:0006956 | complement activation                                                   | 0.01262  | 4 |
| GO: Biological Process | GO:0072376 | protein activation cascade                                              | 0.02007  | 4 |
| GO: Biological Process | GO:0016064 | immunoglobulin mediated immune response                                 | 0.03264  | 4 |
| GO: Biological Process | GO:0019724 | B cell mediated immunity                                                | 0.0331   | 4 |
| GO: Biological Process | GO:0008360 | regulation of cell shape                                                | 0.0331   | 4 |
| GO: Biological Process | GO:0031032 | actomyosin structure organization                                       | 0.03963  | 4 |
| GO: Biological Process | GO:0046487 | glyoxylate metabolic process                                            | 0.0124   | 3 |
| GO: Biological Process | GO:0006099 | tricarboxylic acid cycle                                                | 0.0124   | 3 |
| GO: Biological Process | GO:0006101 | citrate metabolic process                                               | 0.01262  | 3 |
| GO: Biological Process | GO:0006084 | acetyl-CoA metabolic process                                            | 0.01262  | 3 |
| GO: Biological Process | GO:0072350 | tricarboxylic acid metabolic process                                    | 0.0144   | 3 |
| GO: Biological Process | GO:0006911 | phagocytosis, engulfment                                                | 0.03121  | 3 |
| GO: Biological Process | GO:0016441 | posttranscriptional gene silencing                                      | 0.03136  | 3 |
| GO: Biological Process | GO:0035194 | posttranscriptional gene silencing by RNA                               | 0.03136  | 3 |
| GO: Biological Process | GO:0010324 | membrane invagination                                                   | 0.0331   | 3 |
| GO: Biological Process | GO:0061732 | mitochondrial acetyl-CoA biosynthetic process from pyruvate             | 0.0144   | 2 |
| GO: Biological Process | GO:0060211 | regulation of nuclear-transcribed mRNA poly(A) tail shortening          | 0.02996  | 2 |
| GO: Biological Process | GO:0060213 | positive regulation of nuclear-transcribed mRNA poly(A) tail shortening | 0.02996  | 2 |
| GO: Biological Process | GO:0010510 | regulation of acetyl-CoA biosynthetic process from pyruvate             | 0.03121  | 2 |
| GO: Biological Process | GO:0006554 | lysine catabolic process                                                | 0.03121  | 2 |
| GO: Biological Process | GO:0050812 | regulation of acyl-CoA biosynthetic process                             | 0.03136  | 2 |

|                           |            |                                                                                                  |            |    |
|---------------------------|------------|--------------------------------------------------------------------------------------------------|------------|----|
| GO: Biological Process    | GO:0006553 | lysine metabolic process                                                                         | 0.03136    | 2  |
| GO: Biological Process    | GO:0006086 | acetyl-CoA biosynthetic process from pyruvate                                                    | 0.0331     | 2  |
| GO: Biological Process    | GO:1900151 | regulation of nuclear-transcribed mRNA catabolic process, deadenylation-dependent decay          | 0.0331     | 2  |
| GO: Biological Process    | GO:1900153 | positive regulation of nuclear-transcribed mRNA catabolic process, deadenylation-dependent decay | 0.0331     | 2  |
| GO: Biological Process    | GO:0033197 | response to vitamin E                                                                            | 0.0331     | 2  |
| GO: Biological Process    | GO:0031442 | positive regulation of mRNA 3'-end processing                                                    | 0.03963    | 2  |
| GO: Biological Process    | GO:0006085 | acetyl-CoA biosynthetic process                                                                  | 0.04667    | 2  |
| GO: Biological Process    | GO:0009068 | aspartate family amino acid catabolic process                                                    | 0.04667    | 2  |
| GO: Biological Process    | GO:0070584 | mitochondrion morphogenesis                                                                      | 0.04852    | 2  |
| GO: Biological Process    | GO:0006103 | 2-oxoglutarate metabolic process                                                                 | 0.04923    | 2  |
| GO: Biological Process    | GO:0042762 | regulation of sulfur metabolic process                                                           | 0.04923    | 2  |
| <b>Cellular Component</b> |            |                                                                                                  |            |    |
| GO: Cellular Component    | GO:0005739 | mitochondrion                                                                                    | 0.0221     | 12 |
| GO: Cellular Component    | GO:0044430 | cytoskeletal part                                                                                | 0.04738    | 10 |
| GO: Cellular Component    | GO:0044429 | mitochondrial part                                                                               | 0.0406     | 8  |
| GO: Cellular Component    | GO:1902494 | catalytic complex                                                                                | 0.04878    | 8  |
| GO: Cellular Component    | GO:0015629 | actin cytoskeleton                                                                               | 0.02023    | 6  |
| GO: Cellular Component    | GO:0070161 | anchoring junction                                                                               | 0.02389    | 6  |
| GO: Cellular Component    | GO:0016460 | myosin II complex                                                                                | 0.00000204 | 5  |
| GO: Cellular Component    | GO:0016459 | myosin complex                                                                                   | 0.00006074 | 5  |
| GO: Cellular Component    | GO:0043209 | myelin sheath                                                                                    | 0.003753   | 5  |
| GO: Cellular Component    | GO:0005911 | cell-cell junction                                                                               | 0.04683    | 5  |
| GO: Cellular Component    | GO:0005759 | mitochondrial matrix                                                                             | 0.04716    | 5  |
| GO: Cellular Component    | GO:0032982 | myosin filament                                                                                  | 0.0000311  | 4  |
| GO: Cellular Component    | GO:0001725 | stress fiber                                                                                     | 0.001081   | 4  |
| GO: Cellular Component    | GO:0097517 | contractile actin filament bundle                                                                | 0.001081   | 4  |
| GO: Cellular Component    | GO:0032432 | actin filament bundle                                                                            | 0.001285   | 4  |
| GO: Cellular Component    | GO:0042641 | actomyosin                                                                                       | 0.001285   | 4  |
| GO: Cellular Component    | GO:0005903 | brush border                                                                                     | 0.006305   | 4  |

|                        |            |                                         |             |   |
|------------------------|------------|-----------------------------------------|-------------|---|
| GO: Cellular Component | GO:0072562 | blood microparticle                     | 0.008216    | 4 |
| GO: Cellular Component | GO:0098862 | cluster of actin-based cell projections | 0.01649     | 4 |
| GO: Cellular Component | GO:0000151 | ubiquitin ligase complex                | 0.04822     | 4 |
| GO: Cellular Component | GO:0097513 | myosin II filament                      | 0.000002222 | 3 |
| GO: Cellular Component | GO:0042571 | immunoglobulin complex, circulating     | 0.001081    | 3 |
| GO: Cellular Component | GO:0019814 | immunoglobulin complex                  | 0.001285    | 3 |
| GO: Cellular Component | GO:1990204 | oxidoreductase complex                  | 0.02389     | 3 |
| GO: Cellular Component | GO:0042579 | microbody                               | 0.04859     | 3 |
| GO: Cellular Component | GO:0005777 | peroxisome                              | 0.04859     | 3 |
| GO: Cellular Component | GO:0036464 | cytoplasmic ribonucleoprotein granule   | 0.04878     | 3 |
| GO: Cellular Component | GO:0035770 | ribonucleoprotein granule               | 0.04878     | 3 |
| GO: Cellular Component | GO:0045252 | oxoglutarate dehydrogenase complex      | 0.002384    | 2 |
| GO: Cellular Component | GO:0045254 | pyruvate dehydrogenase complex          | 0.003753    | 2 |
| GO: Cellular Component | GO:0045240 | dihydrolipoyl dehydrogenase complex     | 0.005582    | 2 |
| GO: Cellular Component | GO:0045239 | tricarboxylic acid cycle enzyme complex | 0.008216    | 2 |
| GO: Cellular Component | GO:0030057 | desmosome                               | 0.02389     | 2 |
| GO: Cellular Component | GO:0008180 | COP9 signalosome                        | 0.03899     | 2 |
| GO: Cellular Component | GO:0097610 | cell surface furrow                     | 0.04878     | 2 |
| GO: Cellular Component | GO:0032154 | cleavage furrow                         | 0.04878     | 2 |
| GO: Cellular Component | GO:0005584 | collagen type I trimer                  | 0.04716     | 1 |
| GO: Cellular Component | GO:0070436 | Grb2-EGFR complex                       | 0.04716     | 1 |
| GO: Cellular Component | GO:0071756 | pentameric IgM immunoglobulin complex   | 0.04878     | 1 |
| GO: Cellular Component | GO:0071754 | IgM immunoglobulin complex, circulating | 0.04878     | 1 |
| GO: Cellular Component | GO:0043159 | acrosomal matrix                        | 0.04878     | 1 |
| GO: Cellular Component | GO:0071753 | IgM immunoglobulin complex              | 0.04878     | 1 |

**Table S2. Details of GO terms for SMURF2WT and SMURF2CG**

| <b>Increased in the presence of SMURF2WT</b> |            |                                                        |                                    |                                    |
|----------------------------------------------|------------|--------------------------------------------------------|------------------------------------|------------------------------------|
| <b>Category</b>                              | <b>ID</b>  | <b>Name</b>                                            | <b>q-value<br/>FDR<br/>B&amp;H</b> | <b>Hit Count in<br/>Query List</b> |
| <b>Molecular Functions</b>                   |            |                                                        |                                    |                                    |
| GO: Molecular Function                       | GO:0003723 | RNA binding                                            | 9.158E-33                          | 62                                 |
| GO: Molecular Function                       | GO:0005198 | structural molecule activity                           | 0.0006967                          | 17                                 |
| GO: Molecular Function                       | GO:0003735 | structural constituent of ribosome                     | 0.000002297                        | 12                                 |
| GO: Molecular Function                       | GO:0051082 | unfolded protein binding                               | 0.003506                           | 6                                  |
| GO: Molecular Function                       | GO:0003729 | mRNA binding                                           | 0.03022                            | 6                                  |
| GO: Molecular Function                       | GO:0003725 | double-stranded RNA binding                            | 0.03022                            | 4                                  |
| GO: Molecular Function                       | GO:0032552 | deoxyribonucleotide binding                            | 0.001554                           | 3                                  |
| GO: Molecular Function                       | GO:0017091 | AU-rich element binding                                | 0.02297                            | 3                                  |
| GO: Molecular Function                       | GO:0004532 | exoribonuclease activity                               | 0.0466                             | 3                                  |
| GO: Molecular Function                       | GO:0032556 | pyrimidine deoxyribonucleotide binding                 | 0.003506                           | 2                                  |
| GO: Molecular Function                       | GO:0004827 | proline-tRNA ligase activity                           | 0.008003                           | 2                                  |
| GO: Molecular Function                       | GO:0034604 | pyruvate dehydrogenase (NAD <sup>+</sup> ) activity    | 0.03022                            | 2                                  |
| GO: Molecular Function                       | GO:0034603 | pyruvate dehydrogenase [NAD(P) <sup>+</sup> ] activity | 0.03022                            | 2                                  |
| GO: Molecular Function                       | GO:1990247 | N6-methyladenosine-containing RNA binding              | 0.03022                            | 2                                  |
| GO: Molecular Function                       | GO:0004738 | pyruvate dehydrogenase activity                        | 0.03022                            | 2                                  |
| <b>Biological Processes</b>                  |            |                                                        |                                    |                                    |
| GO: Biological Process                       | GO:0006396 | RNA processing                                         | 3.698E-08                          | 26                                 |
| GO: Biological Process                       | GO:1901575 | organic substance catabolic process                    | 0.003539                           | 26                                 |
| GO: Biological Process                       | GO:1901566 | organonitrogen compound biosynthetic process           | 0.0001414                          | 25                                 |
| GO: Biological Process                       | GO:0016071 | mRNA metabolic process                                 | 3.412E-09                          | 24                                 |
| GO: Biological Process                       | GO:0065003 | protein-containing complex assembly                    | 0.009019                           | 24                                 |
| GO: Biological Process                       | GO:0044248 | cellular catabolic process                             | 0.009019                           | 24                                 |
| GO: Biological Process                       | GO:0043603 | cellular amide metabolic process                       | 0.00008153                         | 21                                 |

|                        |            |                                                                                      |             |    |
|------------------------|------------|--------------------------------------------------------------------------------------|-------------|----|
| GO: Biological Process | GO:0006412 | translation                                                                          | 0.000001342 | 20 |
| GO: Biological Process | GO:0043043 | peptide biosynthetic process                                                         | 0.000002046 | 20 |
| GO: Biological Process | GO:0043604 | amide biosynthetic process                                                           | 0.000007414 | 20 |
| GO: Biological Process | GO:0006518 | peptide metabolic process                                                            | 0.0000217   | 20 |
| GO: Biological Process | GO:0051276 | chromosome organization                                                              | 0.01109     | 18 |
| GO: Biological Process | GO:0022613 | ribonucleoprotein complex biogenesis                                                 | 0.000001342 | 17 |
| GO: Biological Process | GO:0034655 | nucleobase-containing compound catabolic process                                     | 0.000001648 | 16 |
| GO: Biological Process | GO:0044270 | cellular nitrogen compound catabolic process                                         | 0.000004172 | 16 |
| GO: Biological Process | GO:0046700 | heterocycle catabolic process                                                        | 0.000004172 | 16 |
| GO: Biological Process | GO:0019439 | aromatic compound catabolic process                                                  | 0.00000518  | 16 |
| GO: Biological Process | GO:1901361 | organic cyclic compound catabolic process                                            | 0.00001104  | 16 |
| GO: Biological Process | GO:0044265 | cellular macromolecule catabolic process                                             | 0.01061     | 16 |
| GO: Biological Process | GO:0006397 | mRNA processing                                                                      | 0.00002479  | 15 |
| GO: Biological Process | GO:0034660 | ncRNA metabolic process                                                              | 0.0001454   | 15 |
| GO: Biological Process | GO:0008380 | RNA splicing                                                                         | 0.00001993  | 14 |
| GO: Biological Process | GO:0007005 | mitochondrion organization                                                           | 0.009019    | 14 |
| GO: Biological Process | GO:0042254 | ribosome biogenesis                                                                  | 0.00001104  | 13 |
| GO: Biological Process | GO:0022411 | cellular component disassembly                                                       | 0.008144    | 13 |
| GO: Biological Process | GO:0045087 | innate immune response                                                               | 0.0373      | 13 |
| GO: Biological Process | GO:0000398 | mRNA splicing, via spliceosome                                                       | 0.00003633  | 12 |
| GO: Biological Process | GO:0000377 | RNA splicing, via transesterification reactions with bulged adenosine as nucleophile | 0.00003633  | 12 |
| GO: Biological Process | GO:0000375 | RNA splicing, via transesterification reactions                                      | 0.00003993  | 12 |
| GO: Biological Process | GO:0051259 | protein complex oligomerization                                                      | 0.004668    | 12 |
| GO: Biological Process | GO:0006325 | chromatin organization                                                               | 0.04562     | 12 |
| GO: Biological Process | GO:0034470 | ncRNA processing                                                                     | 0.002075    | 11 |
| GO: Biological Process | GO:0006414 | translational elongation                                                             | 0.000002049 | 10 |
| GO: Biological Process | GO:0006401 | RNA catabolic process                                                                | 0.0002263   | 10 |
| GO: Biological Process | GO:0006364 | rRNA processing                                                                      | 0.0003325   | 10 |
| GO: Biological Process | GO:0016072 | rRNA metabolic process                                                               | 0.0004064   | 10 |
| GO: Biological Process | GO:0032984 | protein-containing complex disassembly                                               | 0.0005266   | 10 |



|                        |            |                                                                     |             |    |
|------------------------|------------|---------------------------------------------------------------------|-------------|----|
| GO: Biological Process | GO:0016570 | histone modification                                                | 0.0139      | 10 |
| GO: Biological Process | GO:0016569 | covalent chromatin modification                                     | 0.01607     | 10 |
| GO: Biological Process | GO:0010608 | posttranscriptional regulation of gene expression                   | 0.01905     | 10 |
| GO: Biological Process | GO:0070125 | mitochondrial translational elongation                              | 0.000001342 | 9  |
| GO: Biological Process | GO:0070126 | mitochondrial translational termination                             | 0.000001342 | 9  |
| GO: Biological Process | GO:0006415 | translational termination                                           | 0.000002049 | 9  |
| GO: Biological Process | GO:0032543 | mitochondrial translation                                           | 0.000007414 | 9  |
| GO: Biological Process | GO:0000956 | nuclear-transcribed mRNA catabolic process                          | 0.0003224   | 9  |
| GO: Biological Process | GO:0043624 | cellular protein complex disassembly                                | 0.000448    | 9  |
| GO: Biological Process | GO:0006402 | mRNA catabolic process                                              | 0.0005235   | 9  |
| GO: Biological Process | GO:0033044 | regulation of chromosome organization                               | 0.004366    | 9  |
| GO: Biological Process | GO:0006403 | RNA localization                                                    | 0.002698    | 8  |
| GO: Biological Process | GO:0009266 | response to temperature stimulus                                    | 0.004386    | 8  |
| GO: Biological Process | GO:0051262 | protein tetramerization                                             | 0.002362    | 7  |
| GO: Biological Process | GO:0009408 | response to heat                                                    | 0.004082    | 7  |
| GO: Biological Process | GO:0000184 | nuclear-transcribed mRNA catabolic process, nonsense-mediated decay | 0.004366    | 6  |
| GO: Biological Process | GO:2001252 | positive regulation of chromosome organization                      | 0.0135      | 6  |
| GO: Biological Process | GO:0006399 | tRNA metabolic process                                              | 0.02125     | 6  |
| GO: Biological Process | GO:0006413 | translational initiation                                            | 0.02809     | 6  |
| GO: Biological Process | GO:0071229 | cellular response to acid chemical                                  | 0.03342     | 6  |
| GO: Biological Process | GO:0006369 | termination of RNA polymerase II transcription                      | 0.002291    | 5  |
| GO: Biological Process | GO:0051289 | protein homotetramerization                                         | 0.003775    | 5  |
| GO: Biological Process | GO:0006353 | DNA-templated transcription, termination                            | 0.01366     | 5  |
| GO: Biological Process | GO:0031123 | RNA 3'-end processing                                               | 0.02132     | 5  |
| GO: Biological Process | GO:0071346 | cellular response to interferon-gamma                               | 0.03342     | 5  |
| GO: Biological Process | GO:0000723 | telomere maintenance                                                | 0.03342     | 5  |
| GO: Biological Process | GO:0031056 | regulation of histone modification                                  | 0.03727     | 5  |
| GO: Biological Process | GO:0032200 | telomere organization                                               | 0.04436     | 5  |
| GO: Biological Process | GO:0008334 | histone mRNA metabolic process                                      | 0.001532    | 4  |
| GO: Biological Process | GO:0000460 | maturation of 5.8S rRNA                                             | 0.002362    | 4  |

|                        |            |                                                                   |          |   |
|------------------------|------------|-------------------------------------------------------------------|----------|---|
| GO: Biological Process | GO:0000387 | spliceosomal snRNP assembly                                       | 0.004226 | 4 |
| GO: Biological Process | GO:0007004 | telomere maintenance via telomerase                               | 0.0132   | 4 |
| GO: Biological Process | GO:0006278 | RNA-dependent DNA biosynthetic process                            | 0.01905  | 4 |
| GO: Biological Process | GO:0010833 | telomere maintenance via telomere lengthening                     | 0.0197   | 4 |
| GO: Biological Process | GO:0032204 | regulation of telomere maintenance                                | 0.02043  | 4 |
| GO: Biological Process | GO:1900034 | regulation of cellular response to heat                           | 0.02809  | 4 |
| GO: Biological Process | GO:0060333 | interferon-gamma-mediated signaling pathway                       | 0.03549  | 4 |
| GO: Biological Process | GO:0031058 | positive regulation of histone modification                       | 0.04214  | 4 |
| GO: Biological Process | GO:0009124 | nucleoside monophosphate biosynthetic process                     | 0.04562  | 4 |
| GO: Biological Process | GO:0006614 | SRP-dependent cotranslational protein targeting to membrane       | 0.04562  | 4 |
| GO: Biological Process | GO:0071028 | nuclear mRNA surveillance                                         | 0.002525 | 3 |
| GO: Biological Process | GO:0071027 | nuclear RNA surveillance                                          | 0.002525 | 3 |
| GO: Biological Process | GO:0009143 | nucleoside triphosphate catabolic process                         | 0.003112 | 3 |
| GO: Biological Process | GO:0071025 | RNA surveillance                                                  | 0.003764 | 3 |
| GO: Biological Process | GO:0016075 | rRNA catabolic process                                            | 0.006753 | 3 |
| GO: Biological Process | GO:0034661 | ncRNA catabolic process                                           | 0.01509  | 3 |
| GO: Biological Process | GO:0070198 | protein localization to chromosome, telomeric region              | 0.01697  | 3 |
| GO: Biological Process | GO:0009394 | 2'-deoxyribonucleotide metabolic process                          | 0.02736  | 3 |
| GO: Biological Process | GO:0090503 | RNA phosphodiester bond hydrolysis, exonucleolytic                | 0.02809  | 3 |
| GO: Biological Process | GO:0019692 | deoxyribose phosphate metabolic process                           | 0.02916  | 3 |
| GO: Biological Process | GO:0042769 | DNA damage response, detection of DNA damage                      | 0.02916  | 3 |
| GO: Biological Process | GO:0009262 | deoxyribonucleotide metabolic process                             | 0.03381  | 3 |
| GO: Biological Process | GO:0032210 | regulation of telomere maintenance via telomerase                 | 0.04562  | 3 |
| GO: Biological Process | GO:0009177 | pyrimidine deoxyribonucleoside monophosphate biosynthetic process | 0.004566 | 2 |
| GO: Biological Process | GO:0006433 | prolyl-tRNA aminoacylation                                        | 0.004566 | 2 |
| GO: Biological Process | GO:0009176 | pyrimidine deoxyribonucleoside monophosphate metabolic process    | 0.008445 | 2 |
| GO: Biological Process | GO:0071029 | nuclear ncRNA surveillance                                        | 0.01607  | 2 |
| GO: Biological Process | GO:0043634 | polyadenylation-dependent ncRNA catabolic process                 | 0.01607  | 2 |
| GO: Biological Process | GO:0042791 | 5S class rRNA transcription by RNA polymerase III                 | 0.01607  | 2 |
| GO: Biological Process | GO:0071035 | nuclear polyadenylation-dependent rRNA catabolic process          | 0.01607  | 2 |

|                        |            |                                                                             |         |   |
|------------------------|------------|-----------------------------------------------------------------------------|---------|---|
| GO: Biological Process | GO:0042797 | tRNA transcription by RNA polymerase III                                    | 0.01607 | 2 |
| GO: Biological Process | GO:0071046 | nuclear polyadenylation-dependent ncRNA catabolic process                   | 0.01607 | 2 |
| GO: Biological Process | GO:0009221 | pyrimidine deoxyribonucleotide biosynthetic process                         | 0.0197  | 2 |
| GO: Biological Process | GO:0009204 | deoxyribonucleoside triphosphate catabolic process                          | 0.0197  | 2 |
| GO: Biological Process | GO:0043633 | polyadenylation-dependent RNA catabolic process                             | 0.0197  | 2 |
| GO: Biological Process | GO:0009157 | deoxyribonucleoside monophosphate biosynthetic process                      | 0.0197  | 2 |
| GO: Biological Process | GO:0061732 | mitochondrial acetyl-CoA biosynthetic process from pyruvate                 | 0.0197  | 2 |
| GO: Biological Process | GO:0009304 | tRNA transcription                                                          | 0.0197  | 2 |
| GO: Biological Process | GO:0034475 | U4 snRNA 3'-end processing                                                  | 0.02413 | 2 |
| GO: Biological Process | GO:1904869 | regulation of protein localization to Cajal body                            | 0.02413 | 2 |
| GO: Biological Process | GO:1904871 | positive regulation of protein localization to Cajal body                   | 0.02413 | 2 |
| GO: Biological Process | GO:1901897 | regulation of relaxation of cardiac muscle                                  | 0.02413 | 2 |
| GO: Biological Process | GO:1904867 | protein localization to Cajal body                                          | 0.02809 | 2 |
| GO: Biological Process | GO:1990173 | protein localization to nucleoplasm                                         | 0.02809 | 2 |
| GO: Biological Process | GO:1904851 | positive regulation of establishment of protein localization to telomere    | 0.02809 | 2 |
| GO: Biological Process | GO:0034427 | nuclear-transcribed mRNA catabolic process, exonucleolytic, 3'-5'           | 0.02809 | 2 |
| GO: Biological Process | GO:1903405 | protein localization to nuclear body                                        | 0.02809 | 2 |
| GO: Biological Process | GO:0009162 | deoxyribonucleoside monophosphate metabolic process                         | 0.03267 | 2 |
| GO: Biological Process | GO:0070203 | regulation of establishment of protein localization to telomere             | 0.03267 | 2 |
| GO: Biological Process | GO:0009265 | 2'-deoxyribonucleotide biosynthetic process                                 | 0.03267 | 2 |
| GO: Biological Process | GO:0034472 | snRNA 3'-end processing                                                     | 0.03267 | 2 |
| GO: Biological Process | GO:0046385 | deoxyribose phosphate biosynthetic process                                  | 0.03267 | 2 |
| GO: Biological Process | GO:1901077 | regulation of relaxation of muscle                                          | 0.03727 | 2 |
| GO: Biological Process | GO:0070202 | regulation of establishment of protein localization to chromosome           | 0.03727 | 2 |
| GO: Biological Process | GO:0010510 | regulation of acetyl-CoA biosynthetic process from pyruvate                 | 0.04214 | 2 |
| GO: Biological Process | GO:0009113 | purine nucleobase biosynthetic process                                      | 0.04214 | 2 |
| GO: Biological Process | GO:1904816 | positive regulation of protein localization to chromosome, telomeric region | 0.04214 | 2 |
| GO: Biological Process | GO:0051085 | chaperone cofactor-dependent protein refolding                              | 0.04214 | 2 |
| GO: Biological Process | GO:0009263 | deoxyribonucleotide biosynthetic process                                    | 0.04562 | 2 |
| GO: Biological Process | GO:0031125 | rRNA 3'-end processing                                                      | 0.04562 | 2 |

|                            |            |                                                          |             |    |
|----------------------------|------------|----------------------------------------------------------|-------------|----|
| GO: Biological Process     | GO:0050812 | regulation of acyl-CoA biosynthetic process              | 0.04562     | 2  |
| GO: Biological Process     | GO:0000244 | spliceosomal tri-snRNP complex assembly                  | 0.04562     | 2  |
| GO: Biological Process     | GO:0009130 | pyrimidine nucleoside monophosphate biosynthetic process | 0.04562     | 2  |
| <b>Cellular Components</b> |            |                                                          |             |    |
| GO: Cellular Component     | GO:1990904 | ribonucleoprotein complex                                | 1.748E-18   | 34 |
| GO: Cellular Component     | GO:0005730 | nucleolus                                                | 5.593E-08   | 24 |
| GO: Cellular Component     | GO:0005840 | ribosome                                                 | 1.889E-09   | 15 |
| GO: Cellular Component     | GO:0044429 | mitochondrial part                                       | 0.01025     | 15 |
| GO: Cellular Component     | GO:0005759 | mitochondrial matrix                                     | 0.00006934  | 13 |
| GO: Cellular Component     | GO:0044451 | nucleoplasm part                                         | 0.007366    | 13 |
| GO: Cellular Component     | GO:0044391 | ribosomal subunit                                        | 7.057E-07   | 11 |
| GO: Cellular Component     | GO:0005743 | mitochondrial inner membrane                             | 0.005224    | 11 |
| GO: Cellular Component     | GO:0019866 | organelle inner membrane                                 | 0.007771    | 11 |
| GO: Cellular Component     | GO:0031966 | mitochondrial membrane                                   | 0.02521     | 11 |
| GO: Cellular Component     | GO:0005740 | mitochondrial envelope                                   | 0.0348      | 11 |
| GO: Cellular Component     | GO:0000313 | organellar ribosome                                      | 0.000001329 | 8  |
| GO: Cellular Component     | GO:0005761 | mitochondrial ribosome                                   | 0.000001329 | 8  |
| GO: Cellular Component     | GO:0015935 | small ribosomal subunit                                  | 0.00001172  | 7  |
| GO: Cellular Component     | GO:0005681 | spliceosomal complex                                     | 0.002258    | 7  |
| GO: Cellular Component     | GO:0044445 | cytosolic part                                           | 0.007438    | 7  |
| GO: Cellular Component     | GO:0005667 | transcription factor complex                             | 0.0414      | 7  |
| GO: Cellular Component     | GO:0016607 | nuclear speck                                            | 0.01339     | 6  |
| GO: Cellular Component     | GO:0071013 | catalytic step 2 spliceosome                             | 0.004861    | 5  |
| GO: Cellular Component     | GO:0016363 | nuclear matrix                                           | 0.007366    | 5  |
| GO: Cellular Component     | GO:0034399 | nuclear periphery                                        | 0.01339     | 5  |
| GO: Cellular Component     | GO:0005763 | mitochondrial small ribosomal subunit                    | 0.000732    | 4  |
| GO: Cellular Component     | GO:0000314 | organellar small ribosomal subunit                       | 0.000732    | 4  |
| GO: Cellular Component     | GO:0097525 | spliceosomal snRNP complex                               | 0.005894    | 4  |
| GO: Cellular Component     | GO:0030532 | small nuclear ribonucleoprotein complex                  | 0.007366    | 4  |
| GO: Cellular Component     | GO:0034708 | methyltransferase complex                                | 0.0198      | 4  |

|                        |            |                                                     |          |   |
|------------------------|------------|-----------------------------------------------------|----------|---|
| GO: Cellular Component | GO:0015934 | large ribosomal subunit                             | 0.0285   | 4 |
| GO: Cellular Component | GO:0022626 | cytosolic ribosome                                  | 0.03785  | 4 |
| GO: Cellular Component | GO:0034709 | methylosome                                         | 0.001308 | 3 |
| GO: Cellular Component | GO:0000176 | nuclear exosome (RNase complex)                     | 0.002258 | 3 |
| GO: Cellular Component | GO:0000178 | exosome (RNase complex)                             | 0.005224 | 3 |
| GO: Cellular Component | GO:0005689 | U12-type spliceosomal complex                       | 0.007366 | 3 |
| GO: Cellular Component | GO:0005762 | mitochondrial large ribosomal subunit               | 0.01339  | 3 |
| GO: Cellular Component | GO:0000315 | organellar large ribosomal subunit                  | 0.01339  | 3 |
| GO: Cellular Component | GO:0022627 | cytosolic small ribosomal subunit                   | 0.0198   | 3 |
| GO: Cellular Component | GO:0034715 | pICln-Sm protein complex                            | 0.007366 | 2 |
| GO: Cellular Component | GO:0000127 | transcription factor TFIIIC complex                 | 0.007366 | 2 |
| GO: Cellular Component | GO:0005683 | U7 snRNP                                            | 0.009087 | 2 |
| GO: Cellular Component | GO:0090576 | RNA polymerase III transcription factor complex     | 0.01082  | 2 |
| GO: Cellular Component | GO:0045254 | pyruvate dehydrogenase complex                      | 0.01082  | 2 |
| GO: Cellular Component | GO:0005832 | chaperonin-containing T-complex                     | 0.01339  | 2 |
| GO: Cellular Component | GO:0005687 | U4 snRNP                                            | 0.01429  | 2 |
| GO: Cellular Component | GO:0002199 | zona pellucida receptor complex                     | 0.01692  | 2 |
| GO: Cellular Component | GO:0000346 | transcription export complex                        | 0.02197  | 2 |
| GO: Cellular Component | GO:0000177 | cytoplasmic exosome (RNase complex)                 | 0.02792  | 2 |
| GO: Cellular Component | GO:0034719 | SMN-Sm protein complex                              | 0.03343  | 2 |
| GO: Cellular Component | GO:0005685 | U1 snRNP                                            | 0.03343  | 2 |
| GO: Cellular Component | GO:0005686 | U2 snRNP                                            | 0.03785  | 2 |
| GO: Cellular Component | GO:0005697 | telomerase holoenzyme complex                       | 0.03785  | 2 |
| GO: Cellular Component | GO:0035327 | transcriptionally active chromatin                  | 0.0414   | 2 |
| GO: Cellular Component | GO:0045120 | pronucleus                                          | 0.0414   | 2 |
| GO: Cellular Component | GO:0046540 | U4/U6 x U5 tri-snRNP complex                        | 0.04772  | 2 |
| GO: Cellular Component | GO:0071011 | pre-catalytic spliceosome                           | 0.04772  | 2 |
| GO: Cellular Component | GO:0005691 | U6atac snRNP                                        | 0.03785  | 1 |
| GO: Cellular Component | GO:0071002 | U4atac/U6atac snRNP                                 | 0.03785  | 1 |
| GO: Cellular Component | GO:1990826 | nucleoplasmic periphery of the nuclear pore complex | 0.03785  | 1 |

| Decreased in the presence of SMURF2WT |            |                                                                                    |                    |                               |
|---------------------------------------|------------|------------------------------------------------------------------------------------|--------------------|-------------------------------|
| Category                              | ID         | Name                                                                               | q-value<br>FDR B&H | Hit Count<br>in Query<br>List |
| <b>Molecular Functions</b>            |            |                                                                                    |                    |                               |
| GO: Molecular Function                | GO:0015183 | L-aspartate transmembrane transporter activity                                     | 0.01054            | 1                             |
| GO: Molecular Function                | GO:0070191 | methionine-R-sulfoxide reductase activity                                          | 0.01054            | 1                             |
| GO: Molecular Function                | GO:0033743 | peptide-methionine (R)-S-oxide reductase activity                                  | 0.01054            | 1                             |
| GO: Molecular Function                | GO:0015556 | C4-dicarboxylate transmembrane transporter activity                                | 0.01054            | 1                             |
| GO: Molecular Function                | GO:0008113 | peptide-methionine (S)-S-oxide reductase activity                                  | 0.01054            | 1                             |
| GO: Molecular Function                | GO:0005313 | L-glutamate transmembrane transporter activity                                     | 0.01098            | 1                             |
| GO: Molecular Function                | GO:0051787 | misfolded protein binding                                                          | 0.01098            | 1                             |
| GO: Molecular Function                | GO:0015172 | acidic amino acid transmembrane transporter activity                               | 0.01098            | 1                             |
| GO: Molecular Function                | GO:0016671 | oxidoreductase activity, acting on a sulfur group of donors, disulfide as acceptor | 0.01098            | 1                             |
| GO: Molecular Function                | GO:0001671 | ATPase activator activity                                                          | 0.01185            | 1                             |
| GO: Molecular Function                | GO:0015035 | protein disulfide oxidoreductase activity                                          | 0.01436            | 1                             |
| GO: Molecular Function                | GO:0005310 | dicarboxylic acid transmembrane transporter activity                               | 0.01491            | 1                             |
| GO: Molecular Function                | GO:0060590 | ATPase regulator activity                                                          | 0.01491            | 1                             |
| GO: Molecular Function                | GO:0015036 | disulfide oxidoreductase activity                                                  | 0.01491            | 1                             |
| GO: Molecular Function                | GO:0030544 | Hsp70 protein binding                                                              | 0.01491            | 1                             |
| GO: Molecular Function                | GO:0016667 | oxidoreductase activity, acting on a sulfur group of donors                        | 0.02126            | 1                             |
| GO: Molecular Function                | GO:0015179 | L-amino acid transmembrane transporter activity                                    | 0.02126            | 1                             |
| GO: Molecular Function                | GO:0015171 | amino acid transmembrane transporter activity                                      | 0.02832            | 1                             |
| GO: Molecular Function                | GO:0051087 | chaperone binding                                                                  | 0.02832            | 1                             |
| GO: Molecular Function                | GO:0051117 | ATPase binding                                                                     | 0.02854            | 1                             |
| GO: Molecular Function                | GO:0003697 | single-stranded DNA binding                                                        | 0.03158            | 1                             |
| GO: Molecular Function                | GO:0031072 | heat shock protein binding                                                         | 0.03158            | 1                             |
| GO: Molecular Function                | GO:0046943 | carboxylic acid transmembrane transporter activity                                 | 0.03925            | 1                             |

|                             |            |                                                  |         |   |
|-----------------------------|------------|--------------------------------------------------|---------|---|
| GO: Molecular Function      | GO:0005342 | organic acid transmembrane transporter activity  | 0.03925 | 1 |
| GO: Molecular Function      | GO:0008514 | organic anion transmembrane transporter activity | 0.04778 | 1 |
| <b>Biological Processes</b> |            |                                                  |         |   |
| GO: Biological Process      | GO:0043490 | malate-aspartate shuttle                         | 0.04339 | 1 |
| GO: Biological Process      | GO:0070778 | L-aspartate transmembrane transport              | 0.04339 | 1 |
| GO: Biological Process      | GO:0051096 | positive regulation of helicase activity         | 0.04339 | 1 |
| GO: Biological Process      | GO:0051095 | regulation of helicase activity                  | 0.04339 | 1 |
| GO: Biological Process      | GO:0034975 | protein folding in endoplasmic reticulum         | 0.04339 | 1 |
| GO: Biological Process      | GO:0015810 | aspartate transmembrane transport                | 0.04339 | 1 |
| GO: Biological Process      | GO:0015740 | C4-dicarboxylate transport                       | 0.04395 | 1 |
| <b>Cellular Components</b>  |            |                                                  |         |   |
| GO: Cellular Component      | GO:0044429 | mitochondrial part                               | 0.03298 | 2 |
| GO: Cellular Component      | GO:0034663 | endoplasmic reticulum chaperone complex          | 0.03209 | 1 |
| GO: Cellular Component      | GO:0042645 | mitochondrial nucleoid                           | 0.03298 | 1 |
| GO: Cellular Component      | GO:0009295 | nucleoid                                         | 0.03298 | 1 |

| <b>Increased in the presence of SMURF2CG</b> |            |                                    |                            |                                |
|----------------------------------------------|------------|------------------------------------|----------------------------|--------------------------------|
| <b>Category</b>                              | <b>ID</b>  | <b>Name</b>                        | <b>q-value FDR B&amp;H</b> | <b>Hit Count in Query List</b> |
| <b>Molecular Functions</b>                   |            |                                    |                            |                                |
| GO: Molecular Function                       | GO:0003723 | RNA binding                        | 3.11E-28                   | 58                             |
| GO: Molecular Function                       | GO:0042802 | identical protein binding          | 0.001063                   | 23                             |
| GO: Molecular Function                       | GO:0030554 | adenyl nucleotide binding          | 0.01139                    | 22                             |
| GO: Molecular Function                       | GO:0044877 | protein-containing complex binding | 0.03523                    | 21                             |
| GO: Molecular Function                       | GO:0046983 | protein dimerization activity      | 0.01139                    | 20                             |
| GO: Molecular Function                       | GO:0005524 | ATP binding                        | 0.03421                    | 20                             |
| GO: Molecular Function                       | GO:0032559 | adenyl ribonucleotide binding      | 0.03523                    | 20                             |
| GO: Molecular Function                       | GO:0005198 | structural molecule activity       | 0.0007496                  | 17                             |
| GO: Molecular Function                       | GO:0008092 | cytoskeletal protein binding       | 0.03558                    | 14                             |

|                             |            |                                                                                    |             |    |
|-----------------------------|------------|------------------------------------------------------------------------------------|-------------|----|
| GO: Molecular Function      | GO:0003735 | structural constituent of ribosome                                                 | 2.135E-07   | 13 |
| GO: Molecular Function      | GO:0017111 | nucleoside-triphosphatase activity                                                 | 0.03558     | 13 |
| GO: Molecular Function      | GO:0016462 | pyrophosphatase activity                                                           | 0.04873     | 13 |
| GO: Molecular Function      | GO:0016818 | hydrolase activity, acting on acid anhydrides, in phosphorus-containing anhydrides | 0.04873     | 13 |
| GO: Molecular Function      | GO:0016817 | hydrolase activity, acting on acid anhydrides                                      | 0.04873     | 13 |
| GO: Molecular Function      | GO:0016887 | ATPase activity                                                                    | 0.002074    | 12 |
| GO: Molecular Function      | GO:0046982 | protein heterodimerization activity                                                | 0.03421     | 11 |
| GO: Molecular Function      | GO:0019843 | rRNA binding                                                                       | 0.03421     | 4  |
| GO: Molecular Function      | GO:0004045 | aminoacyl-tRNA hydrolase activity                                                  | 0.02247     | 2  |
| GO: Molecular Function      | GO:0036402 | proteasome-activating ATPase activity                                              | 0.02984     | 2  |
| <b>Biological Processes</b> |            |                                                                                    |             |    |
| GO: Biological Process      | GO:0065003 | protein-containing complex assembly                                                | 0.000000395 | 34 |
| GO: Biological Process      | GO:1901566 | organonitrogen compound biosynthetic process                                       | 3.448E-08   | 32 |
| GO: Biological Process      | GO:0043603 | cellular amide metabolic process                                                   | 7.921E-09   | 28 |
| GO: Biological Process      | GO:0043604 | amide biosynthetic process                                                         | 3.346E-10   | 27 |
| GO: Biological Process      | GO:0006518 | peptide metabolic process                                                          | 4.85E-09    | 26 |
| GO: Biological Process      | GO:0006412 | translation                                                                        | 3.346E-10   | 25 |
| GO: Biological Process      | GO:0043043 | peptide biosynthetic process                                                       | 5.733E-10   | 25 |
| GO: Biological Process      | GO:0006396 | RNA processing                                                                     | 5.384E-08   | 25 |
| GO: Biological Process      | GO:0034622 | cellular protein-containing complex assembly                                       | 2.486E-07   | 25 |
| GO: Biological Process      | GO:0051276 | chromosome organization                                                            | 0.0002516   | 22 |
| GO: Biological Process      | GO:0009890 | negative regulation of biosynthetic process                                        | 0.03419     | 21 |
| GO: Biological Process      | GO:0010558 | negative regulation of macromolecule biosynthetic process                          | 0.0372      | 20 |
| GO: Biological Process      | GO:0016071 | mRNA metabolic process                                                             | 0.00001725  | 18 |
| GO: Biological Process      | GO:0006325 | chromatin organization                                                             | 0.0001171   | 18 |
| GO: Biological Process      | GO:0022613 | ribonucleoprotein complex biogenesis                                               | 6.904E-07   | 17 |
| GO: Biological Process      | GO:0022411 | cellular component disassembly                                                     | 0.0002516   | 16 |
| GO: Biological Process      | GO:0007005 | mitochondrion organization                                                         | 0.00123     | 16 |
| GO: Biological Process      | GO:0034660 | ncRNA metabolic process                                                            | 0.0001824   | 15 |
| GO: Biological Process      | GO:0032984 | protein-containing complex disassembly                                             | 0.000002452 | 13 |



|                        |            |                                                                                      |             |    |
|------------------------|------------|--------------------------------------------------------------------------------------|-------------|----|
| GO: Biological Process | GO:0008380 | RNA splicing                                                                         | 0.0001214   | 13 |
| GO: Biological Process | GO:0006397 | mRNA processing                                                                      | 0.0005605   | 13 |
| GO: Biological Process | GO:0006414 | translational elongation                                                             | 1.535E-08   | 12 |
| GO: Biological Process | GO:0043624 | cellular protein complex disassembly                                                 | 0.000001209 | 12 |
| GO: Biological Process | GO:0000398 | mRNA splicing, via spliceosome                                                       | 0.00004932  | 12 |
| GO: Biological Process | GO:0000377 | RNA splicing, via transesterification reactions with bulged adenosine as nucleophile | 0.00004932  | 12 |
| GO: Biological Process | GO:0000375 | RNA splicing, via transesterification reactions                                      | 0.00005396  | 12 |
| GO: Biological Process | GO:0032543 | mitochondrial translation                                                            | 4.848E-08   | 11 |
| GO: Biological Process | GO:0042254 | ribosome biogenesis                                                                  | 0.0003754   | 11 |
| GO: Biological Process | GO:0034470 | ncRNA processing                                                                     | 0.002104    | 11 |
| GO: Biological Process | GO:0010608 | posttranscriptional regulation of gene expression                                    | 0.008489    | 11 |
| GO: Biological Process | GO:0070125 | mitochondrial translational elongation                                               | 3.448E-08   | 10 |
| GO: Biological Process | GO:0070126 | mitochondrial translational termination                                              | 3.45E-08    | 10 |
| GO: Biological Process | GO:0006415 | translational termination                                                            | 1.065E-07   | 10 |
| GO: Biological Process | GO:0065004 | protein-DNA complex assembly                                                         | 0.0001284   | 10 |
| GO: Biological Process | GO:0071824 | protein-DNA complex subunit organization                                             | 0.0002861   | 10 |
| GO: Biological Process | GO:0031497 | chromatin assembly                                                                   | 0.00007965  | 9  |
| GO: Biological Process | GO:0006333 | chromatin assembly or disassembly                                                    | 0.0002238   | 9  |
| GO: Biological Process | GO:0006323 | DNA packaging                                                                        | 0.0003868   | 9  |
| GO: Biological Process | GO:0022618 | ribonucleoprotein complex assembly                                                   | 0.0004061   | 9  |
| GO: Biological Process | GO:0071826 | ribonucleoprotein complex subunit organization                                       | 0.0005605   | 9  |
| GO: Biological Process | GO:0006364 | rRNA processing                                                                      | 0.002041    | 9  |
| GO: Biological Process | GO:0016072 | rRNA metabolic process                                                               | 0.002335    | 9  |
| GO: Biological Process | GO:0071103 | DNA conformation change                                                              | 0.003776    | 9  |
| GO: Biological Process | GO:0034655 | nucleobase-containing compound catabolic process                                     | 0.0372      | 9  |
| GO: Biological Process | GO:0006334 | nucleosome assembly                                                                  | 0.0002516   | 8  |
| GO: Biological Process | GO:0034728 | nucleosome organization                                                              | 0.0007141   | 8  |
| GO: Biological Process | GO:0009167 | purine ribonucleoside monophosphate metabolic process                                | 0.01541     | 8  |
| GO: Biological Process | GO:0009126 | purine nucleoside monophosphate metabolic process                                    | 0.01549     | 8  |
| GO: Biological Process | GO:0009161 | ribonucleoside monophosphate metabolic process                                       | 0.0193      | 8  |

|                        |            |                                                                     |          |   |
|------------------------|------------|---------------------------------------------------------------------|----------|---|
| GO: Biological Process | GO:0009123 | nucleoside monophosphate metabolic process                          | 0.02362  | 8 |
| GO: Biological Process | GO:0006417 | regulation of translation                                           | 0.04234  | 8 |
| GO: Biological Process | GO:1900182 | positive regulation of protein localization to nucleus              | 0.001458 | 7 |
| GO: Biological Process | GO:1900180 | regulation of protein localization to nucleus                       | 0.02489  | 7 |
| GO: Biological Process | GO:0050821 | protein stabilization                                               | 0.01184  | 6 |
| GO: Biological Process | GO:0000956 | nuclear-transcribed mRNA catabolic process                          | 0.04666  | 6 |
| GO: Biological Process | GO:0009168 | purine ribonucleoside monophosphate biosynthetic process            | 0.004817 | 5 |
| GO: Biological Process | GO:0009127 | purine nucleoside monophosphate biosynthetic process                | 0.004817 | 5 |
| GO: Biological Process | GO:0009156 | ribonucleoside monophosphate biosynthetic process                   | 0.009231 | 5 |
| GO: Biological Process | GO:0009124 | nucleoside monophosphate biosynthetic process                       | 0.01345  | 5 |
| GO: Biological Process | GO:0000184 | nuclear-transcribed mRNA catabolic process, nonsense-mediated decay | 0.03314  | 5 |
| GO: Biological Process | GO:0000183 | chromatin silencing at rDNA                                         | 0.005855 | 4 |
| GO: Biological Process | GO:0042274 | ribosomal small subunit biogenesis                                  | 0.02661  | 4 |
| GO: Biological Process | GO:0045815 | positive regulation of gene expression, epigenetic                  | 0.04666  | 4 |
| GO: Biological Process | GO:0006188 | IMP biosynthetic process                                            | 0.002104 | 3 |
| GO: Biological Process | GO:0046040 | IMP metabolic process                                               | 0.004236 | 3 |
| GO: Biological Process | GO:0002227 | innate immune response in mucosa                                    | 0.01842  | 3 |
| GO: Biological Process | GO:0006735 | NADH regeneration                                                   | 0.02186  | 3 |
| GO: Biological Process | GO:0061718 | glucose catabolic process to pyruvate                               | 0.02186  | 3 |
| GO: Biological Process | GO:0061621 | canonical glycolysis                                                | 0.02186  | 3 |
| GO: Biological Process | GO:0061620 | glycolytic process through glucose-6-phosphate                      | 0.02795  | 3 |
| GO: Biological Process | GO:0061615 | glycolytic process through fructose-6-phosphate                     | 0.02998  | 3 |
| GO: Biological Process | GO:0009303 | rRNA transcription                                                  | 0.03643  | 3 |
| GO: Biological Process | GO:0006007 | glucose catabolic process                                           | 0.03643  | 3 |
| GO: Biological Process | GO:0002385 | mucosal immune response                                             | 0.04234  | 3 |
| GO: Biological Process | GO:0002251 | organ or tissue specific immune response                            | 0.04666  | 3 |
| GO: Biological Process | GO:0006189 | 'de novo' IMP biosynthetic process                                  | 0.02231  | 2 |
| GO: Biological Process | GO:0003360 | brainstem development                                               | 0.02871  | 2 |
| GO: Biological Process | GO:1904869 | regulation of protein localization to Cajal body                    | 0.03541  | 2 |
| GO: Biological Process | GO:1904871 | positive regulation of protein localization to Cajal body           | 0.03541  | 2 |

|                            |            |                                                                          |            |    |
|----------------------------|------------|--------------------------------------------------------------------------|------------|----|
| GO: Biological Process     | GO:1904867 | protein localization to Cajal body                                       | 0.04069    | 2  |
| GO: Biological Process     | GO:1990173 | protein localization to nucleoplasm                                      | 0.04069    | 2  |
| GO: Biological Process     | GO:1904851 | positive regulation of establishment of protein localization to telomere | 0.04069    | 2  |
| GO: Biological Process     | GO:1903405 | protein localization to nuclear body                                     | 0.04069    | 2  |
| GO: Biological Process     | GO:0070203 | regulation of establishment of protein localization to telomere          | 0.04666    | 2  |
| GO: Biological Process     | GO:2000109 | regulation of macrophage apoptotic process                               | 0.04666    | 2  |
| <b>Cellular Components</b> |            |                                                                          |            |    |
| GO: Cellular Component     | GO:1990904 | ribonucleoprotein complex                                                | 3.911E-16  | 32 |
| GO: Cellular Component     | GO:0005739 | mitochondrion                                                            | 0.0001714  | 27 |
| GO: Cellular Component     | GO:0044430 | cytoskeletal part                                                        | 0.003519   | 21 |
| GO: Cellular Component     | GO:0005730 | nucleolus                                                                | 0.0001863  | 18 |
| GO: Cellular Component     | GO:0044427 | chromosomal part                                                         | 0.0002774  | 17 |
| GO: Cellular Component     | GO:0005694 | chromosome                                                               | 0.0009335  | 17 |
| GO: Cellular Component     | GO:0044429 | mitochondrial part                                                       | 0.001384   | 17 |
| GO: Cellular Component     | GO:0005840 | ribosome                                                                 | 2.109E-10  | 16 |
| GO: Cellular Component     | GO:0031967 | organelle envelope                                                       | 0.01457    | 16 |
| GO: Cellular Component     | GO:0031975 | envelope                                                                 | 0.01465    | 16 |
| GO: Cellular Component     | GO:0000785 | chromatin                                                                | 0.00001594 | 15 |
| GO: Cellular Component     | GO:0043005 | neuron projection                                                        | 0.03225    | 15 |
| GO: Cellular Component     | GO:0005759 | mitochondrial matrix                                                     | 0.00001598 | 14 |
| GO: Cellular Component     | GO:0019866 | organelle inner membrane                                                 | 0.0002047  | 14 |
| GO: Cellular Component     | GO:0015630 | microtubule cytoskeleton                                                 | 0.04078    | 14 |
| GO: Cellular Component     | GO:0044391 | ribosomal subunit                                                        | 7.008E-09  | 13 |
| GO: Cellular Component     | GO:0005743 | mitochondrial inner membrane                                             | 0.0002774  | 13 |
| GO: Cellular Component     | GO:0031966 | mitochondrial membrane                                                   | 0.003519   | 13 |
| GO: Cellular Component     | GO:0005740 | mitochondrial envelope                                                   | 0.005569   | 13 |
| GO: Cellular Component     | GO:0044454 | nuclear chromosome part                                                  | 0.001374   | 12 |
| GO: Cellular Component     | GO:0000228 | nuclear chromosome                                                       | 0.002361   | 12 |
| GO: Cellular Component     | GO:0099513 | polymeric cytoskeletal fiber                                             | 0.02534    | 11 |
| GO: Cellular Component     | GO:0099512 | supramolecular fiber                                                     | 0.02701    | 11 |

|                        |            |                                  |            |    |
|------------------------|------------|----------------------------------|------------|----|
| GO: Cellular Component | GO:0044445 | cytosolic part                   | 0.00007139 | 10 |
| GO: Cellular Component | GO:0044297 | cell body                        | 0.04252    | 10 |
| GO: Cellular Component | GO:0000313 | organellar ribosome              | 9.626E-08  | 9  |
| GO: Cellular Component | GO:0005761 | mitochondrial ribosome           | 9.626E-08  | 9  |
| GO: Cellular Component | GO:0032993 | protein-DNA complex              | 0.00007139 | 9  |
| GO: Cellular Component | GO:0043209 | myelin sheath                    | 0.0001339  | 9  |
| GO: Cellular Component | GO:0000790 | nuclear chromatin                | 0.002163   | 9  |
| GO: Cellular Component | GO:0005925 | focal adhesion                   | 0.00662    | 9  |
| GO: Cellular Component | GO:0005924 | cell-substrate adherens junction | 0.007063   | 9  |
| GO: Cellular Component | GO:0030055 | cell-substrate junction          | 0.007355   | 9  |
| GO: Cellular Component | GO:0015629 | actin cytoskeleton               | 0.0165     | 9  |
| GO: Cellular Component | GO:0005912 | adherens junction                | 0.01813    | 9  |
| GO: Cellular Component | GO:0070161 | anchoring junction               | 0.02262    | 9  |
| GO: Cellular Component | GO:0015935 | small ribosomal subunit          | 0.00001594 | 7  |
| GO: Cellular Component | GO:0000786 | nucleosome                       | 0.0001277  | 7  |
| GO: Cellular Component | GO:0044815 | DNA packaging complex            | 0.0001499  | 7  |
| GO: Cellular Component | GO:0005681 | spliceosomal complex             | 0.001321   | 7  |
| GO: Cellular Component | GO:0016604 | nuclear body                     | 0.03586    | 7  |
| GO: Cellular Component | GO:0005884 | actin filament                   | 0.0004147  | 6  |
| GO: Cellular Component | GO:0015934 | large ribosomal subunit          | 0.0007423  | 6  |
| GO: Cellular Component | GO:0035770 | ribonucleoprotein granule        | 0.003519   | 6  |
| GO: Cellular Component | GO:0030017 | sarcomere                        | 0.01059    | 6  |
| GO: Cellular Component | GO:0044449 | contractile fiber part           | 0.01457    | 6  |
| GO: Cellular Component | GO:0030016 | myofibril                        | 0.01521    | 6  |
| GO: Cellular Component | GO:0043292 | contractile fiber                | 0.01932    | 6  |
| GO: Cellular Component | GO:0005938 | cell cortex                      | 0.03218    | 6  |
| GO: Cellular Component | GO:0005819 | spindle                          | 0.04835    | 6  |
| GO: Cellular Component | GO:0000788 | nuclear nucleosome               | 0.0001499  | 5  |
| GO: Cellular Component | GO:0071013 | catalytic step 2 spliceosome     | 0.0026     | 5  |
| GO: Cellular Component | GO:0030863 | cortical cytoskeleton            | 0.003519   | 5  |

|                        |            |                                                 |           |   |
|------------------------|------------|-------------------------------------------------|-----------|---|
| GO: Cellular Component | GO:0022626 | cytosolic ribosome                              | 0.007355  | 5 |
| GO: Cellular Component | GO:0044448 | cell cortex part                                | 0.01199   | 5 |
| GO: Cellular Component | GO:0036464 | cytoplasmic ribonucleoprotein granule           | 0.0141    | 5 |
| GO: Cellular Component | GO:0030027 | lamellipodium                                   | 0.03218   | 5 |
| GO: Cellular Component | GO:0005763 | mitochondrial small ribosomal subunit           | 0.0004147 | 4 |
| GO: Cellular Component | GO:0000314 | organellar small ribosomal subunit              | 0.0004147 | 4 |
| GO: Cellular Component | GO:0005762 | mitochondrial large ribosomal subunit           | 0.001084  | 4 |
| GO: Cellular Component | GO:0000315 | organellar large ribosomal subunit              | 0.001084  | 4 |
| GO: Cellular Component | GO:0032432 | actin filament bundle                           | 0.008518  | 4 |
| GO: Cellular Component | GO:0042641 | actomyosin                                      | 0.01008   | 4 |
| GO: Cellular Component | GO:0005903 | brush border                                    | 0.03861   | 4 |
| GO: Cellular Component | GO:0044798 | nuclear transcription factor complex            | 0.04109   | 4 |
| GO: Cellular Component | GO:0031674 | I band                                          | 0.04145   | 4 |
| GO: Cellular Component | GO:0002102 | podosome                                        | 0.005147  | 3 |
| GO: Cellular Component | GO:0005684 | U2-type spliceosomal complex                    | 0.007516  | 3 |
| GO: Cellular Component | GO:0022627 | cytosolic small ribosomal subunit               | 0.01558   | 3 |
| GO: Cellular Component | GO:0097525 | spliceosomal snRNP complex                      | 0.02534   | 3 |
| GO: Cellular Component | GO:0030532 | small nuclear ribonucleoprotein complex         | 0.03218   | 3 |
| GO: Cellular Component | GO:0001725 | stress fiber                                    | 0.03851   | 3 |
| GO: Cellular Component | GO:0005811 | lipid droplet                                   | 0.03851   | 3 |
| GO: Cellular Component | GO:0097517 | contractile actin filament bundle               | 0.03851   | 3 |
| GO: Cellular Component | GO:0044452 | nucleolar part                                  | 0.04081   | 3 |
| GO: Cellular Component | GO:0000932 | P-body                                          | 0.04204   | 3 |
| GO: Cellular Component | GO:0035985 | senescence-associated heterochromatin focus     | 0.002571  | 2 |
| GO: Cellular Component | GO:0031595 | nuclear proteasome complex                      | 0.008395  | 2 |
| GO: Cellular Component | GO:0005832 | chaperonin-containing T-complex                 | 0.01008   | 2 |
| GO: Cellular Component | GO:0002199 | zona pellucida receptor complex                 | 0.0141    | 2 |
| GO: Cellular Component | GO:0031597 | cytosolic proteasome complex                    | 0.01521   | 2 |
| GO: Cellular Component | GO:0008540 | proteasome regulatory particle, base subcomplex | 0.01521   | 2 |
| GO: Cellular Component | GO:0005686 | U2 snRNP                                        | 0.03218   | 2 |

|                        |            |                                |         |   |
|------------------------|------------|--------------------------------|---------|---|
| GO: Cellular Component | GO:0005838 | proteasome regulatory particle | 0.03586 | 2 |
| GO: Cellular Component | GO:0071011 | pre-catalytic spliceosome      | 0.03968 | 2 |
| GO: Cellular Component | GO:0035145 | exon-exon junction complex     | 0.03968 | 2 |
| GO: Cellular Component | GO:0022624 | proteasome accessory complex   | 0.04109 | 2 |
| GO: Cellular Component | GO:0005689 | U12-type spliceosomal complex  | 0.04584 | 2 |
| GO: Cellular Component | GO:0031941 | filamentous actin              | 0.04835 | 2 |
| GO: Cellular Component | GO:0071665 | gamma-catenin-TCF7L2 complex   | 0.03218 | 1 |
| GO: Cellular Component | GO:0042643 | actomyosin, actin portion      | 0.03218 | 1 |
| GO: Cellular Component | GO:0097226 | sperm mitochondrial sheath     | 0.04922 | 1 |

| <b>Decreased in the presence of SMURF2CG</b> |            |                                                       |           |   |
|----------------------------------------------|------------|-------------------------------------------------------|-----------|---|
| <b>Molecular Functions</b>                   |            |                                                       |           |   |
| GO: Molecular Function                       | GO:0070011 | peptidase activity, acting on L-amino acid peptides   | 0.01614   | 4 |
| GO: Molecular Function                       | GO:0008233 | peptidase activity                                    | 0.01614   | 4 |
| GO: Molecular Function                       | GO:0034987 | immunoglobulin receptor binding                       | 0.0001714 | 3 |
| GO: Molecular Function                       | GO:0003823 | antigen binding                                       | 0.007026  | 3 |
| GO: Molecular Function                       | GO:0004252 | serine-type endopeptidase activity                    | 0.01614   | 3 |
| GO: Molecular Function                       | GO:0008236 | serine-type peptidase activity                        | 0.01614   | 3 |
| GO: Molecular Function                       | GO:0017171 | serine hydrolase activity                             | 0.01614   | 3 |
| GO: Molecular Function                       | GO:0004175 | endopeptidase activity                                | 0.02829   | 3 |
| GO: Molecular Function                       | GO:0050421 | nitrite reductase (NO-forming) activity               | 0.01614   | 1 |
| GO: Molecular Function                       | GO:0098809 | nitrite reductase activity                            | 0.01614   | 1 |
| GO: Molecular Function                       | GO:0004124 | cysteine synthase activity                            | 0.01614   | 1 |
| GO: Molecular Function                       | GO:0070025 | carbon monoxide binding                               | 0.01614   | 1 |
| GO: Molecular Function                       | GO:0004122 | cystathionine beta-synthase activity                  | 0.01614   | 1 |
| GO: Molecular Function                       | GO:1904047 | S-adenosyl-L-methionine binding                       | 0.01614   | 1 |
| GO: Molecular Function                       | GO:0070026 | nitric oxide binding                                  | 0.01898   | 1 |
| GO: Molecular Function                       | GO:0004739 | pyruvate dehydrogenase (acetyl-transferring) activity | 0.01898   | 1 |
| GO: Molecular Function                       | GO:0001069 | regulatory region RNA binding                         | 0.01898   | 1 |

|                             |            |                                                                                                  |           |   |
|-----------------------------|------------|--------------------------------------------------------------------------------------------------|-----------|---|
| GO: Molecular Function      | GO:1990715 | mRNA CDS binding                                                                                 | 0.02248   | 1 |
| GO: Molecular Function      | GO:0017018 | myosin phosphatase activity                                                                      | 0.02248   | 1 |
| GO: Molecular Function      | GO:1990254 | keratin filament binding                                                                         | 0.02661   | 1 |
| GO: Molecular Function      | GO:1990247 | N6-methyladenosine-containing RNA binding                                                        | 0.02829   | 1 |
| GO: Molecular Function      | GO:0032050 | clathrin heavy chain binding                                                                     | 0.02829   | 1 |
| GO: Molecular Function      | GO:0004738 | pyruvate dehydrogenase activity                                                                  | 0.02829   | 1 |
| GO: Molecular Function      | GO:0034604 | pyruvate dehydrogenase (NAD+) activity                                                           | 0.02829   | 1 |
| GO: Molecular Function      | GO:0034603 | pyruvate dehydrogenase [NAD(P)+] activity                                                        | 0.02829   | 1 |
| GO: Molecular Function      | GO:0097157 | pre-mRNA intronic binding                                                                        | 0.02993   | 1 |
| GO: Molecular Function      | GO:0001849 | complement component C1q binding                                                                 | 0.02993   | 1 |
| GO: Molecular Function      | GO:0016662 | oxidoreductase activity, acting on other nitrogenous compounds as donors, cytochrome as acceptor | 0.03134   | 1 |
| GO: Molecular Function      | GO:0016624 | oxidoreductase activity, acting on the aldehyde or oxo group of donors, disulfide as acceptor    | 0.03134   | 1 |
| GO: Molecular Function      | GO:0043047 | single-stranded telomeric DNA binding                                                            | 0.03365   | 1 |
| GO: Molecular Function      | GO:0016661 | oxidoreductase activity, acting on other nitrogenous compounds as donors                         | 0.03668   | 1 |
| GO: Molecular Function      | GO:0098847 | sequence-specific single stranded DNA binding                                                    | 0.03668   | 1 |
| GO: Molecular Function      | GO:0048407 | platelet-derived growth factor binding                                                           | 0.03668   | 1 |
| GO: Molecular Function      | GO:0001846 | opsonin binding                                                                                  | 0.0415    | 1 |
| GO: Molecular Function      | GO:0019215 | intermediate filament binding                                                                    | 0.04604   | 1 |
| GO: Molecular Function      | GO:0070006 | metalloaminopeptidase activity                                                                   | 0.04626   | 1 |
| GO: Molecular Function      | GO:0035198 | miRNA binding                                                                                    | 0.04626   | 1 |
| <b>Biological Processes</b> |            |                                                                                                  |           |   |
| GO: Biological Process      | GO:0006897 | endocytosis                                                                                      | 0.008702  | 5 |
| GO: Biological Process      | GO:0050776 | regulation of immune response                                                                    | 0.01856   | 5 |
| GO: Biological Process      | GO:0006958 | complement activation, classical pathway                                                         | 0.0001185 | 4 |
| GO: Biological Process      | GO:0002455 | humoral immune response mediated by circulating immunoglobulin                                   | 0.000146  | 4 |
| GO: Biological Process      | GO:0006956 | complement activation                                                                            | 0.000146  | 4 |
| GO: Biological Process      | GO:0072376 | protein activation cascade                                                                       | 0.0003019 | 4 |
| GO: Biological Process      | GO:0016064 | immunoglobulin mediated immune response                                                          | 0.0005791 | 4 |
| GO: Biological Process      | GO:0019724 | B cell mediated immunity                                                                         | 0.0005791 | 4 |

|                        |            |                                                                                                                           |          |   |
|------------------------|------------|---------------------------------------------------------------------------------------------------------------------------|----------|---|
| GO: Biological Process | GO:0006959 | humoral immune response                                                                                                   | 0.002642 | 4 |
| GO: Biological Process | GO:0006909 | phagocytosis                                                                                                              | 0.003907 | 4 |
| GO: Biological Process | GO:0002449 | lymphocyte mediated immunity                                                                                              | 0.004195 | 4 |
| GO: Biological Process | GO:0002460 | adaptive immune response based on somatic recombination of immune receptors built from immunoglobulin superfamily domains | 0.004195 | 4 |
| GO: Biological Process | GO:0002443 | leukocyte mediated immunity                                                                                               | 0.009493 | 4 |
| GO: Biological Process | GO:0002250 | adaptive immune response                                                                                                  | 0.01302  | 4 |
| GO: Biological Process | GO:0002253 | activation of immune response                                                                                             | 0.02173  | 4 |
| GO: Biological Process | GO:0050778 | positive regulation of immune response                                                                                    | 0.03369  | 4 |
| GO: Biological Process | GO:0006518 | peptide metabolic process                                                                                                 | 0.04377  | 4 |
| GO: Biological Process | GO:0002252 | immune effector process                                                                                                   | 0.04377  | 4 |
| GO: Biological Process | GO:0042742 | defense response to bacterium                                                                                             | 0.02785  | 3 |
| GO: Biological Process | GO:0006898 | receptor-mediated endocytosis                                                                                             | 0.03574  | 3 |
| GO: Biological Process | GO:0002429 | immune response-activating cell surface receptor signaling pathway                                                        | 0.0373   | 3 |
| GO: Biological Process | GO:0070482 | response to oxygen levels                                                                                                 | 0.0373   | 3 |
| GO: Biological Process | GO:0006417 | regulation of translation                                                                                                 | 0.0373   | 3 |
| GO: Biological Process | GO:0002768 | immune response-regulating cell surface receptor signaling pathway                                                        | 0.03898  | 3 |
| GO: Biological Process | GO:0034248 | regulation of cellular amide metabolic process                                                                            | 0.03898  | 3 |
| GO: Biological Process | GO:0060351 | cartilage development involved in endochondral bone morphogenesis                                                         | 0.01302  | 2 |
| GO: Biological Process | GO:0036075 | replacement ossification                                                                                                  | 0.01304  | 2 |
| GO: Biological Process | GO:0001958 | endochondral ossification                                                                                                 | 0.01304  | 2 |
| GO: Biological Process | GO:0006910 | phagocytosis, recognition                                                                                                 | 0.01753  | 2 |
| GO: Biological Process | GO:0060325 | face morphogenesis                                                                                                        | 0.01831  | 2 |
| GO: Biological Process | GO:0030049 | muscle filament sliding                                                                                                   | 0.01831  | 2 |
| GO: Biological Process | GO:0033275 | actin-myosin filament sliding                                                                                             | 0.01831  | 2 |
| GO: Biological Process | GO:0060323 | head morphogenesis                                                                                                        | 0.02006  | 2 |
| GO: Biological Process | GO:0060350 | endochondral bone morphogenesis                                                                                           | 0.02526  | 2 |
| GO: Biological Process | GO:0006911 | phagocytosis, engulfment                                                                                                  | 0.02526  | 2 |
| GO: Biological Process | GO:0016441 | posttranscriptional gene silencing                                                                                        | 0.02526  | 2 |
| GO: Biological Process | GO:0060324 | face development                                                                                                          | 0.02526  | 2 |



|                        |            |                                                                                             |         |   |
|------------------------|------------|---------------------------------------------------------------------------------------------|---------|---|
| GO: Biological Process | GO:0035194 | posttranscriptional gene silencing by RNA                                                   | 0.02526 | 2 |
| GO: Biological Process | GO:0010171 | body morphogenesis                                                                          | 0.02612 | 2 |
| GO: Biological Process | GO:0050853 | B cell receptor signaling pathway                                                           | 0.02785 | 2 |
| GO: Biological Process | GO:0010324 | membrane invagination                                                                       | 0.02785 | 2 |
| GO: Biological Process | GO:0002433 | immune response-regulating cell surface receptor signaling pathway involved in phagocytosis | 0.0373  | 2 |
| GO: Biological Process | GO:0038096 | Fc-gamma receptor signaling pathway involved in phagocytosis                                | 0.0373  | 2 |
| GO: Biological Process | GO:0060349 | bone morphogenesis                                                                          | 0.0373  | 2 |
| GO: Biological Process | GO:0050871 | positive regulation of B cell activation                                                    | 0.0373  | 2 |
| GO: Biological Process | GO:0038094 | Fc-gamma receptor signaling pathway                                                         | 0.03813 | 2 |
| GO: Biological Process | GO:0002431 | Fc receptor mediated stimulatory signaling pathway                                          | 0.03896 | 2 |
| GO: Biological Process | GO:0070252 | actin-mediated cell contraction                                                             | 0.03898 | 2 |
| GO: Biological Process | GO:0033273 | response to vitamin                                                                         | 0.04043 | 2 |
| GO: Biological Process | GO:0050684 | regulation of mRNA processing                                                               | 0.04124 | 2 |
| GO: Biological Process | GO:0030048 | actin filament-based movement                                                               | 0.04755 | 2 |
| GO: Biological Process | GO:0043200 | response to amino acid                                                                      | 0.04895 | 2 |
| GO: Biological Process | GO:1903311 | regulation of mRNA metabolic process                                                        | 0.04895 | 2 |
| GO: Biological Process | GO:1990428 | miRNA transport                                                                             | 0.02421 | 1 |
| GO: Biological Process | GO:1902618 | cellular response to fluoride                                                               | 0.02421 | 1 |
| GO: Biological Process | GO:0043418 | homocysteine catabolic process                                                              | 0.03359 | 1 |
| GO: Biological Process | GO:0006535 | cysteine biosynthetic process from serine                                                   | 0.03359 | 1 |
| GO: Biological Process | GO:0042262 | DNA protection                                                                              | 0.0373  | 1 |
| GO: Biological Process | GO:0006565 | L-serine catabolic process                                                                  | 0.0373  | 1 |
| GO: Biological Process | GO:0019343 | cysteine biosynthetic process via cystathionine                                             | 0.0373  | 1 |
| GO: Biological Process | GO:0071306 | cellular response to vitamin E                                                              | 0.0373  | 1 |
| GO: Biological Process | GO:0044691 | tooth eruption                                                                              | 0.0373  | 1 |
| GO: Biological Process | GO:0036135 | Schwann cell migration                                                                      | 0.03898 | 1 |
| GO: Biological Process | GO:1902617 | response to fluoride                                                                        | 0.03898 | 1 |
| GO: Biological Process | GO:0009093 | cysteine catabolic process                                                                  | 0.03898 | 1 |
| GO: Biological Process | GO:0019344 | cysteine biosynthetic process                                                               | 0.03898 | 1 |

|                            |            |                                         |            |   |
|----------------------------|------------|-----------------------------------------|------------|---|
| GO: Biological Process     | GO:0019448 | L-cysteine catabolic process            | 0.03898    | 1 |
| GO: Biological Process     | GO:0046439 | L-cysteine metabolic process            | 0.03898    | 1 |
| GO: Biological Process     | GO:1900147 | regulation of Schwann cell migration    | 0.03898    | 1 |
| GO: Biological Process     | GO:0070814 | hydrogen sulfide biosynthetic process   | 0.04377    | 1 |
| GO: Biological Process     | GO:0019346 | transsulfuration                        | 0.04377    | 1 |
| GO: Biological Process     | GO:0009092 | homoserine metabolic process            | 0.04377    | 1 |
| GO: Biological Process     | GO:0036072 | direct ossification                     | 0.04895    | 1 |
| GO: Biological Process     | GO:0001957 | intramembranous ossification            | 0.04895    | 1 |
| <b>Cellular Components</b> |            |                                         |            |   |
| GO: Cellular Component     | GO:0005615 | extracellular space                     | 0.036      | 5 |
| GO: Cellular Component     | GO:0072562 | blood microparticle                     | 0.0001646  | 4 |
| GO: Cellular Component     | GO:0042571 | immunoglobulin complex, circulating     | 0.00007241 | 3 |
| GO: Cellular Component     | GO:0019814 | immunoglobulin complex                  | 0.00007241 | 3 |
| GO: Cellular Component     | GO:0036464 | cytoplasmic ribonucleoprotein granule   | 0.04429    | 2 |
| GO: Cellular Component     | GO:0035770 | ribonucleoprotein granule               | 0.0443     | 2 |
| GO: Cellular Component     | GO:0005584 | collagen type I trimer                  | 0.03328    | 1 |
| GO: Cellular Component     | GO:0071756 | pentameric IgM immunoglobulin complex   | 0.03328    | 1 |
| GO: Cellular Component     | GO:0071754 | IgM immunoglobulin complex, circulating | 0.03328    | 1 |
| GO: Cellular Component     | GO:0071753 | IgM immunoglobulin complex              | 0.03328    | 1 |
| GO: Cellular Component     | GO:0071749 | polymeric IgA immunoglobulin complex    | 0.03328    | 1 |
| GO: Cellular Component     | GO:0071751 | secretory IgA immunoglobulin complex    | 0.03328    | 1 |
| GO: Cellular Component     | GO:0071748 | monomeric IgA immunoglobulin complex    | 0.03328    | 1 |
| GO: Cellular Component     | GO:0071745 | IgA immunoglobulin complex              | 0.03328    | 1 |
| GO: Cellular Component     | GO:0071746 | IgA immunoglobulin complex, circulating | 0.03328    | 1 |
| GO: Cellular Component     | GO:0045098 | type III intermediate filament          | 0.036      | 1 |
| GO: Cellular Component     | GO:0071598 | neuronal ribonucleoprotein granule      | 0.0399     | 1 |
| GO: Cellular Component     | GO:0045254 | pyruvate dehydrogenase complex          | 0.0443     | 1 |
| GO: Cellular Component     | GO:0071439 | clathrin complex                        | 0.0472     | 1 |
